# Supplementary material for: Exploring the mechanism of resistance to sorafenib in two hepatocellular carcinoma cell lines
Source: publisher site journal article supplement (doi:10.18632/aging.104195), 2020-11-21
Supplement: Supplementary file [file aging-v12i23-104195-supplementary-material-SD6.pdf]

## SUPPLEMENTARY TABLE

**Supplementary Table 5. The Kyoto Encyclopedia of Genes and Genomes pathways enriched in sorafenib-resistant samples.**

| module   | ID       | Description                                 | p.adjust    | geneID                                                                                                                                                          | Count |
|----------|----------|---------------------------------------------|-------------|-----------------------------------------------------------------------------------------------------------------------------------------------------------------|-------|
| modulem1 | hsa04152 | AMPK signaling pathway                      | 0.041950813 | PPP2R5A/PPP2R5E/CCNA2                                                                                                                                           | 3     |
| modulem1 | hsa04110 | Cell cycle                                  | 7.73E-19    | STAG2/MCM2/MCM3/MCM5/MCM6/MCM7/PLK1/RAD21/BUB1/TTK/SMC1A/CDC45/CCNA2/PTTG1/CDK1                                                                                 | 15    |
| modulem1 | hsa03030 | DNA replication                             | 5.10E-10    | MCM2/MCM3/MCM5/MCM6/MCM7/RFC3/RFC4                                                                                                                              | 7     |
| modulem1 | hsa05166 | Human T-cell leukemia virus 1 infection     | 0.141651764 | XPO1/CCNA2/PTTG1                                                                                                                                                | 3     |
| modulem1 | hsa03430 | Mismatch repair                             | 0.016348116 | RFC3/RFC4                                                                                                                                                       | 2     |
| modulem1 | hsa03015 | mRNA surveillance pathway                   | 0.141651764 | PPP2R5A/PPP2R5E                                                                                                                                                 | 2     |
| modulem1 | hsa03420 | Nucleotide excision repair                  | 0.049602581 | RFC3/RFC4                                                                                                                                                       | 2     |
| modulem1 | hsa04114 | Oocyte meiosis                              | 4.74E-09    | FBXO5/PLK1/PPP2R5A/PPP2R5E/AURKA/BUB1/SMC1A/PTTG1/CDK1                                                                                                          | 9     |
| modulem1 | hsa04914 | Progesterone-mediated oocyte maturation     | 0.000206509 | PLK1/AURKA/BUB1/CCNA2/CDK1                                                                                                                                      | 5     |
| modulem1 | hsa03013 | RNA transport                               | 0.016348116 | NUP160/NUP43/RANGAP1/XPO1                                                                                                                                       | 4     |
| modulem2 | hsa03015 | mRNA surveillance pathway                   | 1.30E-09    | SRRM1/RNPS1/NUDT21/CSTF1/CSTF2/CSTF3/NCBP2/NCBP1/PABPN1                                                                                                         | 9     |
| modulem2 | hsa03013 | RNA transport                               | 0.003546577 | SRRM1/RNPS1/NCBP2/NCBP1/THOC2                                                                                                                                   | 5     |
| modulem2 | hsa03040 | Spliceosome                                 | 1.00E-35    | PRPF8/USP39/SRSF10/U2AF2/DHX15/HNRNPA3/NCBP2/SF3B3/RBMX/HNRNPK/HNRNPU/NCBP1/PCBP1/WBP11/P RPF40A/XAB2/THOC2/SNRPA/SNRPA1/SNRPC/SF3A2/P RPF3/SNRNP40/DHX38/DDX46 | 25    |
| modulem3 | hsa03008 | Ribosome biogenesis in eukaryotes           | 1.35E-13    | WDR3/GNL3/GNL2/NMD3/GNL3L/HEATR1/UTP14C/BMS1                                                                                                                    | 8     |
| modulem3 | hsa03020 | RNA polymerase                              | 0.077470859 | POLR1E                                                                                                                                                          | 1     |
| modulem4 | hsa04110 | Cell cycle                                  | 8.91E-21    | MCM2/MCM3/MCM5/MCM6/MCM7/ORC2/PLK1/ATR/RAD21/BUB1/TTK/SMC1A/CDC45/CCNA2/PTTG1/CDK1                                                                              | 16    |
| modulem4 | hsa04218 | Cellular senescence                         | 0.009542975 | NBN/ATR/CCNA2/CDK1                                                                                                                                              | 4     |
| modulem4 | hsa03030 | DNA replication                             | 4.86E-12    | POLD3/MCM2/MCM3/MCM5/MCM6/MCM7/RFC3/RFC4                                                                                                                        | 8     |
| modulem4 | hsa03460 | Fanconi anemia pathway                      | 0.053740596 | ATR/PALB2                                                                                                                                                       | 2     |
| modulem4 | hsa03440 | Homologous recombination                    | 7.96E-05    | POLD3/TOPBP1/NBN/PALB2                                                                                                                                          | 4     |
| modulem4 | hsa05166 | Human T-cell leukemia virus 1 infection     | 0.113368193 | ATR/CCNA2/PTTG1                                                                                                                                                 | 3     |
| modulem4 | hsa03430 | Mismatch repair                             | 9.11E-06    | POLD3/MSH6/RFC3/RFC4                                                                                                                                            | 4     |
| modulem4 | hsa03450 | Non-homologous end-joining                  | 0.113368193 | XRCC6                                                                                                                                                           | 1     |
| modulem4 | hsa03420 | Nucleotide excision repair                  | 0.002713314 | POLD3/RFC3/RFC4                                                                                                                                                 | 3     |
| modulem4 | hsa04114 | Oocyte meiosis                              | 2.87E-06    | FBXO5/PLK1/AURKA/BUB1/SMC1A/PTTG1/CDK1                                                                                                                          | 7     |
| modulem4 | hsa04115 | p53 signaling pathway                       | 0.082941236 | ATR/CDK1                                                                                                                                                        | 2     |
| modulem4 | hsa04914 | Progesterone-mediated oocyte maturation     | 0.00012879  | PLK1/AURKA/BUB1/CCNA2/CDK1                                                                                                                                      | 5     |
| modulem5 | hsa04340 | Hedgehog signaling pathway                  | 0.047695487 | FBXW11/SMURF2                                                                                                                                                   | 2     |
| modulem5 | hsa05012 | Parkinson disease                           | 0.197409651 | UBA1/UBE2G1                                                                                                                                                     | 2     |
| modulem5 | hsa04141 | Protein processing in endoplasmic reticulum | 0.207742282 | UBE2D1/UBE2G1                                                                                                                                                   | 2     |
| modulem5 | hsa05131 | Shigellosis                                 | 0.065360875 | FBXW11/UBE2D1                                                                                                                                                   | 2     |
| modulem5 | hsa04120 | Ubiquitin mediated proteolysis              | 3.36E-22    | HUWE1/UBE2E3/WWP1/FBXW11/MGRN1/SMURF2/UBA1/UBE2D1/UBE2G1/CUL2/SOCS1/UBE2M/TRIP12/UBE4A                                                                          | 14    |
| modulem6 | hsa04144 | Endocytosis                                 | 0.002587885 | ARFGEF1/ARFGAP3/ARF1/GBF1                                                                                                                                       | 4     |
| modulem6 | hsa04141 | Protein processing in endoplasmic reticulum | 4.29E-05    | SEC24B/SEC23B/SEC24A/SEC31A/SEC24D                                                                                                                              | 5     |

|          |          |                                       |             |                                                                |    |
|----------|----------|---------------------------------------|-------------|----------------------------------------------------------------|----|
| modulem7 | hsa03010 | Ribosome                              | 1.43E-09    | MRPL3/MRPS10/RPL5/RPL27/RPLP0/RPLP1/RPS12/MRPS9/MRPL11         | 9  |
| modulem7 | hsa03013 | RNA transport                         | 1.59E-10    | EIF1AX/EIF2S3/EIF4B/EIF4E/EIF4G1/EIF3E/EIF3D/EIF3G/EIF3I/EIF5B | 10 |
| modulem8 | hsa04210 | Apoptosis                             | 0.047212144 | TUBA4A/TUBA1C                                                  | 2  |
| modulem8 | hsa04110 | Cell cycle                            | 0.046453039 | YWHAE/YWHAG                                                    | 2  |
| modulem8 | hsa04540 | Gap junction                          | 9.14E-09    | TUBB4B/TUBB/TUBB2B/TUBA4A/TUBB2A/TUBA1C                        | 6  |
| modulem8 | hsa05160 | Hepatitis C                           | 0.047212144 | YWHAE/YWHAG                                                    | 2  |
| modulem8 | hsa04390 | Hippo signaling pathway               | 0.047212144 | YWHAE/YWHAG                                                    | 2  |
| modulem8 | hsa04114 | Oocyte meiosis                        | 0.003949079 | AURKA/YWHAE/YWHAG                                              | 3  |
| modulem8 | hsa05130 | Pathogenic Escherichia coli infection | 1.50E-09    | TUBB4B/TUBB/TUBB2B/TUBA4A/TUBB2A/TUBA1C                        | 6  |
| modulem8 | hsa04145 | Phagosome                             | 6.08E-09    | TUBB4B/DYNC112/TUBB/TUBB2B/TUBA4A/TUBB2A/TUBA1C                | 7  |
| modulem8 | hsa04530 | Tight junction                        | 0.007179351 | RAB8A/TUBA4A/TUBA1C                                            | 3  |
| modulem8 | hsa05203 | Viral carcinogenesis                  | 0.068829321 | YWHAE/YWHAG                                                    | 2  |
| modulem9 | hsa04210 | Apoptosis                             | 0.057983071 | TUBA4A/TUBA1C                                                  | 2  |
| modulem9 | hsa04110 | Cell cycle                            | 0.057983071 | YWHAE/YWHAG                                                    | 2  |
| modulem9 | hsa04540 | Gap junction                          | 1.86E-10    | TUBB3/TUBB4B/TUBB/TUBB2B/TUBA4A/TUBB2A/TUBA1C                  | 7  |
| modulem9 | hsa05160 | Hepatitis C                           | 0.057983071 | YWHAE/YWHAG                                                    | 2  |
| modulem9 | hsa04390 | Hippo signaling pathway               | 0.057983071 | YWHAE/YWHAG                                                    | 2  |
| modulem9 | hsa04114 | Oocyte meiosis                        | 0.057983071 | YWHAE/YWHAG                                                    | 2  |
| modulem9 | hsa05130 | Pathogenic Escherichia coli infection | 1.83E-11    | TUBB3/TUBB4B/TUBB/TUBB2B/TUBA4A/TUBB2A/TUBA1C                  | 7  |
| modulem9 | hsa04145 | Phagosome                             | 1.86E-10    | TUBB3/TUBB4B/DYNC112/TUBB/TUBB2B/TUBA4A/TUBB2A/TUBA1C          | 8  |
| modulem9 | hsa04530 | Tight junction                        | 0.012086629 | RAB8A/TUBA4A/TUBA1C                                            | 3  |
| modulem9 | hsa05203 | Viral carcinogenesis                  | 0.084210805 | YWHAE/YWHAG                                                    | 2  |
