# Supplementary material for: Exploring the mechanism of resistance to sorafenib in two hepatocellular carcinoma cell lines
Source: Aging (Albany NY). 2020 Nov 21;12(23):24255–69. doi: 10.18632/aging.104195 (PMC7762478; doi:10.18632/aging.104195)
Supplement: Supplementary Table 2 [file aging-12-104195-s003.xlsx]

## Sheet: Table S2
Supplementary Table 2. Biological processes enriched in sorafenib-resistant cells.
module	ID	Description	p.adjust	geneID	Count
modulem1	GO:0007059	chromosome segregation	2.06364e-34	PLK1/SMC1A/RAD21/STAG2/SUN1/NIPBL/INCENP/ZW10/TTK/NUP43/SMC2/NCAPD2/RCC2/KIF2C/NCAPH/PRC1/NSMCE2/NUF2/NDC80/KIF4A/CDCA8/DLGAP5/HJURP/ECT2/FBXO5/CENPF/CDCA2/MKI67/NEK2/KIF14/FAM83D/BUB1	32
modulem1	GO:0140014	mitotic nuclear division	2.10952e-33	PLK1/SMC1A/RAD21/STAG2/NIPBL/KNTC1/INCENP/ZW10/TTK/TPX2/SMC2/NCAPD2/KIF2C/NCAPH/PRC1/NSMCE2/NDC80/KIF11/KIF4A/CDCA8/DLGAP5/FBXO5/CENPF/MKI67/NEK2/KIF20B/KIF14/BORA/AURKA/ANLN	30
modulem1	GO:0000280	nuclear division	3.6571e-31	PLK1/SMC1A/RAD21/STAG2/SUN1/NIPBL/KNTC1/INCENP/ZW10/TTK/TPX2/SMC2/NCAPD2/KIF2C/NCAPH/PRC1/NSMCE2/NDC80/KIF11/KIF4A/CDCA8/DLGAP5/FBXO5/CENPF/MKI67/NEK2/KIF20B/KIF14/ASPM/BORA/AURKA/ANLN	32
modulem1	GO:0048285	organelle fission	7.27184e-30	PLK1/SMC1A/RAD21/STAG2/SUN1/NIPBL/KNTC1/INCENP/ZW10/TTK/TPX2/SMC2/NCAPD2/KIF2C/NCAPH/PRC1/NSMCE2/NDC80/KIF11/KIF4A/CDCA8/DLGAP5/FBXO5/CENPF/MKI67/NEK2/KIF20B/KIF14/ASPM/BORA/AURKA/ANLN	32
modulem1	GO:0098813	nuclear chromosome segregation	1.09461e-29	PLK1/SMC1A/RAD21/STAG2/SUN1/NIPBL/INCENP/ZW10/TTK/SMC2/NCAPD2/RCC2/KIF2C/NCAPH/PRC1/NSMCE2/NDC80/KIF4A/CDCA8/DLGAP5/ECT2/FBXO5/CENPF/NEK2/KIF14/FAM83D/BUB1	27
modulem1	GO:0000819	sister chromatid segregation	8.46085e-27	PLK1/SMC1A/RAD21/STAG2/NIPBL/INCENP/ZW10/TTK/SMC2/NCAPD2/KIF2C/NCAPH/PRC1/NSMCE2/NDC80/KIF4A/CDCA8/DLGAP5/FBXO5/CENPF/NEK2/KIF14/BUB1	23
modulem1	GO:0000070	mitotic sister chromatid segregation	3.92925e-25	PLK1/SMC1A/RAD21/NIPBL/INCENP/ZW10/TTK/SMC2/NCAPD2/KIF2C/NCAPH/PRC1/NSMCE2/NDC80/KIF4A/CDCA8/DLGAP5/FBXO5/CENPF/NEK2/KIF14	21
modulem1	GO:0007088	regulation of mitotic nuclear division	1.24563e-20	PLK1/SMC1A/RAD21/STAG2/KNTC1/ZW10/TTK/NSMCE2/NDC80/KIF11/DLGAP5/FBXO5/CENPF/MKI67/NEK2/KIF20B/BORA/AURKA/ANLN	19
modulem1	GO:0051783	regulation of nuclear division	1.62562e-19	PLK1/SMC1A/RAD21/STAG2/KNTC1/ZW10/TTK/NSMCE2/NDC80/KIF11/DLGAP5/FBXO5/CENPF/MKI67/NEK2/KIF20B/BORA/AURKA/ANLN	19
modulem1	GO:0000226	microtubule cytoskeleton organization	1.12242e-18	XPO1/PLK1/SMC1A/STAG2/SUN1/MAPRE1/ZW10/TTK/TPX2/STIL/CDK1/KIF2C/PRC1/NDC80/KIF11/KIF4A/CENPA/FBXO5/NEK2/NDE1/CKAP2/ASPM/BORA/AURKA/CKAP5	25
modulem1	GO:0007051	spindle organization	3.40677e-16	PLK1/SMC1A/STAG2/TTK/TPX2/STIL/PRC1/NDC80/KIF11/KIF4A/FBXO5/NEK2/ASPM/BORA/AURKA/CKAP5	16
modulem1	GO:1901987	regulation of cell cycle phase transition	3.40677e-16	PLK1/RAD21/MAPRE1/KNTC1/ZW10/TTK/TPX2/DTL/CDK1/RCC2/NSMCE2/NDC80/DLGAP5/FBXO5/CENPF/HMMR/NEK2/NDE1/KIF14/FAM83D/AURKA/ANLN/CKAP5	23
modulem1	GO:0051983	regulation of chromosome segregation	4.09331e-16	PLK1/RAD21/TTK/RCC2/KIF2C/NSMCE2/NDC80/DLGAP5/ECT2/FBXO5/CENPF/MKI67/NEK2/BUB1	14
modulem1	GO:1901990	regulation of mitotic cell cycle phase transition	8.30845e-16	PLK1/RAD21/MAPRE1/KNTC1/ZW10/TTK/TPX2/DTL/CDK1/RCC2/NSMCE2/NDC80/DLGAP5/FBXO5/CENPF/HMMR/NEK2/NDE1/KIF14/AURKA/ANLN/CKAP5	22
modulem1	GO:0000086	G2/M transition of mitotic cell cycle	1.24193e-15	PLK1/RAD21/MAPRE1/TPX2/DTL/CDK1/RCC2/CCNA2/MELK/FBXO5/CENPF/HMMR/NEK2/NDE1/KIF14/BORA/AURKA/CKAP5	18
modulem1	GO:0044839	cell cycle G2/M phase transition	4.57874e-15	PLK1/RAD21/MAPRE1/TPX2/DTL/CDK1/RCC2/CCNA2/MELK/FBXO5/CENPF/HMMR/NEK2/NDE1/KIF14/BORA/AURKA/CKAP5	18
modulem1	GO:1902850	microtubule cytoskeleton organization involved in mitosis	7.89008e-15	PLK1/SMC1A/STAG2/ZW10/TTK/TPX2/STIL/PRC1/NDC80/KIF11/KIF4A/CENPA/NDE1/BORA	14
modulem1	GO:0006260	DNA replication	1.03823e-13	RFC3/RFC4/SMC1A/STAG2/ESCO2/RRM1/DTL/MCM3/MCM5/MCM2/MCM7/MCM6/MCM8/CDK1/CCNA2/CDC45/FBXO5	17
modulem1	GO:0010389	regulation of G2/M transition of mitotic cell cycle	2.22064e-13	PLK1/RAD21/MAPRE1/TPX2/DTL/CDK1/RCC2/FBXO5/CENPF/HMMR/NEK2/NDE1/KIF14/AURKA/CKAP5	15
modulem1	GO:1902749	regulation of cell cycle G2/M phase transition	7.82325e-13	PLK1/RAD21/MAPRE1/TPX2/DTL/CDK1/RCC2/FBXO5/CENPF/HMMR/NEK2/NDE1/KIF14/AURKA/CKAP5	15
modulem1	GO:0034502	protein localization to chromosome	4.45878e-12	PLK1/RAD21/ESCO2/NIPBL/ZW10/TTK/MCM8/CDK1/RCC2/NDC80/CENPA	11
modulem1	GO:0007052	mitotic spindle organization	2.26643e-11	PLK1/SMC1A/STAG2/TTK/TPX2/STIL/PRC1/NDC80/KIF11/KIF4A/BORA	11
modulem1	GO:0050000	chromosome localization	3.93982e-11	SUN1/ZW10/KIF2C/NDC80/CDCA8/DLGAP5/CENPF/NDE1/KIF14/FAM83D	10
modulem1	GO:0051303	establishment of chromosome localization	3.93982e-11	SUN1/ZW10/KIF2C/NDC80/CDCA8/DLGAP5/CENPF/NDE1/KIF14/FAM83D	10
modulem1	GO:0051321	meiotic cell cycle	2.79673e-10	PLK1/SMC1A/RAD21/STAG2/SUN1/ZW10/TTK/SMC2/NCAPH/FBXO5/NEK2/ASPM/AURKA	13
modulem1	GO:0051225	spindle assembly	3.6387e-10	PLK1/SMC1A/STAG2/TPX2/KIF11/KIF4A/FBXO5/NEK2/ASPM/AURKA	10
modulem1	GO:0070507	regulation of microtubule cytoskeleton organization	5.75371e-10	XPO1/PLK1/SMC1A/STAG2/MAPRE1/TPX2/STIL/KIF11/NEK2/CKAP2/BORA/AURKA	12
modulem1	GO:0030071	regulation of mitotic metaphase/anaphase transition	7.63143e-10	PLK1/RAD21/TTK/NSMCE2/NDC80/DLGAP5/FBXO5/CENPF	8
modulem1	GO:0051304	chromosome separation	7.63143e-10	PLK1/RAD21/TTK/NCAPH/NSMCE2/NDC80/DLGAP5/FBXO5/CENPF	9
modulem1	GO:0033045	regulation of sister chromatid segregation	9.66587e-10	PLK1/RAD21/TTK/NSMCE2/NDC80/DLGAP5/FBXO5/CENPF/BUB1	9
modulem1	GO:1902099	regulation of metaphase/anaphase transition of cell cycle	1.0132e-09	PLK1/RAD21/TTK/NSMCE2/NDC80/DLGAP5/FBXO5/CENPF	8
modulem1	GO:0007091	metaphase/anaphase transition of mitotic cell cycle	1.14293e-09	PLK1/RAD21/TTK/NSMCE2/NDC80/DLGAP5/FBXO5/CENPF	8
modulem1	GO:0010965	regulation of mitotic sister chromatid separation	1.14293e-09	PLK1/RAD21/TTK/NSMCE2/NDC80/DLGAP5/FBXO5/CENPF	8
modulem1	GO:0044843	cell cycle G1/S phase transition	1.20551e-09	MCM3/MCM5/MCM2/MCM7/MCM6/MCM8/CDKN3/CDK1/CCNA2/CDC45/FBXO5/KIF14/FAM83D/AURKA	14
modulem1	GO:0044784	metaphase/anaphase transition of cell cycle	1.49181e-09	PLK1/RAD21/TTK/NSMCE2/NDC80/DLGAP5/FBXO5/CENPF	8
modulem1	GO:0051306	mitotic sister chromatid separation	1.49181e-09	PLK1/RAD21/TTK/NSMCE2/NDC80/DLGAP5/FBXO5/CENPF	8
modulem1	GO:0000910	cytokinesis	1.69697e-09	PLK1/INCENP/PRC1/KIF4A/CENPA/ECT2/KIF20B/KIF14/CKAP2/ANLN/AHCTF1	11
modulem1	GO:0000075	cell cycle checkpoint	2.2733e-09	ZWILCH/PLK1/KNTC1/ZW10/TTK/DTL/CDK1/NDC80/CDC45/CENPF/BUB1/AURKA	12
modulem1	GO:1905818	regulation of chromosome separation	2.2733e-09	PLK1/RAD21/TTK/NSMCE2/NDC80/DLGAP5/FBXO5/CENPF	8
modulem1	GO:0032886	regulation of microtubule-based process	2.46196e-09	XPO1/PLK1/SMC1A/STAG2/MAPRE1/TPX2/STIL/KIF11/NEK2/CKAP2/BORA/AURKA	12
modulem1	GO:0033047	regulation of mitotic sister chromatid segregation	4.66391e-09	PLK1/RAD21/TTK/NSMCE2/NDC80/DLGAP5/FBXO5/CENPF	8
modulem1	GO:0006261	DNA-dependent DNA replication	9.09445e-09	RFC3/RFC4/SMC1A/STAG2/MCM3/MCM5/MCM2/MCM7/MCM6/FBXO5	10
modulem1	GO:0071459	protein localization to chromosome, centromeric region	9.79547e-09	ZW10/TTK/CDK1/RCC2/NDC80/CENPA	6
modulem1	GO:0090068	positive regulation of cell cycle process	1.00907e-08	RAD21/DTL/CDK1/RCC2/NSMCE2/NDC80/DLGAP5/ECT2/FBXO5/KIF20B/KIF14/FAM83D/AURKA	13
modulem1	GO:0000281	mitotic cytokinesis	2.05977e-08	PLK1/INCENP/KIF4A/CENPA/ECT2/KIF20B/CKAP2/ANLN	8
modulem1	GO:0007093	mitotic cell cycle checkpoint	2.78533e-08	ZWILCH/PLK1/KNTC1/ZW10/TTK/CDK1/NDC80/CENPF/BUB1/AURKA	10
modulem1	GO:0033044	regulation of chromosome organization	2.99428e-08	PLK1/RAD21/NIPBL/TTK/MCM2/NSMCE2/NDC80/DLGAP5/FBXO5/CENPF/MKI67/NEK2/BUB1	13
modulem1	GO:0007098	centrosome cycle	4.39165e-08	XPO1/PLK1/STIL/CDK1/KIF11/NEK2/NDE1/AURKA/CKAP5	9
modulem1	GO:0007062	sister chromatid cohesion	5.91397e-08	PLK1/SMC1A/RAD21/STAG2/NIPBL/NSMCE2/BUB1	7
modulem1	GO:0000082	G1/S transition of mitotic cell cycle	6.25834e-08	MCM3/MCM5/MCM2/MCM7/MCM6/MCM8/CDKN3/CDK1/CDC45/FBXO5/KIF14/AURKA	12
modulem1	GO:0061640	cytoskeleton-dependent cytokinesis	7.39457e-08	PLK1/INCENP/KIF4A/CENPA/ECT2/KIF20B/CKAP2/ANLN	8
modulem1	GO:0031023	microtubule organizing center organization	8.68203e-08	XPO1/PLK1/STIL/CDK1/KIF11/NEK2/NDE1/AURKA/CKAP5	9
modulem1	GO:0051310	metaphase plate congression	1.09115e-07	ZW10/KIF2C/NDC80/CDCA8/CENPF/KIF14/FAM83D	7
modulem1	GO:0045841	negative regulation of mitotic metaphase/anaphase transition	1.22998e-07	PLK1/RAD21/TTK/NDC80/FBXO5/CENPF	6
modulem1	GO:2000816	negative regulation of mitotic sister chromatid separation	1.22998e-07	PLK1/RAD21/TTK/NDC80/FBXO5/CENPF	6
modulem1	GO:0034501	protein localization to kinetochore	1.4205e-07	ZW10/TTK/CDK1/RCC2/NDC80	5
modulem1	GO:1902100	negative regulation of metaphase/anaphase transition of cell cycle	1.4205e-07	PLK1/RAD21/TTK/NDC80/FBXO5/CENPF	6
modulem1	GO:1905819	negative regulation of chromosome separation	1.4205e-07	PLK1/RAD21/TTK/NDC80/FBXO5/CENPF	6
modulem1	GO:0033048	negative regulation of mitotic sister chromatid segregation	2.03202e-07	PLK1/RAD21/TTK/NDC80/FBXO5/CENPF	6
modulem1	GO:0045787	positive regulation of cell cycle	2.09105e-07	RAD21/DTL/CDK1/RCC2/NSMCE2/NDC80/DLGAP5/ECT2/FBXO5/KIF20B/KIF14/FAM83D/AURKA	13
modulem1	GO:0045930	negative regulation of mitotic cell cycle	2.34188e-07	ZWILCH/PLK1/RAD21/KNTC1/ZW10/TTK/CDK1/NDC80/FBXO5/CENPF/BUB1/AURKA	12
modulem1	GO:0033046	negative regulation of sister chromatid segregation	2.73152e-07	PLK1/RAD21/TTK/NDC80/FBXO5/CENPF	6
modulem1	GO:0140013	meiotic nuclear division	2.73152e-07	PLK1/RAD21/SUN1/TTK/SMC2/NCAPH/FBXO5/ASPM/AURKA	9
modulem1	GO:0051985	negative regulation of chromosome segregation	3.15236e-07	PLK1/RAD21/TTK/NDC80/FBXO5/CENPF	6
modulem1	GO:0006275	regulation of DNA replication	3.323e-07	RFC3/RFC4/SMC1A/STAG2/ESCO2/CDK1/CCNA2/FBXO5	8
modulem1	GO:0051383	kinetochore organization	4.35725e-07	SMC2/NDC80/CENPA/CENPF/CENPK	5
modulem1	GO:1903046	meiotic cell cycle process	4.39234e-07	PLK1/RAD21/SUN1/TTK/SMC2/NCAPH/FBXO5/ASPM/AURKA	9
modulem1	GO:0051653	spindle localization	4.78118e-07	PLK1/ZW10/NDC80/CENPA/NDE1/ASPM	6
modulem1	GO:0045931	positive regulation of mitotic cell cycle	5.06108e-07	DTL/CDK1/RCC2/NSMCE2/NDC80/DLGAP5/FBXO5/KIF20B/AURKA	9
modulem1	GO:0010948	negative regulation of cell cycle process	6.92536e-07	PLK1/SMC1A/RAD21/STAG2/TTK/DTL/CDK1/NDC80/FBXO5/CENPF/NEK2/AURKA	12
modulem1	GO:0071103	DNA conformation change	7.64949e-07	SMC2/MCM2/MCM7/MCM6/CDK1/NCAPD2/NCAPH/CDC45/CENPA/HJURP/CENPK	11
modulem1	GO:0045839	negative regulation of mitotic nuclear division	8.06462e-07	PLK1/RAD21/TTK/NDC80/FBXO5/CENPF	6
modulem1	GO:0072698	protein localization to microtubule cytoskeleton	1.04118e-06	MAPRE1/TTK/STIL/KIF20B/FAM83D/AURKA	6
modulem1	GO:0000132	establishment of mitotic spindle orientation	1.05061e-06	PLK1/ZW10/NDC80/CENPA/NDE1	5
modulem1	GO:0032465	regulation of cytokinesis	1.4215e-06	PLK1/INCENP/PRC1/ECT2/KIF20B/KIF14/AHCTF1	7
modulem1	GO:0051656	establishment of organelle localization	1.4215e-06	XPO1/PLK1/SUN1/ZW10/KIF2C/NDC80/CDCA8/CENPA/DLGAP5/CENPF/NDE1/KIF14/FAM83D	13
modulem1	GO:0044380	protein localization to cytoskeleton	1.44537e-06	MAPRE1/TTK/STIL/KIF20B/FAM83D/AURKA	6
modulem1	GO:0051784	negative regulation of nuclear division	1.79212e-06	PLK1/RAD21/TTK/NDC80/FBXO5/CENPF	6
modulem1	GO:0090307	mitotic spindle assembly	1.79212e-06	PLK1/SMC1A/STAG2/TPX2/KIF11/KIF4A	6
modulem1	GO:0040001	establishment of mitotic spindle localization	2.16186e-06	PLK1/ZW10/NDC80/CENPA/NDE1	5
modulem1	GO:0051294	establishment of spindle orientation	2.16186e-06	PLK1/ZW10/NDC80/CENPA/NDE1	5
modulem1	GO:0071168	protein localization to chromatin	2.16186e-06	PLK1/RAD21/ESCO2/NIPBL/MCM8	5
modulem1	GO:0051493	regulation of cytoskeleton organization	2.37802e-06	XPO1/PLK1/SMC1A/STAG2/MAPRE1/TPX2/STIL/KIF11/ECT2/NEK2/CKAP2/BORA/AURKA	13
modulem1	GO:0008608	attachment of spindle microtubules to kinetochore	2.54117e-06	RCC2/KIF2C/NDC80/ECT2/NEK2	5
modulem1	GO:0006270	DNA replication initiation	2.9681e-06	MCM3/MCM5/MCM2/MCM7/MCM6	5
modulem1	GO:0007143	female meiotic nuclear division	2.9681e-06	PLK1/TTK/NCAPH/FBXO5/AURKA	5
modulem1	GO:1901989	positive regulation of cell cycle phase transition	3.62186e-06	DTL/CDK1/RCC2/NSMCE2/DLGAP5/FBXO5/FAM83D	7
modulem1	GO:0051293	establishment of spindle localization	7.51445e-06	PLK1/ZW10/NDC80/CENPA/NDE1	5
modulem1	GO:0060236	regulation of mitotic spindle organization	8.56102e-06	PLK1/SMC1A/STAG2/TPX2/BORA	5
modulem1	GO:0051302	regulation of cell division	8.71318e-06	PLK1/INCENP/PRC1/ECT2/KIF20B/KIF14/ASPM/AHCTF1	8
modulem1	GO:0007163	establishment or maintenance of cell polarity	1.35652e-05	PLK1/ZW10/KIF2C/NDC80/CENPA/NDE1/KIF20B/CKAP5	8
modulem1	GO:0007080	mitotic metaphase plate congression	1.38899e-05	ZW10/KIF2C/NDC80/CDCA8/KIF14	5
modulem1	GO:0090224	regulation of spindle organization	1.38899e-05	PLK1/SMC1A/STAG2/TPX2/BORA	5
modulem1	GO:2001251	negative regulation of chromosome organization	1.88284e-05	PLK1/RAD21/TTK/MCM2/NDC80/FBXO5/CENPF	7
modulem1	GO:0016321	female meiosis chromosome segregation	2.18773e-05	PLK1/TTK/NCAPH	3
modulem1	GO:0032876	negative regulation of DNA endoreduplication	2.18773e-05	SMC1A/STAG2/FBXO5	3
modulem1	GO:0090306	spindle assembly involved in meiosis	2.18773e-05	FBXO5/ASPM/AURKA	3
modulem1	GO:1901992	positive regulation of mitotic cell cycle phase transition	2.23426e-05	DTL/CDK1/RCC2/NSMCE2/DLGAP5/FBXO5	6
modulem1	GO:1901988	negative regulation of cell cycle phase transition	2.44807e-05	PLK1/RAD21/TTK/DTL/CDK1/NDC80/FBXO5/CENPF/AURKA	9
modulem1	GO:0007292	female gamete generation	2.5512e-05	PLK1/TTK/MCM8/NCAPH/FBXO5/ASPM/AURKA	7
modulem1	GO:0090329	regulation of DNA-dependent DNA replication	2.85182e-05	RFC3/RFC4/SMC1A/STAG2/FBXO5	5
modulem1	GO:0006323	DNA packaging	2.98587e-05	SMC2/MCM2/CDK1/NCAPD2/NCAPH/CENPA/HJURP/CENPK	8
modulem1	GO:0010971	positive regulation of G2/M transition of mitotic cell cycle	4.36631e-05	DTL/CDK1/RCC2/FBXO5	4
modulem1	GO:0051984	positive regulation of chromosome segregation	4.36631e-05	RAD21/RCC2/NSMCE2/DLGAP5	4
modulem1	GO:0010639	negative regulation of organelle organization	4.36631e-05	PLK1/RAD21/MAPRE1/TTK/MCM2/NDC80/FBXO5/CENPF/NEK2/CKAP2	10
modulem1	GO:0097711	ciliary basal body-plasma membrane docking	4.86882e-05	PLK1/MAPRE1/CDK1/NEK2/NDE1/CKAP5	6
modulem1	GO:0046605	regulation of centrosome cycle	4.86882e-05	XPO1/STIL/KIF11/NEK2/AURKA	5
modulem1	GO:0006268	DNA unwinding involved in DNA replication	5.46632e-05	MCM2/MCM7/MCM6	3
modulem1	GO:0044786	cell cycle DNA replication	6.2621e-05	RFC3/RFC4/SMC1A/STAG2/FBXO5	5
modulem1	GO:1902751	positive regulation of cell cycle G2/M phase transition	6.79655e-05	DTL/CDK1/RCC2/FBXO5	4
modulem1	GO:0032875	regulation of DNA endoreduplication	7.95218e-05	SMC1A/STAG2/FBXO5	3
modulem1	GO:0007094	mitotic spindle assembly checkpoint	0.000100488	PLK1/TTK/NDC80/CENPF	4
modulem1	GO:0031577	spindle checkpoint	0.000100488	PLK1/TTK/NDC80/CENPF	4
modulem1	GO:0071173	spindle assembly checkpoint	0.000100488	PLK1/TTK/NDC80/CENPF	4
modulem1	GO:0071174	mitotic spindle checkpoint	0.000100488	PLK1/TTK/NDC80/CENPF	4
modulem1	GO:1901991	negative regulation of mitotic cell cycle phase transition	0.00010743	PLK1/RAD21/TTK/CDK1/NDC80/FBXO5/CENPF/AURKA	8
modulem1	GO:0042023	DNA endoreduplication	0.00010743	SMC1A/STAG2/FBXO5	3
modulem1	GO:0051052	regulation of DNA metabolic process	0.000126564	RFC3/RFC4/SMC1A/STAG2/ESCO2/KPNA2/CDK1/CCNA2/FBXO5/NEK2	10
modulem1	GO:0030261	chromosome condensation	0.000126564	SMC2/CDK1/NCAPD2/NCAPH	4
modulem1	GO:0045132	meiotic chromosome segregation	0.000126703	PLK1/SUN1/TTK/SMC2/NCAPH	5
modulem1	GO:0007100	mitotic centrosome separation	0.000142373	KIF11/NEK2/AURKA	3
modulem1	GO:0000212	meiotic spindle organization	0.000184641	FBXO5/ASPM/AURKA	3
modulem1	GO:0051299	centrosome separation	0.000184641	KIF11/NEK2/AURKA	3
modulem1	GO:0051988	regulation of attachment of spindle microtubules to kinetochore	0.000184641	RCC2/ECT2/NEK2	3
modulem1	GO:0007057	spindle assembly involved in female meiosis I	0.000196815	FBXO5/AURKA	2
modulem1	GO:0030010	establishment of cell polarity	0.000209181	PLK1/ZW10/NDC80/CENPA/NDE1/KIF20B	6
modulem1	GO:0031145	anaphase-promoting complex-dependent catabolic process	0.000302498	PLK1/PTTG1/CDK1/FBXO5/AURKA	5
modulem1	GO:0007076	mitotic chromosome condensation	0.000366377	SMC2/NCAPD2/NCAPH	3
modulem1	GO:0140056	organelle localization by membrane tethering	0.000385498	PLK1/MAPRE1/CDK1/NEK2/NDE1/CKAP5	6
modulem1	GO:0007127	meiosis I	0.000435854	PLK1/RAD21/SUN1/FBXO5/AURKA	5
modulem1	GO:0007096	regulation of exit from mitosis	0.000435854	KNTC1/ZW10/ANLN	3
modulem1	GO:0051382	kinetochore assembly	0.000435854	CENPA/CENPF/CENPK	3
modulem1	GO:0061982	meiosis I cell cycle process	0.000506346	PLK1/RAD21/SUN1/FBXO5/AURKA	5
modulem1	GO:0022406	membrane docking	0.000524532	PLK1/MAPRE1/CDK1/NEK2/NDE1/CKAP5	6
modulem1	GO:0007056	spindle assembly involved in female meiosis	0.000537162	FBXO5/AURKA	2
modulem1	GO:0010032	meiotic chromosome condensation	0.000537162	SMC2/NCAPH	2
modulem1	GO:0032954	regulation of cytokinetic process	0.000537162	ECT2/KIF20B	2
modulem1	GO:0034504	protein localization to nucleus	0.000561017	XPO1/PLK1/SUN1/KPNA2/RANGAP1/CDK1/ECT2	7
modulem1	GO:0031109	microtubule polymerization or depolymerization	0.000565924	MAPRE1/KIF2C/FBXO5/CKAP2/CKAP5	5
modulem1	GO:1902750	negative regulation of cell cycle G2/M phase transition	0.000652842	PLK1/RAD21/DTL/CDK1/AURKA	5
modulem1	GO:1901673	regulation of mitotic spindle assembly	0.000820004	PLK1/SMC1A/STAG2	3
modulem1	GO:0034508	centromere complex assembly	0.000865788	CENPA/HJURP/CENPF/CENPK	4
modulem1	GO:0007063	regulation of sister chromatid cohesion	0.000933729	RAD21/NSMCE2/BUB1	3
modulem1	GO:2000104	negative regulation of DNA-dependent DNA replication	0.000933729	SMC1A/STAG2/FBXO5	3
modulem1	GO:0030951	establishment or maintenance of microtubule cytoskeleton polarity	0.0010121	KIF2C/CKAP5	2
modulem1	GO:0075733	intracellular transport of virus	0.00104115	XPO1/NUP160/KPNA2/NUP43	4
modulem1	GO:0007064	mitotic sister chromatid cohesion	0.00121014	SMC1A/NIPBL/NSMCE2	3
modulem1	GO:0046794	transport of virus	0.00125512	XPO1/NUP160/KPNA2/NUP43	4
modulem1	GO:0051642	centrosome localization	0.00136007	SUN1/ASPM/AURKA	3
modulem1	GO:0061842	microtubule organizing center localization	0.0015303	SUN1/ASPM/AURKA	3
modulem1	GO:0090169	regulation of spindle assembly	0.00192086	PLK1/SMC1A/STAG2	3
modulem1	GO:0010458	exit from mitosis	0.00213034	KNTC1/ZW10/ANLN	3
modulem1	GO:0030952	establishment or maintenance of cytoskeleton polarity	0.00230862	KIF2C/CKAP5	2
modulem1	GO:0045842	positive regulation of mitotic metaphase/anaphase transition	0.00230862	NSMCE2/DLGAP5	2
modulem1	GO:1900262	regulation of DNA-directed DNA polymerase activity	0.00230862	RFC3/RFC4	2
modulem1	GO:1900264	positive regulation of DNA-directed DNA polymerase activity	0.00230862	RFC3/RFC4	2
modulem1	GO:1901970	positive regulation of mitotic sister chromatid separation	0.00230862	NSMCE2/DLGAP5	2
modulem1	GO:1902412	regulation of mitotic cytokinesis	0.00230862	INCENP/KIF20B	2
modulem1	GO:0044766	multi-organism transport	0.00244621	XPO1/NUP160/KPNA2/NUP43	4
modulem1	GO:0072401	signal transduction involved in DNA integrity checkpoint	0.00244621	PLK1/DTL/CDK1/AURKA	4
modulem1	GO:0072422	signal transduction involved in DNA damage checkpoint	0.00244621	PLK1/DTL/CDK1/AURKA	4
modulem1	GO:1902579	multi-organism localization	0.00244621	XPO1/NUP160/KPNA2/NUP43	4
modulem1	GO:0031572	G2 DNA damage checkpoint	0.00244621	PLK1/DTL/CDK1	3
modulem1	GO:0072395	signal transduction involved in cell cycle checkpoint	0.00254915	PLK1/DTL/CDK1/AURKA	4
modulem1	GO:0006890	retrograde vesicle-mediated transport, Golgi to ER	0.00278922	ZW10/KIF2C/KIF11/KIF4A	4
modulem1	GO:0032508	DNA duplex unwinding	0.00278922	MCM2/MCM7/MCM6/CDC45	4
modulem1	GO:0007144	female meiosis I	0.00302553	FBXO5/AURKA	2
modulem1	GO:1902101	positive regulation of metaphase/anaphase transition of cell cycle	0.00302553	NSMCE2/DLGAP5	2
modulem1	GO:0016925	protein sumoylation	0.00302553	NUP160/NUP43/RANGAP1/NSMCE2	4
modulem1	GO:0031570	DNA integrity checkpoint	0.00309528	PLK1/DTL/CDK1/CDC45/AURKA	5
modulem1	GO:0061351	neural precursor cell proliferation	0.00337316	RRM1/MELK/NDE1/KIF14/ASPM	5
modulem1	GO:0007019	microtubule depolymerization	0.00337316	KIF2C/CKAP2/CKAP5	3
modulem1	GO:0046602	regulation of mitotic centrosome separation	0.0038905	KIF11/NEK2	2
modulem1	GO:1905820	positive regulation of chromosome separation	0.0038905	NSMCE2/DLGAP5	2
modulem1	GO:0008156	negative regulation of DNA replication	0.00393046	SMC1A/STAG2/FBXO5	3
modulem1	GO:0032392	DNA geometric change	0.00420986	MCM2/MCM7/MCM6/CDC45	4
modulem1	GO:0032467	positive regulation of cytokinesis	0.00421538	ECT2/KIF20B/KIF14	3
modulem1	GO:0016572	histone phosphorylation	0.00451106	CDK1/CCNA2/AURKA	3
modulem1	GO:0042769	DNA damage response, detection of DNA damage	0.00451106	RFC3/RFC4/DTL	3
modulem1	GO:0000022	mitotic spindle elongation	0.00476835	PRC1/KIF4A	2
modulem1	GO:0006271	DNA strand elongation involved in DNA replication	0.00476835	RFC3/RFC4	2
modulem1	GO:0045876	positive regulation of sister chromatid cohesion	0.00476835	RAD21/NSMCE2	2
modulem1	GO:0019985	translesion synthesis	0.00513467	RFC3/RFC4/DTL	3
modulem1	GO:0051231	spindle elongation	0.00580123	PRC1/KIF4A	2
modulem1	GO:0051315	attachment of mitotic spindle microtubules to kinetochore	0.00580123	KIF2C/NDC80	2
modulem1	GO:0034080	CENP-A containing nucleosome assembly	0.00580123	CENPA/HJURP/CENPK	3
modulem1	GO:0061641	CENP-A containing chromatin organization	0.00580123	CENPA/HJURP/CENPK	3
modulem1	GO:2001252	positive regulation of chromosome organization	0.00635913	RAD21/NIPBL/NSMCE2/DLGAP5/NEK2	5
modulem1	GO:0006998	nuclear envelope organization	0.00702688	PLK1/SUN1/CDK1	3
modulem1	GO:0031055	chromatin remodeling at centromere	0.00745363	CENPA/HJURP/CENPK	3
modulem1	GO:0050657	nucleic acid transport	0.00746281	XPO1/NUP160/NUP43/CKAP5/AHCTF1	5
modulem1	GO:0050658	RNA transport	0.00746281	XPO1/NUP160/NUP43/CKAP5/AHCTF1	5
modulem1	GO:0006301	postreplication repair	0.00777271	RFC3/RFC4/DTL	3
modulem1	GO:0090630	activation of GTPase activity	0.00777271	RANGAP1/RCC2/ECT2	3
modulem1	GO:0051236	establishment of RNA localization	0.00792107	XPO1/NUP160/NUP43/CKAP5/AHCTF1	5
modulem1	GO:0007077	mitotic nuclear envelope disassembly	0.00796594	PLK1/CDK1	2
modulem1	GO:0034086	maintenance of sister chromatid cohesion	0.00796594	NIPBL/NSMCE2	2
modulem1	GO:0034088	maintenance of mitotic sister chromatid cohesion	0.00796594	NIPBL/NSMCE2	2
modulem1	GO:0045840	positive regulation of mitotic nuclear division	0.00805672	NSMCE2/DLGAP5/AURKA	3
modulem1	GO:0000731	DNA synthesis involved in DNA repair	0.00902628	RFC3/RFC4/DTL	3
modulem1	GO:0062033	positive regulation of mitotic sister chromatid segregation	0.00924695	NSMCE2/DLGAP5	2
modulem1	GO:0021987	cerebral cortex development	0.00982845	SUN1/NDE1/KIF14/ASPM	4
modulem1	GO:0070192	chromosome organization involved in meiotic cell cycle	0.00996316	SUN1/SMC2/NCAPH	3
modulem1	GO:0071897	DNA biosynthetic process	0.0102959	RFC3/RFC4/DTL/CENPF/NEK2	5
modulem1	GO:0006336	DNA replication-independent nucleosome assembly	0.0102959	CENPA/HJURP/CENPK	3
modulem1	GO:0034724	DNA replication-independent nucleosome organization	0.0102959	CENPA/HJURP/CENPK	3
modulem1	GO:0035372	protein localization to microtubule	0.0102959	MAPRE1/KIF20B	2
modulem1	GO:0051307	meiotic chromosome separation	0.0102959	TTK/NCAPH	2
modulem1	GO:0072425	signal transduction involved in G2 DNA damage checkpoint	0.0102959	PLK1/DTL	2
modulem1	GO:2001224	positive regulation of neuron migration	0.0102959	NIPBL/KIF20B	2
modulem1	GO:0043486	histone exchange	0.0112701	CENPA/HJURP/CENPK	3
modulem1	GO:0006997	nucleus organization	0.0113397	PLK1/SUN1/CDK1/AHCTF1	4
modulem1	GO:0022616	DNA strand elongation	0.0131847	RFC3/RFC4	2
modulem1	GO:0030397	membrane disassembly	0.0131847	PLK1/CDK1	2
modulem1	GO:0051081	nuclear envelope disassembly	0.0131847	PLK1/CDK1	2
modulem1	GO:0006913	nucleocytoplasmic transport	0.0133549	XPO1/NUP160/KPNA2/NUP43/RANGAP1/ECT2	6
modulem1	GO:0051298	centrosome duplication	0.0134065	XPO1/STIL/NDE1	3
modulem1	GO:0006403	RNA localization	0.0136875	XPO1/NUP160/NUP43/CKAP5/AHCTF1	5
modulem1	GO:0051169	nuclear transport	0.0138372	XPO1/NUP160/KPNA2/NUP43/RANGAP1/ECT2	6
modulem1	GO:0051785	positive regulation of nuclear division	0.0138753	NSMCE2/DLGAP5/AURKA	3
modulem1	GO:0065004	protein-DNA complex assembly	0.0140725	MCM2/CENPA/HJURP/CENPF/CENPK	5
modulem1	GO:0042770	signal transduction in response to DNA damage	0.0158276	PLK1/DTL/CDK1/AURKA	4
modulem1	GO:0042276	error-prone translesion synthesis	0.0161139	RFC3/RFC4	2
modulem1	GO:0000077	DNA damage checkpoint	0.0165666	PLK1/DTL/CDK1/AURKA	4
modulem1	GO:0015931	nucleobase-containing compound transport	0.017219	XPO1/NUP160/NUP43/CKAP5/AHCTF1	5
modulem1	GO:0006334	nucleosome assembly	0.0173253	MCM2/CENPA/HJURP/CENPK	4
modulem1	GO:0046785	microtubule polymerization	0.0174871	MAPRE1/FBXO5/CKAP5	3
modulem1	GO:2000573	positive regulation of DNA biosynthetic process	0.0174871	RFC3/RFC4/NEK2	3
modulem1	GO:0070987	error-free translesion synthesis	0.0174871	RFC3/RFC4	2
modulem1	GO:0007018	microtubule-based movement	0.0178449	SUN1/KIF2C/KIF11/KIF4A/DLGAP5	5
modulem1	GO:0022412	cellular process involved in reproduction in multicellular organism	0.0182296	PLK1/TTK/NCAPH/FBXO5/ASPM/AURKA	6
modulem1	GO:0043161	proteasome-mediated ubiquitin-dependent protein catabolic process	0.0187032	PLK1/PTTG1/CDK1/FBXO5/KIF14/AURKA	6
modulem1	GO:0060271	cilium assembly	0.0206459	PLK1/MAPRE1/CDK1/NEK2/NDE1/CKAP5	6
modulem1	GO:0051651	maintenance of location in cell	0.0218807	SUN1/RANGAP1/ASPM	3
modulem1	GO:0051028	mRNA transport	0.0219609	XPO1/NUP160/NUP43/AHCTF1	4
modulem1	GO:0051457	maintenance of protein location in nucleus	0.0219609	SUN1/RANGAP1	2
modulem1	GO:1903429	regulation of cell maturation	0.0219609	KIF14/AURKA	2
modulem1	GO:1904666	regulation of ubiquitin protein ligase activity	0.0219609	PLK1/FBXO5	2
modulem1	GO:0071824	protein-DNA complex subunit organization	0.0219609	MCM2/CENPA/HJURP/CENPF/CENPK	5
modulem1	GO:1900182	positive regulation of protein localization to nucleus	0.0219609	PLK1/CDK1/ECT2	3
modulem1	GO:0000741	karyogamy	0.0219609	CDK1	1
modulem1	GO:0000921	septin ring assembly	0.0219609	ANLN	1
modulem1	GO:0007344	pronuclear fusion	0.0219609	CDK1	1
modulem1	GO:0021685	cerebellar granular layer structural organization	0.0219609	KIF14	1
modulem1	GO:0031106	septin ring organization	0.0219609	ANLN	1
modulem1	GO:0033316	meiotic spindle assembly checkpoint	0.0219609	TTK	1
modulem1	GO:0035261	external genitalia morphogenesis	0.0219609	NIPBL	1
modulem1	GO:0044779	meiotic spindle checkpoint	0.0219609	TTK	1
modulem1	GO:0045769	negative regulation of asymmetric cell division	0.0219609	ASPM	1
modulem1	GO:1902480	protein localization to mitotic spindle	0.0219609	FAM83D	1
modulem1	GO:1903096	protein localization to meiotic spindle midzone	0.0219609	TTK	1
modulem1	GO:1903126	negative regulation of centriole-centriole cohesion	0.0219609	NEK2	1
modulem1	GO:1905359	protein localization to meiotic spindle	0.0219609	TTK	1
modulem1	GO:2000431	regulation of cytokinesis, actomyosin contractile ring assembly	0.0219609	ECT2	1
modulem1	GO:0044782	cilium organization	0.0220658	PLK1/MAPRE1/CDK1/NEK2/NDE1/CKAP5	6
modulem1	GO:0031100	animal organ regeneration	0.0224289	CDK1/CCNA2/AURKA	3
modulem1	GO:0006297	nucleotide-excision repair, DNA gap filling	0.0227889	RFC3/RFC4	2
modulem1	GO:0001764	neuron migration	0.023156	NIPBL/NDE1/KIF20B/ASPM	4
modulem1	GO:0031497	chromatin assembly	0.0236067	MCM2/CENPA/HJURP/CENPK	4
modulem1	GO:0043044	ATP-dependent chromatin remodeling	0.0237715	CENPA/HJURP/CENPK	3
modulem1	GO:0000723	telomere maintenance	0.0239701	RFC3/RFC4/NSMCE2/NEK2	4
modulem1	GO:0001556	oocyte maturation	0.0263541	FBXO5/AURKA	2
modulem1	GO:0051098	regulation of binding	0.0287485	PLK1/MAPRE1/NIPBL/HJURP/NEK2/AURKA	6
modulem1	GO:0006611	protein export from nucleus	0.0289233	XPO1/NUP160/NUP43/RANGAP1	4
modulem1	GO:0030900	forebrain development	0.0294877	SUN1/RRM1/STIL/NDE1/KIF14/ASPM	6
modulem1	GO:0048477	oogenesis	0.0294877	FBXO5/ASPM/AURKA	3
modulem1	GO:0051781	positive regulation of cell division	0.0294877	ECT2/KIF20B/KIF14	3
modulem1	GO:0034728	nucleosome organization	0.02973	MCM2/CENPA/HJURP/CENPK	4
modulem1	GO:0021846	cell proliferation in forebrain	0.0297486	RRM1/KIF14	2
modulem1	GO:0032201	telomere maintenance via semi-conservative replication	0.0297486	RFC3/RFC4	2
modulem1	GO:0010972	negative regulation of G2/M transition of mitotic cell cycle	0.0299159	RAD21/CDK1/AURKA	3
modulem1	GO:0021543	pallium development	0.0299159	SUN1/NDE1/KIF14/ASPM	4
modulem1	GO:0072331	signal transduction by p53 class mediator	0.0299933	RFC3/RFC4/TPX2/CDK1/AURKA	5
modulem1	GO:0032200	telomere organization	0.0303248	RFC3/RFC4/NSMCE2/NEK2	4
modulem1	GO:0010498	proteasomal protein catabolic process	0.0328032	PLK1/PTTG1/CDK1/FBXO5/KIF14/AURKA	6
modulem1	GO:0000083	regulation of transcription involved in G1/S transition of mitotic cell cycle	0.0334684	CDC45/FBXO5	2
modulem1	GO:0071539	protein localization to centrosome	0.0356268	STIL/AURKA	2
modulem1	GO:0051168	nuclear export	0.0358462	XPO1/NUP160/NUP43/RANGAP1	4
modulem1	GO:0006333	chromatin assembly or disassembly	0.0367378	MCM2/CENPA/HJURP/CENPK	4
modulem1	GO:0051261	protein depolymerization	0.0367378	KIF2C/CKAP2/CKAP5	3
modulem1	GO:1905508	protein localization to microtubule organizing center	0.0367378	STIL/AURKA	2
modulem1	GO:1901796	regulation of signal transduction by p53 class mediator	0.0367378	RFC3/RFC4/TPX2/AURKA	4
modulem1	GO:0021693	cerebellar Purkinje cell layer structural organization	0.0367378	KIF14	1
modulem1	GO:0021698	cerebellar cortex structural organization	0.0367378	KIF14	1
modulem1	GO:0032185	septin cytoskeleton organization	0.0367378	ANLN	1
modulem1	GO:0033624	negative regulation of integrin activation	0.0367378	KIF14	1
modulem1	GO:0036298	recombinational interstrand cross-link repair	0.0367378	MCM8	1
modulem1	GO:0051309	female meiosis chromosome separation	0.0367378	NCAPH	1
modulem1	GO:0061010	gall bladder development	0.0367378	NIPBL	1
modulem1	GO:0070194	synaptonemal complex disassembly	0.0367378	PLK1	1
modulem1	GO:0072356	chromosome passenger complex localization to kinetochore	0.0367378	RCC2	1
modulem1	GO:0075506	entry of viral genome into host nucleus through nuclear pore complex via importin	0.0367378	KPNA2	1
modulem1	GO:1900195	positive regulation of oocyte maturation	0.0367378	AURKA	1
modulem1	GO:1902103	negative regulation of metaphase/anaphase transition of meiotic cell cycle	0.0367378	TTK	1
modulem1	GO:1903031	regulation of microtubule plus-end binding	0.0367378	MAPRE1	1
modulem1	GO:1903033	positive regulation of microtubule plus-end binding	0.0367378	MAPRE1	1
modulem1	GO:1903436	regulation of mitotic cytokinetic process	0.0367378	KIF20B	1
modulem1	GO:1903438	positive regulation of mitotic cytokinetic process	0.0367378	KIF20B	1
modulem1	GO:1903490	positive regulation of mitotic cytokinesis	0.0367378	KIF20B	1
modulem1	GO:1904170	regulation of bleb assembly	0.0367378	ANLN	1
modulem1	GO:1904172	positive regulation of bleb assembly	0.0367378	ANLN	1
modulem1	GO:1905133	negative regulation of meiotic chromosome separation	0.0367378	TTK	1
modulem1	GO:1905775	negative regulation of DNA helicase activity	0.0367378	MCM2	1
modulem1	GO:0031111	negative regulation of microtubule polymerization or depolymerization	0.0368021	MAPRE1/CKAP2	2
modulem1	GO:0019886	antigen processing and presentation of exogenous peptide antigen via MHC class II	0.0383264	KIF2C/KIF11/KIF4A	3
modulem1	GO:1902115	regulation of organelle assembly	0.0384317	PLK1/SMC1A/STAG2/STIL	4
modulem1	GO:0006409	tRNA export from nucleus	0.0384317	NUP160/NUP43	2
modulem1	GO:0051031	tRNA transport	0.0384317	NUP160/NUP43	2
modulem1	GO:0071431	tRNA-containing ribonucleoprotein complex export from nucleus	0.0384317	NUP160/NUP43	2
modulem1	GO:0072595	maintenance of protein localization in organelle	0.040585	SUN1/RANGAP1	2
modulem1	GO:0002495	antigen processing and presentation of peptide antigen via MHC class II	0.0408317	KIF2C/KIF11/KIF4A	3
modulem1	GO:0002504	antigen processing and presentation of peptide or polysaccharide antigen via MHC class II	0.0416803	KIF2C/KIF11/KIF4A	3
modulem1	GO:0018107	peptidyl-threonine phosphorylation	0.0416803	PLK1/TTK/CDK1	3
modulem1	GO:0006289	nucleotide-excision repair	0.042671	RFC3/RFC4/NEIL3	3
modulem1	GO:0097064	ncRNA export from nucleus	0.044596	NUP160/NUP43	2
modulem1	GO:1902806	regulation of cell cycle G1/S phase transition	0.0447546	CDK1/KIF14/FAM83D/AURKA	4
modulem1	GO:0006296	nucleotide-excision repair, DNA incision, 5'-to lesion	0.0465655	RFC3/RFC4	2
modulem1	GO:0032506	cytokinetic process	0.0465655	ECT2/KIF20B	2
modulem1	GO:2000278	regulation of DNA biosynthetic process	0.0465983	RFC3/RFC4/NEK2	3
modulem1	GO:2001222	regulation of neuron migration	0.0484317	NIPBL/KIF20B	2
modulem1	GO:0018210	peptidyl-threonine modification	0.0484317	PLK1/TTK/CDK1	3
modulem1	GO:0006470	protein dephosphorylation	0.0484317	PPP2R5A/PPP2R5E/CDKN3/DLGAP5/CDCA2	5
modulem1	GO:0033683	nucleotide-excision repair, DNA incision	0.0484317	RFC3/RFC4	2
modulem1	GO:1903578	regulation of ATP metabolic process	0.0484317	NUP160/NUP43/CDK1	3
modulem1	GO:0014038	regulation of Schwann cell differentiation	0.0484317	CDK1	1
modulem1	GO:0021817	nucleokinesis involved in cell motility in cerebral cortex radial glia guided migration	0.0484317	SUN1	1
modulem1	GO:0030997	regulation of centriole-centriole cohesion	0.0484317	NEK2	1
modulem1	GO:0034421	post-translational protein acetylation	0.0484317	ESCO2	1
modulem1	GO:0043578	nuclear matrix organization	0.0484317	SUN1	1
modulem1	GO:0044785	metaphase/anaphase transition of meiotic cell cycle	0.0484317	TTK	1
modulem1	GO:0060282	positive regulation of oocyte development	0.0484317	AURKA	1
modulem1	GO:0071314	cellular response to cocaine	0.0484317	CCNA2	1
modulem1	GO:0071373	cellular response to luteinizing hormone stimulus	0.0484317	CCNA2	1
modulem1	GO:0090292	nuclear matrix anchoring at nuclear membrane	0.0484317	SUN1	1
modulem1	GO:1901994	negative regulation of meiotic cell cycle phase transition	0.0484317	TTK	1
modulem1	GO:1902102	regulation of metaphase/anaphase transition of meiotic cell cycle	0.0484317	TTK	1
modulem1	GO:1904116	response to vasopressin	0.0484317	RANGAP1	1
modulem1	GO:1904117	cellular response to vasopressin	0.0484317	RANGAP1	1
modulem1	GO:1905132	regulation of meiotic chromosome separation	0.0484317	TTK	1
modulem1	GO:1905319	mesenchymal stem cell migration	0.0484317	FBXO5	1
modulem1	GO:1905320	regulation of mesenchymal stem cell migration	0.0484317	FBXO5	1
modulem1	GO:1905322	positive regulation of mesenchymal stem cell migration	0.0484317	FBXO5	1
modulem1	GO:1905463	negative regulation of DNA duplex unwinding	0.0484317	MCM2	1
modulem1	GO:1905881	positive regulation of oogenesis	0.0484317	AURKA	1
modulem1	GO:0010824	regulation of centrosome duplication	0.0498367	XPO1/STIL	2
modulem1	GO:1903829	positive regulation of cellular protein localization	0.0501892	PLK1/CDK1/NDC80/ECT2/KIF20B	5
modulem1	GO:0051445	regulation of meiotic cell cycle	0.0519411	TTK/ASPM	2
modulem1	GO:0046777	protein autophosphorylation	0.0521166	TTK/MELK/NEK2/AURKA	4
modulem1	GO:0019058	viral life cycle	0.0535539	XPO1/NUP160/KPNA2/NUP43/CDK1	5
modulem1	GO:0035307	positive regulation of protein dephosphorylation	0.0537525	PPP2R5A/CDCA2	2
modulem1	GO:0007569	cell aging	0.0537525	CDK1/NSMCE2/FBXO5	3
modulem1	GO:0071426	ribonucleoprotein complex export from nucleus	0.0537525	XPO1/NUP160/NUP43	3
modulem1	GO:0071166	ribonucleoprotein complex localization	0.0546821	XPO1/NUP160/NUP43	3
modulem1	GO:1900180	regulation of protein localization to nucleus	0.0546821	PLK1/CDK1/ECT2	3
modulem1	GO:0048599	oocyte development	0.0580699	FBXO5/AURKA	2
modulem1	GO:0051101	regulation of DNA binding	0.0581497	NIPBL/HJURP/NEK2	3
modulem1	GO:0006405	RNA export from nucleus	0.059265	XPO1/NUP160/NUP43	3
modulem1	GO:0051054	positive regulation of DNA metabolic process	0.059265	RFC3/RFC4/CDK1/NEK2	4
modulem1	GO:0000055	ribosomal large subunit export from nucleus	0.059265	XPO1	1
modulem1	GO:0000056	ribosomal small subunit export from nucleus	0.059265	XPO1	1
modulem1	GO:0000912	assembly of actomyosin apparatus involved in cytokinesis	0.059265	ECT2	1
modulem1	GO:0000915	actomyosin contractile ring assembly	0.059265	ECT2	1
modulem1	GO:0007079	mitotic chromosome movement towards spindle pole	0.059265	DLGAP5	1
modulem1	GO:0009786	regulation of asymmetric cell division	0.059265	ASPM	1
modulem1	GO:0030473	nuclear migration along microtubule	0.059265	SUN1	1
modulem1	GO:0032487	regulation of Rap protein signal transduction	0.059265	KIF14	1
modulem1	GO:0033313	meiotic cell cycle checkpoint	0.059265	TTK	1
modulem1	GO:0034699	response to luteinizing hormone	0.059265	CCNA2	1
modulem1	GO:0075732	viral penetration into host nucleus	0.059265	KPNA2	1
modulem1	GO:0090521	glomerular visceral epithelial cell migration	0.059265	ANLN	1
modulem1	GO:1902594	multi-organism nuclear import	0.059265	KPNA2	1
modulem1	GO:1905340	regulation of protein localization to kinetochore	0.059265	NDC80	1
modulem1	GO:1905342	positive regulation of protein localization to kinetochore	0.059265	NDC80	1
modulem1	GO:1905774	regulation of DNA helicase activity	0.059265	MCM2	1
modulem1	GO:0033260	nuclear DNA replication	0.0619496	RFC3/RFC4	2
modulem1	GO:0045143	homologous chromosome segregation	0.0619496	PLK1/SUN1	2
modulem1	GO:0051438	regulation of ubiquitin-protein transferase activity	0.0619496	PLK1/FBXO5	2
modulem1	GO:0051494	negative regulation of cytoskeleton organization	0.064738	MAPRE1/NEK2/CKAP2	3
modulem1	GO:1900542	regulation of purine nucleotide metabolic process	0.064738	NUP160/NUP43/CDK1	3
modulem1	GO:0007050	cell cycle arrest	0.0651729	CDKN3/CDK1/KIF20B/AURKA	4
modulem1	GO:0018105	peptidyl-serine phosphorylation	0.0651729	PLK1/TTK/CDK1/AURKA	4
modulem1	GO:0009994	oocyte differentiation	0.0659591	FBXO5/AURKA	2
modulem1	GO:0090102	cochlea development	0.0659591	MCM2/CCNA2	2
modulem1	GO:0042176	regulation of protein catabolic process	0.0685832	XPO1/PLK1/DTL/FAM83D/AURKA	5
modulem1	GO:0006140	regulation of nucleotide metabolic process	0.0689412	NUP160/NUP43/CDK1	3
modulem1	GO:0031503	protein-containing complex localization	0.0689412	XPO1/NUP160/NUP43/RCC2	4
modulem1	GO:0021815	modulation of microtubule cytoskeleton involved in cerebral cortex radial glia guided migration	0.0689412	SUN1	1
modulem1	GO:0034093	positive regulation of maintenance of sister chromatid cohesion	0.0689412	NSMCE2	1
modulem1	GO:0034184	positive regulation of maintenance of mitotic sister chromatid cohesion	0.0689412	NSMCE2	1
modulem1	GO:0034398	telomere tethering at nuclear periphery	0.0689412	SUN1	1
modulem1	GO:0044771	meiotic cell cycle phase transition	0.0689412	TTK	1
modulem1	GO:0044821	meiotic telomere tethering at nuclear periphery	0.0689412	SUN1	1
modulem1	GO:0044837	actomyosin contractile ring organization	0.0689412	ECT2	1
modulem1	GO:0051097	negative regulation of helicase activity	0.0689412	MCM2	1
modulem1	GO:0051987	positive regulation of attachment of spindle microtubules to kinetochore	0.0689412	RCC2	1
modulem1	GO:0070197	meiotic attachment of telomere to nuclear envelope	0.0689412	SUN1	1
modulem1	GO:0090286	cytoskeletal anchoring at nuclear membrane	0.0689412	SUN1	1
modulem1	GO:0097240	chromosome attachment to the nuclear envelope	0.0689412	SUN1	1
modulem1	GO:1901993	regulation of meiotic cell cycle phase transition	0.0689412	TTK	1
modulem1	GO:1905448	positive regulation of mitochondrial ATP synthesis coupled electron transport	0.0689412	CDK1	1
modulem1	GO:1905462	regulation of DNA duplex unwinding	0.0689412	MCM2	1
modulem1	GO:2000241	regulation of reproductive process	0.070128	TTK/ASPM/AURKA	3
modulem1	GO:0035304	regulation of protein dephosphorylation	0.072674	PPP2R5A/PPP2R5E/CDCA2	3
modulem1	GO:0006310	DNA recombination	0.0733888	RAD21/KPNA2/MCM8/NSMCE2	4
modulem1	GO:0021537	telencephalon development	0.0751538	SUN1/NDE1/KIF14/ASPM	4
modulem1	GO:0035306	positive regulation of dephosphorylation	0.077235	PPP2R5A/CDCA2	2
modulem1	GO:0051053	negative regulation of DNA metabolic process	0.0775154	SMC1A/STAG2/FBXO5	3
modulem1	GO:0006977	DNA damage response, signal transduction by p53 class mediator resulting in cell cycle arrest	0.078626	CDK1/AURKA	2
modulem1	GO:0018209	peptidyl-serine modification	0.078626	PLK1/TTK/CDK1/AURKA	4
modulem1	GO:0000054	ribosomal subunit export from nucleus	0.078626	XPO1	1
modulem1	GO:0006607	NLS-bearing protein import into nucleus	0.078626	KPNA2	1
modulem1	GO:0033750	ribosome localization	0.078626	XPO1	1
modulem1	GO:0046826	negative regulation of protein export from nucleus	0.078626	RANGAP1	1
modulem1	GO:0051661	maintenance of centrosome location	0.078626	ASPM	1
modulem1	GO:0061038	uterus morphogenesis	0.078626	NIPBL	1
modulem1	GO:0071921	cohesin loading	0.078626	NIPBL	1
modulem1	GO:0090166	Golgi disassembly	0.078626	CDK1	1
modulem1	GO:1904528	positive regulation of microtubule binding	0.078626	MAPRE1	1
modulem1	GO:2000371	regulation of DNA topoisomerase (ATP-hydrolyzing) activity	0.078626	NCAPH	1
modulem1	GO:2000373	positive regulation of DNA topoisomerase (ATP-hydrolyzing) activity	0.078626	NCAPH	1
modulem1	GO:2000574	regulation of microtubule motor activity	0.078626	NDE1	1
modulem1	GO:0010212	response to ionizing radiation	0.0786604	NIPBL/RRM1/ECT2	3
modulem1	GO:0043467	regulation of generation of precursor metabolites and energy	0.0786604	NUP160/NUP43/CDK1	3
modulem1	GO:0032507	maintenance of protein location in cell	0.0786604	SUN1/RANGAP1	2
modulem1	GO:0072431	signal transduction involved in mitotic G1 DNA damage checkpoint	0.0786604	CDK1/AURKA	2
modulem1	GO:1902400	intracellular signal transduction involved in G1 DNA damage checkpoint	0.0786604	CDK1/AURKA	2
modulem1	GO:0007405	neuroblast proliferation	0.0810472	NDE1/ASPM	2
modulem1	GO:0072413	signal transduction involved in mitotic cell cycle checkpoint	0.0830683	CDK1/AURKA	2
modulem1	GO:1902402	signal transduction involved in mitotic DNA damage checkpoint	0.0830683	CDK1/AURKA	2
modulem1	GO:1902403	signal transduction involved in mitotic DNA integrity checkpoint	0.0830683	CDK1/AURKA	2
modulem1	GO:0021873	forebrain neuroblast division	0.0867874	ASPM	1
modulem1	GO:0033504	floor plate development	0.0867874	STIL	1
modulem1	GO:0034085	establishment of sister chromatid cohesion	0.0867874	NIPBL	1
modulem1	GO:0051256	mitotic spindle midzone assembly	0.0867874	KIF4A	1
modulem1	GO:0051305	chromosome movement towards spindle pole	0.0867874	DLGAP5	1
modulem1	GO:0071428	rRNA-containing ribonucleoprotein complex export from nucleus	0.0867874	XPO1	1
modulem1	GO:0090219	negative regulation of lipid kinase activity	0.0867874	PPP2R5A	1
modulem1	GO:0090232	positive regulation of spindle checkpoint	0.0867874	NDC80	1
modulem1	GO:0090267	positive regulation of mitotic cell cycle spindle assembly checkpoint	0.0867874	NDC80	1
modulem1	GO:0090435	protein localization to nuclear envelope	0.0867874	PLK1	1
modulem1	GO:1900193	regulation of oocyte maturation	0.0867874	AURKA	1
modulem1	GO:1901857	positive regulation of cellular respiration	0.0867874	CDK1	1
modulem1	GO:1902581	multi-organism cellular localization	0.0867874	KPNA2	1
modulem1	GO:1902583	multi-organism intracellular transport	0.0867874	KPNA2	1
modulem1	GO:0031571	mitotic G1 DNA damage checkpoint	0.0903791	CDK1/AURKA	2
modulem1	GO:0044819	mitotic G1/S transition checkpoint	0.0903791	CDK1/AURKA	2
modulem1	GO:0006338	chromatin remodeling	0.091373	CENPA/HJURP/CENPK	3
modulem1	GO:0044783	G1 DNA damage checkpoint	0.0926139	CDK1/AURKA	2
modulem1	GO:0019827	stem cell population maintenance	0.0939417	SMC1A/NIPBL/ASPM	3
modulem1	GO:0098727	maintenance of cell number	0.0949065	SMC1A/NIPBL/ASPM	3
modulem1	GO:0021814	cell motility involved in cerebral cortex radial glia guided migration	0.0949065	SUN1	1
modulem1	GO:0034091	regulation of maintenance of sister chromatid cohesion	0.0949065	NSMCE2	1
modulem1	GO:0034182	regulation of maintenance of mitotic sister chromatid cohesion	0.0949065	NSMCE2	1
modulem1	GO:0045835	negative regulation of meiotic nuclear division	0.0949065	TTK	1
modulem1	GO:0072396	response to cell cycle checkpoint signaling	0.0949065	SMC1A	1
modulem1	GO:0072402	response to DNA integrity checkpoint signaling	0.0949065	SMC1A	1
modulem1	GO:0072423	response to DNA damage checkpoint signaling	0.0949065	SMC1A	1
modulem1	GO:0098926	postsynaptic signal transduction	0.0949065	KPNA2	1
modulem1	GO:0099527	postsynapse to nucleus signaling pathway	0.0949065	KPNA2	1
modulem1	GO:1903431	positive regulation of cell maturation	0.0949065	AURKA	1
modulem1	GO:1903862	positive regulation of oxidative phosphorylation	0.0949065	CDK1	1
modulem1	GO:1904776	regulation of protein localization to cell cortex	0.0949065	PLK1	1
modulem1	GO:1905446	regulation of mitochondrial ATP synthesis coupled electron transport	0.0949065	CDK1	1
modulem1	GO:0032436	positive regulation of proteasomal ubiquitin-dependent protein catabolic process	0.0998975	PLK1/AURKA	2
modulem1	GO:0034614	cellular response to reactive oxygen species	0.101148	CDK1/CCNA2/ECT2	3
modulem1	GO:0031110	regulation of microtubule polymerization or depolymerization	0.101928	MAPRE1/CKAP2	2
modulem1	GO:0071479	cellular response to ionizing radiation	0.101928	NIPBL/ECT2	2
modulem1	GO:0048469	cell maturation	0.103409	FBXO5/KIF14/AURKA	3
modulem1	GO:0010911	regulation of isomerase activity	0.103409	NCAPH	1
modulem1	GO:0010912	positive regulation of isomerase activity	0.103409	NCAPH	1
modulem1	GO:0021683	cerebellar granular layer morphogenesis	0.103409	KIF14	1
modulem1	GO:0051292	nuclear pore complex assembly	0.103409	AHCTF1	1
modulem1	GO:0060281	regulation of oocyte development	0.103409	AURKA	1
modulem1	GO:1901978	positive regulation of cell cycle checkpoint	0.103409	NDC80	1
modulem1	GO:1904667	negative regulation of ubiquitin protein ligase activity	0.103409	FBXO5	1
modulem1	GO:1905879	regulation of oogenesis	0.103409	AURKA	1
modulem1	GO:1990314	cellular response to insulin-like growth factor stimulus	0.103409	CCNA2	1
modulem1	GO:0006283	transcription-coupled nucleotide-excision repair	0.110292	RFC3/RFC4	2
modulem1	GO:0002478	antigen processing and presentation of exogenous peptide antigen	0.112061	KIF2C/KIF11/KIF4A	3
modulem1	GO:0034599	cellular response to oxidative stress	0.112523	CDK1/CCNA2/MELK/ECT2	4
modulem1	GO:0009263	deoxyribonucleotide biosynthetic process	0.112523	RRM1	1
modulem1	GO:0051255	spindle midzone assembly	0.112523	KIF4A	1
modulem1	GO:0051657	maintenance of organelle location	0.112523	ASPM	1
modulem1	GO:0071481	cellular response to X-ray	0.112523	NIPBL	1
modulem1	GO:0072697	protein localization to cell cortex	0.112523	PLK1	1
modulem1	GO:1904526	regulation of microtubule binding	0.112523	MAPRE1	1
modulem1	GO:0019884	antigen processing and presentation of exogenous antigen	0.113197	KIF2C/KIF11/KIF4A	3
modulem1	GO:0006110	regulation of glycolytic process	0.113197	NUP160/NUP43	2
modulem1	GO:0048678	response to axon injury	0.113197	RANGAP1/CDK1	2
modulem1	GO:2000045	regulation of G1/S transition of mitotic cell cycle	0.114267	CDK1/KIF14/AURKA	3
modulem1	GO:0009314	response to radiation	0.114724	SMC1A/NIPBL/RRM1/DTL/ECT2	5
modulem1	GO:0030811	regulation of nucleotide catabolic process	0.117719	NUP160/NUP43	2
modulem1	GO:0090398	cellular senescence	0.117719	NSMCE2/FBXO5	2
modulem1	GO:0032147	activation of protein kinase activity	0.118071	TPX2/CDK1/ECT2/KIF14	4
modulem1	GO:0048193	Golgi vesicle transport	0.119012	ZW10/KIF2C/KIF11/KIF4A	4
modulem1	GO:0001578	microtubule bundle formation	0.119746	PLK1/PRC1	2
modulem1	GO:0000076	DNA replication checkpoint	0.119807	CDC45	1
modulem1	GO:0032060	bleb assembly	0.119807	ANLN	1
modulem1	GO:0035404	histone-serine phosphorylation	0.119807	AURKA	1
modulem1	GO:0045141	meiotic telomere clustering	0.119807	SUN1	1
modulem1	GO:0055015	ventricular cardiac muscle cell development	0.119807	CDK1	1
modulem1	GO:1900034	regulation of cellular response to heat	0.121044	NUP160/NUP43	2
modulem1	GO:0009798	axis specification	0.123551	STIL/AURKA	2
modulem2	GO:0000377	RNA splicing, via transesterification reactions with bulged adenosine as nucleophile	1.05551e-73	SRRM1/U2AF2/USP39/PRPF3/SNRPA/HTATSF1/NCBP2/NCBP1/PRPF8/NUDT21/SNRPC/SNRPA1/XAB2/SF3B3/HNRNPL/HNRNPA0/SUGP1/SRSF10/RBM10/SF3A2/RBM4/GTF2F1/CWC27/PABPN1/DDX46/DHX9/RNPS1/DHX38/DNAJC8/HNRNPA3/PRPF40A/SNRNP40/GPKOW/PCBP1/HNRNPU/WBP11/HNRNPUL1/ELAVL1/HNRNPR/RBMX/HNRNPH2/HNRNPF/HNRNPK/DHX15/HNRNPH3/YTHDC1/SRPK2/KHDRBS1/CSTF2/CSTF3/CSTF1	51
modulem2	GO:0000398	mRNA splicing, via spliceosome	1.05551e-73	SRRM1/U2AF2/USP39/PRPF3/SNRPA/HTATSF1/NCBP2/NCBP1/PRPF8/NUDT21/SNRPC/SNRPA1/XAB2/SF3B3/HNRNPL/HNRNPA0/SUGP1/SRSF10/RBM10/SF3A2/RBM4/GTF2F1/CWC27/PABPN1/DDX46/DHX9/RNPS1/DHX38/DNAJC8/HNRNPA3/PRPF40A/SNRNP40/GPKOW/PCBP1/HNRNPU/WBP11/HNRNPUL1/ELAVL1/HNRNPR/RBMX/HNRNPH2/HNRNPF/HNRNPK/DHX15/HNRNPH3/YTHDC1/SRPK2/KHDRBS1/CSTF2/CSTF3/CSTF1	51
modulem2	GO:0000375	RNA splicing, via transesterification reactions	1.32618e-73	SRRM1/U2AF2/USP39/PRPF3/SNRPA/HTATSF1/NCBP2/NCBP1/PRPF8/NUDT21/SNRPC/SNRPA1/XAB2/SF3B3/HNRNPL/HNRNPA0/SUGP1/SRSF10/RBM10/SF3A2/RBM4/GTF2F1/CWC27/PABPN1/DDX46/DHX9/RNPS1/DHX38/DNAJC8/HNRNPA3/PRPF40A/SNRNP40/GPKOW/PCBP1/HNRNPU/WBP11/HNRNPUL1/ELAVL1/HNRNPR/RBMX/HNRNPH2/HNRNPF/HNRNPK/DHX15/HNRNPH3/YTHDC1/SRPK2/KHDRBS1/CSTF2/CSTF3/CSTF1	51
modulem2	GO:0008380	RNA splicing	2.01539e-70	SRRM1/U2AF2/USP39/PRPF3/SNRPA/HTATSF1/NCBP2/NCBP1/PRPF8/NUDT21/SNRPC/SNRPA1/XAB2/SF3B3/HNRNPL/HNRNPA0/SUGP1/SRSF10/RBM10/SF3A2/RBM4/GTF2F1/CWC27/PABPN1/DDX46/DHX9/RNPS1/DHX38/DNAJC8/HNRNPA3/PRPF40A/SNRNP40/GPKOW/PCBP1/HNRNPU/WBP11/HNRNPUL1/ELAVL1/HNRNPR/RBMX/HNRNPH2/HNRNPF/HNRNPK/DHX15/HNRNPH3/YTHDC1/THOC2/SRPK2/KHDRBS1/CSTF2/CSTF3/CSTF1	52
modulem2	GO:0006397	mRNA processing	9.92337e-70	SRRM1/U2AF2/ZC3H11A/USP39/PRPF3/SNRPA/HTATSF1/NCBP2/NCBP1/PRPF8/NUDT21/SNRPC/SNRPA1/XAB2/SF3B3/HNRNPL/HNRNPA0/SUGP1/SRSF10/RBM10/SF3A2/RBM4/GTF2F1/CWC27/PABPN1/DDX46/DHX9/RNPS1/DHX38/DNAJC8/HNRNPA3/PRPF40A/SNRNP40/GPKOW/PCBP1/HNRNPU/WBP11/HNRNPUL1/ELAVL1/HNRNPR/RBMX/HNRNPH2/HNRNPF/HNRNPK/DHX15/HNRNPH3/YTHDC1/THOC2/SRPK2/KHDRBS1/CSTF2/CSTF3/CSTF1	53
modulem2	GO:1903311	regulation of mRNA metabolic process	1.00068e-23	U2AF2/SNRPA/NCBP2/NCBP1/NUDT21/HNRNPL/HNRNPA0/SRSF10/RBM10/RBM4/PABPN1/DHX9/RNPS1/HNRNPU/ELAVL1/HNRNPR/RBMX/HNRNPK/YTHDC1/IGF2BP1/SRPK2/KHDRBS1/DHX34	23
modulem2	GO:0050684	regulation of mRNA processing	1.00068e-23	U2AF2/SNRPA/NCBP2/NCBP1/NUDT21/HNRNPL/SRSF10/RBM10/RBM4/PABPN1/DHX9/RNPS1/HNRNPU/RBMX/HNRNPK/YTHDC1/SRPK2/KHDRBS1	18
modulem2	GO:0031124	mRNA 3'-end processing	8.41506e-18	SRRM1/U2AF2/ZC3H11A/SNRPA/NCBP2/NCBP1/NUDT21/PABPN1/RNPS1/DHX38/THOC2/CSTF2/CSTF3/CSTF1	14
modulem2	GO:0048024	regulation of mRNA splicing, via spliceosome	4.41128e-17	U2AF2/NCBP1/HNRNPL/SRSF10/RBM10/RBM4/RNPS1/HNRNPU/RBMX/HNRNPK/YTHDC1/SRPK2/KHDRBS1	13
modulem2	GO:0031123	RNA 3'-end processing	9.47391e-17	SRRM1/U2AF2/ZC3H11A/SNRPA/NCBP2/NCBP1/NUDT21/PABPN1/RNPS1/DHX38/THOC2/CSTF2/CSTF3/CSTF1	14
modulem2	GO:0050657	nucleic acid transport	9.47391e-17	SRRM1/U2AF2/ZC3H11A/NCBP2/NCBP1/PABPN1/DHX9/RNPS1/DHX38/HNRNPA3/HNRNPU/YTHDC1/THOC2/IGF2BP1/KHDRBS1/FYTTD1	16
modulem2	GO:0050658	RNA transport	9.47391e-17	SRRM1/U2AF2/ZC3H11A/NCBP2/NCBP1/PABPN1/DHX9/RNPS1/DHX38/HNRNPA3/HNRNPU/YTHDC1/THOC2/IGF2BP1/KHDRBS1/FYTTD1	16
modulem2	GO:0051236	establishment of RNA localization	1.15106e-16	SRRM1/U2AF2/ZC3H11A/NCBP2/NCBP1/PABPN1/DHX9/RNPS1/DHX38/HNRNPA3/HNRNPU/YTHDC1/THOC2/IGF2BP1/KHDRBS1/FYTTD1	16
modulem2	GO:0043484	regulation of RNA splicing	2.09207e-16	U2AF2/NCBP1/HNRNPL/SRSF10/RBM10/RBM4/RNPS1/HNRNPU/RBMX/HNRNPF/HNRNPK/YTHDC1/SRPK2/KHDRBS1	14
modulem2	GO:1903312	negative regulation of mRNA metabolic process	6.29669e-16	U2AF2/HNRNPA0/SRSF10/RBM10/DHX9/RNPS1/HNRNPU/ELAVL1/RBMX/HNRNPK/IGF2BP1/DHX34	12
modulem2	GO:0006403	RNA localization	1.05792e-15	SRRM1/U2AF2/ZC3H11A/NCBP2/NCBP1/PABPN1/DHX9/RNPS1/DHX38/HNRNPA3/HNRNPU/YTHDC1/THOC2/IGF2BP1/KHDRBS1/FYTTD1	16
modulem2	GO:0015931	nucleobase-containing compound transport	2.63138e-15	SRRM1/U2AF2/ZC3H11A/NCBP2/NCBP1/PABPN1/DHX9/RNPS1/DHX38/HNRNPA3/HNRNPU/YTHDC1/THOC2/IGF2BP1/KHDRBS1/FYTTD1	16
modulem2	GO:0051028	mRNA transport	5.07104e-15	SRRM1/U2AF2/ZC3H11A/NCBP2/NCBP1/PABPN1/DHX9/RNPS1/DHX38/HNRNPA3/YTHDC1/THOC2/IGF2BP1/FYTTD1	14
modulem2	GO:0006405	RNA export from nucleus	1.59602e-14	SRRM1/U2AF2/ZC3H11A/NCBP2/NCBP1/PABPN1/DHX9/RNPS1/DHX38/YTHDC1/THOC2/KHDRBS1/FYTTD1	13
modulem2	GO:0051168	nuclear export	1.89034e-12	SRRM1/U2AF2/ZC3H11A/NCBP2/NCBP1/PABPN1/DHX9/RNPS1/DHX38/YTHDC1/THOC2/KHDRBS1/FYTTD1	13
modulem2	GO:0006406	mRNA export from nucleus	4.48134e-12	SRRM1/U2AF2/ZC3H11A/NCBP2/NCBP1/PABPN1/RNPS1/DHX38/YTHDC1/THOC2/FYTTD1	11
modulem2	GO:0071427	mRNA-containing ribonucleoprotein complex export from nucleus	4.48134e-12	SRRM1/U2AF2/ZC3H11A/NCBP2/NCBP1/PABPN1/RNPS1/DHX38/YTHDC1/THOC2/FYTTD1	11
modulem2	GO:0071426	ribonucleoprotein complex export from nucleus	1.06061e-11	SRRM1/U2AF2/ZC3H11A/NCBP2/NCBP1/PABPN1/RNPS1/DHX38/YTHDC1/THOC2/FYTTD1	11
modulem2	GO:0071166	ribonucleoprotein complex localization	1.11878e-11	SRRM1/U2AF2/ZC3H11A/NCBP2/NCBP1/PABPN1/RNPS1/DHX38/YTHDC1/THOC2/FYTTD1	11
modulem2	GO:0006913	nucleocytoplasmic transport	8.83556e-11	SRRM1/U2AF2/ZC3H11A/NCBP2/NCBP1/RBM4/PABPN1/DHX9/RNPS1/DHX38/YTHDC1/THOC2/KHDRBS1/FYTTD1	14
modulem2	GO:0051169	nuclear transport	9.70774e-11	SRRM1/U2AF2/ZC3H11A/NCBP2/NCBP1/RBM4/PABPN1/DHX9/RNPS1/DHX38/YTHDC1/THOC2/KHDRBS1/FYTTD1	14
modulem2	GO:0006369	termination of RNA polymerase II transcription	3.72422e-10	NCBP2/NCBP1/NUDT21/PABPN1/CSTF2/CSTF3/CSTF1	7
modulem2	GO:0006611	protein export from nucleus	3.72422e-10	SRRM1/U2AF2/ZC3H11A/NCBP2/NCBP1/PABPN1/RNPS1/DHX38/YTHDC1/THOC2/FYTTD1	11
modulem2	GO:0000380	alternative mRNA splicing, via spliceosome	4.27488e-10	HNRNPL/RBM10/RBM4/DHX9/RNPS1/HNRNPU/RBMX/KHDRBS1	8
modulem2	GO:0048025	negative regulation of mRNA splicing, via spliceosome	1.10882e-09	U2AF2/SRSF10/RBM10/RNPS1/RBMX/HNRNPK	6
modulem2	GO:0031503	protein-containing complex localization	1.12958e-09	SRRM1/U2AF2/ZC3H11A/NCBP2/NCBP1/PABPN1/RNPS1/DHX38/HNRNPU/YTHDC1/THOC2/FYTTD1	12
modulem2	GO:0000381	regulation of alternative mRNA splicing, via spliceosome	2.67341e-09	HNRNPL/RBM10/RBM4/RNPS1/HNRNPU/RBMX/KHDRBS1	7
modulem2	GO:0006353	DNA-templated transcription, termination	2.89326e-09	NCBP2/NCBP1/NUDT21/PABPN1/DHX9/CSTF2/CSTF3/CSTF1	8
modulem2	GO:1902373	negative regulation of mRNA catabolic process	3.58606e-09	HNRNPA0/RBM10/DHX9/HNRNPU/ELAVL1/IGF2BP1/DHX34	7
modulem2	GO:0022618	ribonucleoprotein complex assembly	4.36106e-09	USP39/PRPF3/NCBP1/PRPF8/NUDT21/SNRPC/SRSF10/SF3A2/DHX9/YTHDC1/SRPK2	11
modulem2	GO:0033119	negative regulation of RNA splicing	4.51948e-09	U2AF2/SRSF10/RBM10/RNPS1/RBMX/HNRNPK	6
modulem2	GO:0071826	ribonucleoprotein complex subunit organization	7.48269e-09	USP39/PRPF3/NCBP1/PRPF8/NUDT21/SNRPC/SRSF10/SF3A2/DHX9/YTHDC1/SRPK2	11
modulem2	GO:1902369	negative regulation of RNA catabolic process	8.40875e-09	HNRNPA0/RBM10/DHX9/HNRNPU/ELAVL1/IGF2BP1/DHX34	7
modulem2	GO:0050686	negative regulation of mRNA processing	9.09739e-09	U2AF2/SRSF10/RBM10/RNPS1/RBMX/HNRNPK	6
modulem2	GO:0048255	mRNA stabilization	5.68992e-08	HNRNPA0/RBM10/DHX9/HNRNPU/ELAVL1/IGF2BP1	6
modulem2	GO:0043489	RNA stabilization	1.26347e-07	HNRNPA0/RBM10/DHX9/HNRNPU/ELAVL1/IGF2BP1	6
modulem2	GO:0022613	ribonucleoprotein complex biogenesis	1.76975e-07	USP39/PRPF3/NCBP1/PRPF8/NUDT21/SNRPC/SRSF10/SF3A2/DHX9/WBP11/YTHDC1/SRPK2	12
modulem2	GO:0006402	mRNA catabolic process	5.43394e-07	NCBP2/NCBP1/HNRNPA0/RBM10/DHX9/RNPS1/HNRNPU/ELAVL1/HNRNPR/IGF2BP1/DHX34	11
modulem2	GO:0006401	RNA catabolic process	1.26124e-06	NCBP2/NCBP1/HNRNPA0/RBM10/DHX9/RNPS1/HNRNPU/ELAVL1/HNRNPR/IGF2BP1/DHX34	11
modulem2	GO:0000245	spliceosomal complex assembly	3.36858e-06	USP39/NCBP1/SRSF10/SF3A2/YTHDC1/SRPK2	6
modulem2	GO:0061013	regulation of mRNA catabolic process	3.88197e-06	HNRNPA0/RBM10/DHX9/HNRNPU/ELAVL1/HNRNPR/IGF2BP1/DHX34	8
modulem2	GO:0006379	mRNA cleavage	5.44732e-06	NCBP2/NCBP1/NUDT21/CSTF3	4
modulem2	GO:0046833	positive regulation of RNA export from nucleus	6.53661e-06	NCBP2/DHX9/KHDRBS1	3
modulem2	GO:0070934	CRD-mediated mRNA stabilization	6.53661e-06	DHX9/HNRNPU/IGF2BP1	3
modulem2	GO:0032241	positive regulation of nucleobase-containing compound transport	1.27785e-05	NCBP2/DHX9/KHDRBS1	3
modulem2	GO:0098789	pre-mRNA cleavage required for polyadenylation	2.1867e-05	NCBP2/NCBP1/NUDT21	3
modulem2	GO:0043488	regulation of mRNA stability	2.23747e-05	HNRNPA0/RBM10/DHX9/HNRNPU/ELAVL1/HNRNPR/IGF2BP1	7
modulem2	GO:0043487	regulation of RNA stability	2.70305e-05	HNRNPA0/RBM10/DHX9/HNRNPU/ELAVL1/HNRNPR/IGF2BP1	7
modulem2	GO:0031440	regulation of mRNA 3'-end processing	2.90602e-05	SNRPA/NCBP2/NCBP1/NUDT21	4
modulem2	GO:0016973	poly(A)+ mRNA export from nucleus	3.17806e-05	ZC3H11A/PABPN1/THOC2	3
modulem2	GO:0098787	mRNA cleavage involved in mRNA processing	3.17806e-05	NCBP2/NCBP1/NUDT21	3
modulem2	GO:0050685	positive regulation of mRNA processing	3.75002e-05	NCBP2/NCBP1/NUDT21/RBMX	4
modulem2	GO:1903313	positive regulation of mRNA metabolic process	7.08739e-05	NCBP2/NCBP1/NUDT21/HNRNPR/RBMX	5
modulem2	GO:0031442	positive regulation of mRNA 3'-end processing	8.67183e-05	NCBP2/NCBP1/NUDT21	3
modulem2	GO:0046831	regulation of RNA export from nucleus	8.67183e-05	NCBP2/DHX9/KHDRBS1	3
modulem2	GO:0006378	mRNA polyadenylation	8.79173e-05	SNRPA/NUDT21/CSTF2/CSTF3	4
modulem2	GO:0009895	negative regulation of catabolic process	0.000105233	SF3B3/HNRNPA0/RBM10/DHX9/HNRNPU/ELAVL1/IGF2BP1/DHX34	8
modulem2	GO:0043631	RNA polyadenylation	0.000106792	SNRPA/NUDT21/CSTF2/CSTF3	4
modulem2	GO:0032239	regulation of nucleobase-containing compound transport	0.000140187	NCBP2/DHX9/KHDRBS1	3
modulem2	GO:0070935	3'-UTR-mediated mRNA stabilization	0.000218457	HNRNPA0/RBM10/ELAVL1	3
modulem2	GO:0031330	negative regulation of cellular catabolic process	0.000303476	HNRNPA0/RBM10/DHX9/HNRNPU/ELAVL1/IGF2BP1/DHX34	7
modulem2	GO:0000387	spliceosomal snRNP assembly	0.000337983	PRPF3/PRPF8/SNRPC/SRSF10	4
modulem2	GO:0006354	DNA-templated transcription, elongation	0.000426782	HTATSF1/NCBP2/NCBP1/GTF2F1/HNRNPU	5
modulem2	GO:0006417	regulation of translation	0.000928991	NCBP2/NCBP1/RBM4/DHX9/ELAVL1/HNRNPR/IGF2BP1/KHDRBS1	8
modulem2	GO:0000244	spliceosomal tri-snRNP complex assembly	0.000999151	PRPF3/PRPF8/SRSF10	3
modulem2	GO:0006446	regulation of translational initiation	0.00113698	NCBP2/NCBP1/RBM4/KHDRBS1	4
modulem2	GO:0033120	positive regulation of RNA splicing	0.00182057	U2AF2/NCBP1/RBMX	3
modulem2	GO:2000371	regulation of DNA topoisomerase (ATP-hydrolyzing) activity	0.00182057	DHX9/HNRNPU	2
modulem2	GO:2000373	positive regulation of DNA topoisomerase (ATP-hydrolyzing) activity	0.00182057	DHX9/HNRNPU	2
modulem2	GO:0006368	transcription elongation from RNA polymerase II promoter	0.00182057	NCBP2/NCBP1/GTF2F1/HNRNPU	4
modulem2	GO:0034248	regulation of cellular amide metabolic process	0.00205416	NCBP2/NCBP1/RBM4/DHX9/ELAVL1/HNRNPR/IGF2BP1/KHDRBS1	8
modulem2	GO:0006370	7-methylguanosine mRNA capping	0.00211049	NCBP2/NCBP1/GTF2F1	3
modulem2	GO:0009452	7-methylguanosine RNA capping	0.00225029	NCBP2/NCBP1/GTF2F1	3
modulem2	GO:0036260	RNA capping	0.00225029	NCBP2/NCBP1/GTF2F1	3
modulem2	GO:0045292	mRNA cis splicing, via spliceosome	0.00242421	NCBP2/NCBP1/PRPF40A	3
modulem2	GO:0032784	regulation of DNA-templated transcription, elongation	0.00330878	HTATSF1/GTF2F1/HNRNPU	3
modulem2	GO:0010911	regulation of isomerase activity	0.00390552	DHX9/HNRNPU	2
modulem2	GO:0010912	positive regulation of isomerase activity	0.00390552	DHX9/HNRNPU	2
modulem2	GO:0006376	mRNA splice site selection	0.00396026	SRSF10/SF3A2/YTHDC1	3
modulem2	GO:0046822	regulation of nucleocytoplasmic transport	0.00396026	NCBP2/RBM4/DHX9/KHDRBS1	4
modulem2	GO:0048524	positive regulation of viral process	0.00437763	GTF2F1/DHX9/STOM/SRPK2	4
modulem2	GO:0035722	interleukin-12-mediated signaling pathway	0.00529637	SNRPA1/HNRNPDL/HNRNPF	3
modulem2	GO:0008543	fibroblast growth factor receptor signaling pathway	0.00529637	NCBP2/NCBP1/GTF2F1/HNRNPF	4
modulem2	GO:0071349	cellular response to interleukin-12	0.00591586	SNRPA1/HNRNPDL/HNRNPF	3
modulem2	GO:0070671	response to interleukin-12	0.00620748	SNRPA1/HNRNPDL/HNRNPF	3
modulem2	GO:0000184	nuclear-transcribed mRNA catabolic process, nonsense-mediated decay	0.00689481	NCBP2/NCBP1/RNPS1/DHX34	4
modulem2	GO:0019079	viral genome replication	0.00726102	HTATSF1/PCBP1/STOM/SRPK2	4
modulem2	GO:1900363	regulation of mRNA polyadenylation	0.0100127	SNRPA/NUDT21	2
modulem2	GO:0046824	positive regulation of nucleocytoplasmic transport	0.0100127	NCBP2/DHX9/KHDRBS1	3
modulem2	GO:0090501	RNA phosphodiester bond hydrolysis	0.0100127	NCBP2/NCBP1/NUDT21/CSTF3	4
modulem2	GO:0009048	dosage compensation by inactivation of X chromosome	0.0110725	HNRNPU/YTHDC1	2
modulem2	GO:0044344	cellular response to fibroblast growth factor stimulus	0.0115493	NCBP2/NCBP1/GTF2F1/HNRNPF	4
modulem2	GO:0071774	response to fibroblast growth factor	0.0134895	NCBP2/NCBP1/GTF2F1/HNRNPF	4
modulem2	GO:0007549	dosage compensation	0.0134895	HNRNPU/YTHDC1	2
modulem2	GO:0048026	positive regulation of mRNA splicing, via spliceosome	0.0134895	NCBP1/RBMX	2
modulem2	GO:0042795	snRNA transcription by RNA polymerase II	0.0152793	NCBP2/NCBP1/GTF2F1	3
modulem2	GO:0009301	snRNA transcription	0.0157467	NCBP2/NCBP1/GTF2F1	3
modulem2	GO:0016073	snRNA metabolic process	0.0188816	NCBP2/NCBP1/GTF2F1	3
modulem2	GO:0034243	regulation of transcription elongation from RNA polymerase II promoter	0.0194009	GTF2F1/HNRNPU	2
modulem2	GO:0008334	histone mRNA metabolic process	0.0217104	NCBP2/NCBP1	2
modulem2	GO:0010610	regulation of mRNA stability involved in response to stress	0.0217104	IGF2BP1	1
modulem2	GO:0022013	pallium cell proliferation in forebrain	0.0217104	IGF2BP1	1
modulem2	GO:0031437	regulation of mRNA cleavage	0.0217104	NUDT21	1
modulem2	GO:0031439	positive regulation of mRNA cleavage	0.0217104	NUDT21	1
modulem2	GO:0039695	DNA-templated viral transcription	0.0217104	DHX9	1
modulem2	GO:1901585	regulation of acid-sensing ion channel activity	0.0217104	STOM	1
modulem2	GO:1902889	protein localization to spindle microtubule	0.0217104	HNRNPU	1
modulem2	GO:1904247	positive regulation of polynucleotide adenylyltransferase activity	0.0217104	PABPN1	1
modulem2	GO:1904971	regulation of viral translation	0.0217104	DHX9	1
modulem2	GO:1904973	positive regulation of viral translation	0.0217104	DHX9	1
modulem2	GO:1905698	positive regulation of polysome binding	0.0217104	DHX9	1
modulem2	GO:1990280	RNA localization to chromatin	0.0217104	HNRNPU	1
modulem2	GO:2000975	positive regulation of pro-B cell differentiation	0.0217104	NUDT21	1
modulem2	GO:0043902	positive regulation of multi-organism process	0.0245826	GTF2F1/DHX9/STOM/SRPK2	4
modulem2	GO:0006413	translational initiation	0.0258488	NCBP2/NCBP1/RBM4/KHDRBS1	4
modulem2	GO:0008608	attachment of spindle microtubules to kinetochore	0.0288329	HNRNPU/ZNF207	2
modulem2	GO:0000956	nuclear-transcribed mRNA catabolic process	0.0329603	NCBP2/NCBP1/RNPS1/DHX34	4
modulem2	GO:0032388	positive regulation of intracellular transport	0.0363042	NCBP2/DHX9/STOM/KHDRBS1	4
modulem2	GO:0098781	ncRNA transcription	0.03634	NCBP2/NCBP1/GTF2F1	3
modulem2	GO:0050792	regulation of viral process	0.03634	GTF2F1/DHX9/STOM/SRPK2	4
modulem2	GO:0034660	ncRNA metabolic process	0.0373321	MYBL1/NCBP2/NCBP1/GTF2F1/WBP11/CSTF2	6
modulem2	GO:0045070	positive regulation of viral genome replication	0.0373321	STOM/SRPK2	2
modulem2	GO:0002192	IRES-dependent translational initiation of linear mRNA	0.0373321	RBM4	1
modulem2	GO:0006408	snRNA export from nucleus	0.0373321	NCBP2	1
modulem2	GO:0046778	modification by virus of host mRNA processing	0.0373321	PABPN1	1
modulem2	GO:0072369	regulation of lipid transport by positive regulation of transcription from RNA polymerase II promoter	0.0373321	HNRNPK	1
modulem2	GO:0110017	cap-independent translational initiation of linear mRNA	0.0373321	RBM4	1
modulem2	GO:1902423	regulation of attachment of mitotic spindle microtubules to kinetochore	0.0373321	HNRNPU	1
modulem2	GO:1902425	positive regulation of attachment of mitotic spindle microtubules to kinetochore	0.0373321	HNRNPU	1
modulem2	GO:1904245	regulation of polynucleotide adenylyltransferase activity	0.0373321	PABPN1	1
modulem2	GO:1905458	positive regulation of lymphoid progenitor cell differentiation	0.0373321	NUDT21	1
modulem2	GO:1905696	regulation of polysome binding	0.0373321	DHX9	1
modulem2	GO:0045727	positive regulation of translation	0.0452255	DHX9/ELAVL1/KHDRBS1	3
modulem2	GO:0050434	positive regulation of viral transcription	0.0492962	GTF2F1/DHX9	2
modulem2	GO:0043903	regulation of symbiosis, encompassing mutualism through parasitism	0.0505271	GTF2F1/DHX9/STOM/SRPK2	4
modulem2	GO:0035063	nuclear speck organization	0.0524524	SRPK2	1
modulem2	GO:0039656	modulation by virus of host gene expression	0.0524524	PABPN1	1
modulem2	GO:0098961	dendritic transport of ribonucleoprotein complex	0.0524524	HNRNPU	1
modulem2	GO:0098963	dendritic transport of messenger ribonucleoprotein complex	0.0524524	HNRNPU	1
modulem2	GO:1903241	U2-type prespliceosome assembly	0.0524524	SF3A2	1
modulem2	GO:1990120	messenger ribonucleoprotein complex assembly	0.0524524	NUDT21	1
modulem2	GO:0034250	positive regulation of cellular amide metabolic process	0.0649205	DHX9/ELAVL1/KHDRBS1	3
modulem2	GO:0030423	targeting of mRNA for destruction involved in RNA interference	0.0649205	DHX9	1
modulem2	GO:0035549	positive regulation of interferon-beta secretion	0.0649205	DHX9	1
modulem2	GO:0045716	positive regulation of low-density lipoprotein particle receptor biosynthetic process	0.0649205	HNRNPK	1
modulem2	GO:0051030	snRNA transport	0.0649205	NCBP2	1
modulem2	GO:0072367	regulation of lipid transport by regulation of transcription from RNA polymerase II promoter	0.0649205	HNRNPK	1
modulem2	GO:0097167	circadian regulation of translation	0.0649205	RBM4	1
modulem2	GO:0110104	mRNA alternative polyadenylation	0.0649205	NUDT21	1
modulem2	GO:1900365	positive regulation of mRNA polyadenylation	0.0649205	NUDT21	1
modulem2	GO:2000622	regulation of nuclear-transcribed mRNA catabolic process, nonsense-mediated decay	0.0649205	DHX34	1
modulem2	GO:2000623	negative regulation of nuclear-transcribed mRNA catabolic process, nonsense-mediated decay	0.0649205	DHX34	1
modulem2	GO:0032781	positive regulation of ATPase activity	0.0658848	DHX9/HNRNPU	2
modulem2	GO:0032386	regulation of intracellular transport	0.0664345	NCBP2/RBM4/DHX9/STOM/KHDRBS1	5
modulem2	GO:0090307	mitotic spindle assembly	0.067507	HNRNPU/ZNF207	2
modulem2	GO:0090305	nucleic acid phosphodiester bond hydrolysis	0.0713022	NCBP2/NCBP1/NUDT21/CSTF3	4
modulem2	GO:0000389	mRNA 3'-splice site recognition	0.075254	SF3A2	1
modulem2	GO:0002190	cap-independent translational initiation	0.075254	RBM4	1
modulem2	GO:0032741	positive regulation of interleukin-18 production	0.075254	DHX9	1
modulem2	GO:0035546	interferon-beta secretion	0.075254	DHX9	1
modulem2	GO:0035547	regulation of interferon-beta secretion	0.075254	DHX9	1
modulem2	GO:0051987	positive regulation of attachment of spindle microtubules to kinetochore	0.075254	HNRNPU	1
modulem2	GO:1901534	positive regulation of hematopoietic progenitor cell differentiation	0.075254	NUDT21	1
modulem2	GO:1990511	piRNA biosynthetic process	0.075254	MYBL1	1
modulem2	GO:0033047	regulation of mitotic sister chromatid segregation	0.0755926	HNRNPU/ZNF207	2
modulem2	GO:1903902	positive regulation of viral life cycle	0.0801935	STOM/SRPK2	2
modulem2	GO:0048511	rhythmic process	0.0835634	RBM4/DHX9/HNRNPU/HNRNPR	4
modulem2	GO:0032055	negative regulation of translation in response to stress	0.0875534	RBM4	1
modulem2	GO:0098935	dendritic transport	0.0875534	HNRNPU	1
modulem2	GO:0046782	regulation of viral transcription	0.0912678	GTF2F1/DHX9	2
modulem2	GO:0032914	positive regulation of transforming growth factor beta1 production	0.0953854	ATP6AP2	1
modulem2	GO:0044806	G-quadruplex DNA unwinding	0.0953854	DHX9	1
modulem2	GO:0044829	positive regulation by host of viral genome replication	0.0953854	STOM	1
modulem2	GO:0048069	eye pigmentation	0.0953854	ATP6AP2	1
modulem2	GO:0070269	pyroptosis	0.0953854	DHX9	1
modulem2	GO:0072642	interferon-alpha secretion	0.0953854	DHX9	1
modulem2	GO:0090235	regulation of metaphase plate congression	0.0953854	HNRNPU	1
modulem2	GO:1902739	regulation of interferon-alpha secretion	0.0953854	DHX9	1
modulem2	GO:1902741	positive regulation of interferon-alpha secretion	0.0953854	DHX9	1
modulem2	GO:1903608	protein localization to cytoplasmic stress granule	0.0953854	DHX9	1
modulem2	GO:2000973	regulation of pro-B cell differentiation	0.0953854	NUDT21	1
modulem2	GO:0002181	cytoplasmic translation	0.0982512	RBM4/DHX9	2
modulem2	GO:0033045	regulation of sister chromatid segregation	0.100371	HNRNPU/ZNF207	2
modulem2	GO:0043462	regulation of ATPase activity	0.103795	DHX9/HNRNPU	2
modulem2	GO:0010501	RNA secondary structure unwinding	0.103795	DHX9	1
modulem2	GO:0032661	regulation of interleukin-18 production	0.103795	DHX9	1
modulem2	GO:0046784	viral mRNA export from host cell nucleus	0.103795	THOC2	1
modulem2	GO:0072641	type I interferon secretion	0.103795	DHX9	1
modulem2	GO:1905216	positive regulation of RNA binding	0.103795	NCBP1	1
modulem2	GO:1905456	regulation of lymphoid progenitor cell differentiation	0.103795	NUDT21	1
modulem2	GO:0019058	viral life cycle	0.108198	HTATSF1/PCBP1/STOM/SRPK2	4
modulem2	GO:0032508	DNA duplex unwinding	0.111487	DHX9/ASCC3	2
modulem2	GO:0044417	translocation of molecules into host	0.113083	THOC2	1
modulem2	GO:0045714	regulation of low-density lipoprotein particle receptor biosynthetic process	0.113083	HNRNPK	1
modulem2	GO:0051836	translocation of molecules into other organism involved in symbiotic interaction	0.113083	THOC2	1
modulem2	GO:0070922	small RNA loading onto RISC	0.113083	DHX9	1
modulem2	GO:0017148	negative regulation of translation	0.120623	RBM4/HNRNPR/IGF2BP1	3
modulem2	GO:0006307	DNA dealkylation involved in DNA repair	0.120623	ASCC3	1
modulem2	GO:0032621	interleukin-18 production	0.120623	DHX9	1
modulem2	GO:0034244	negative regulation of transcription elongation from RNA polymerase II promoter	0.120623	HNRNPU	1
modulem2	GO:0045713	low-density lipoprotein particle receptor biosynthetic process	0.120623	HNRNPK	1
modulem2	GO:0051315	attachment of mitotic spindle microtubules to kinetochore	0.120623	HNRNPU	1
modulem2	GO:0090336	positive regulation of brown fat cell differentiation	0.120623	HNRNPU	1
modulem2	GO:2000767	positive regulation of cytoplasmic translation	0.120623	DHX9	1
modulem2	GO:0007623	circadian rhythm	0.123029	RBM4/HNRNPU/HNRNPR	3
modulem2	GO:0032392	DNA geometric change	0.128157	DHX9/ASCC3	2
modulem2	GO:0002328	pro-B cell differentiation	0.128157	NUDT21	1
modulem2	GO:0010870	positive regulation of receptor biosynthetic process	0.128157	HNRNPK	1
modulem2	GO:0021903	rostrocaudal neural tube patterning	0.128157	ATP6AP2	1
modulem2	GO:0032908	regulation of transforming growth factor beta1 production	0.128157	ATP6AP2	1
modulem2	GO:1905214	regulation of RNA binding	0.128157	NCBP1	1
modulem2	GO:0051225	spindle assembly	0.134575	HNRNPU/ZNF207	2
modulem2	GO:0002002	regulation of angiotensin levels in blood	0.134575	ATP6AP2	1
modulem2	GO:0002003	angiotensin maturation	0.134575	ATP6AP2	1
modulem2	GO:0032785	negative regulation of DNA-templated transcription, elongation	0.134575	HNRNPU	1
modulem2	GO:0032905	transforming growth factor beta1 production	0.134575	ATP6AP2	1
modulem2	GO:0032968	positive regulation of transcription elongation from RNA polymerase II promoter	0.134575	GTF2F1	1
modulem2	GO:0051988	regulation of attachment of spindle microtubules to kinetochore	0.134575	HNRNPU	1
modulem2	GO:0099640	axo-dendritic protein transport	0.134575	HNRNPU	1
modulem2	GO:0034249	negative regulation of cellular amide metabolic process	0.138926	RBM4/HNRNPR/IGF2BP1	3
modulem2	GO:0051983	regulation of chromosome segregation	0.140285	HNRNPU/ZNF207	2
modulem2	GO:0016246	RNA interference	0.142353	DHX9	1
modulem2	GO:0044794	positive regulation by host of viral process	0.142353	STOM	1
modulem2	GO:0062033	positive regulation of mitotic sister chromatid segregation	0.142353	HNRNPU	1
modulem2	GO:0007052	mitotic spindle organization	0.142503	HNRNPU/ZNF207	2
modulem2	GO:0045069	regulation of viral genome replication	0.142503	STOM/SRPK2	2
modulem2	GO:0001649	osteoblast differentiation	0.142503	DHX9/HNRNPU/RBMX	3
modulem2	GO:0019081	viral translation	0.149762	DHX9	1
modulem2	GO:0035372	protein localization to microtubule	0.149762	HNRNPU	1
modulem3	GO:0042254	ribosome biogenesis	1.46879e-31	TEX10/SENP3/PES1/RPF2/SDAD1/NMD3/NOP14/NOL9/WDR3/NOC4L/UTP14C/EXOSC10/HEATR1/RIOK3/RRP36/BYSL/DDX21/GNL2/DDX47/GNL3L/DDX17/BMS1	22
modulem3	GO:0034470	ncRNA processing	3.17156e-26	TEX10/SENP3/PES1/NOP14/NOL9/WDR3/NOC4L/UTP14C/TRMT11/EXOSC10/HEATR1/RIOK3/TRMT6/RRP36/PUS7/BYSL/FTSJ1/DDX21/DDX47/DDX17/BMS1	21
modulem3	GO:0022613	ribonucleoprotein complex biogenesis	8.63098e-26	TEX10/SENP3/PES1/RPF2/SDAD1/NMD3/NOP14/NOL9/WDR3/NOC4L/UTP14C/EXOSC10/HEATR1/RIOK3/RRP36/BYSL/DDX21/GNL2/DDX47/GNL3L/DDX17/BMS1	22
modulem3	GO:0006364	rRNA processing	4.42434e-24	TEX10/SENP3/PES1/NOP14/NOL9/WDR3/NOC4L/UTP14C/EXOSC10/HEATR1/RIOK3/RRP36/BYSL/DDX21/DDX47/DDX17/BMS1	17
modulem3	GO:0016072	rRNA metabolic process	1.58862e-22	TEX10/SENP3/PES1/NOP14/NOL9/WDR3/NOC4L/UTP14C/EXOSC10/HEATR1/RIOK3/RRP36/BYSL/DDX21/DDX47/DDX17/BMS1	17
modulem3	GO:0034660	ncRNA metabolic process	2.44884e-22	TEX10/SENP3/PES1/NOP14/NOL9/WDR3/NOC4L/UTP14C/TRMT11/EXOSC10/HEATR1/RIOK3/TRMT6/RRP36/PUS7/BYSL/FTSJ1/DDX21/DDX47/DDX17/BMS1	21
modulem3	GO:0000460	maturation of 5.8S rRNA	4.48788e-07	PES1/NOP14/NOL9/EXOSC10	4
modulem3	GO:0042274	ribosomal small subunit biogenesis	8.28185e-06	NOP14/RIOK3/RRP36/BYSL	4
modulem3	GO:0030490	maturation of SSU-rRNA	0.000105977	NOP14/RIOK3/BYSL	3
modulem3	GO:1902570	protein localization to nucleolus	0.00012122	RPF2/NMD3/BYSL	3
modulem3	GO:0006400	tRNA modification	0.000280101	TRMT11/TRMT6/PUS7/FTSJ1	4
modulem3	GO:0030488	tRNA methylation	0.000553755	TRMT11/TRMT6/FTSJ1	3
modulem3	GO:0042273	ribosomal large subunit biogenesis	0.000735557	PES1/RPF2/SDAD1	3
modulem3	GO:0000055	ribosomal large subunit export from nucleus	0.000739978	SDAD1/NMD3	2
modulem3	GO:0000054	ribosomal subunit export from nucleus	0.00146953	SDAD1/NMD3	2
modulem3	GO:0000466	maturation of 5.8S rRNA from tricistronic rRNA transcript (SSU-rRNA, 5.8S rRNA, LSU-rRNA)	0.00146953	PES1/NOP14	2
modulem3	GO:0033750	ribosome localization	0.00146953	SDAD1/NMD3	2
modulem3	GO:0008033	tRNA processing	0.00146953	TRMT11/TRMT6/PUS7/FTSJ1	4
modulem3	GO:0000462	maturation of SSU-rRNA from tricistronic rRNA transcript (SSU-rRNA, 5.8S rRNA, LSU-rRNA)	0.00171988	NOP14/BYSL	2
modulem3	GO:0000469	cleavage involved in rRNA processing	0.00171988	NOP14/RRP36	2
modulem3	GO:0071428	rRNA-containing ribonucleoprotein complex export from nucleus	0.00171988	SDAD1/NMD3	2
modulem3	GO:0009451	RNA modification	0.00202103	TRMT11/TRMT6/PUS7/FTSJ1	4
modulem3	GO:1904749	regulation of protein localization to nucleolus	0.00209104	NMD3/BYSL	2
modulem3	GO:0001510	RNA methylation	0.00362332	TRMT11/TRMT6/FTSJ1	3
modulem3	GO:1904816	positive regulation of protein localization to chromosome, telomeric region	0.00451101	GNL3/GNL3L	2
modulem3	GO:0006399	tRNA metabolic process	0.00516098	TRMT11/TRMT6/PUS7/FTSJ1	4
modulem3	GO:1904814	regulation of protein localization to chromosome, telomeric region	0.00574403	GNL3/GNL3L	2
modulem3	GO:0032204	regulation of telomere maintenance	0.00857517	EXOSC10/GNL3/GNL3L	3
modulem3	GO:0016556	mRNA modification	0.00894481	TRMT6/PUS7	2
modulem3	GO:0032211	negative regulation of telomere maintenance via telomerase	0.0107098	EXOSC10/GNL3L	2
modulem3	GO:0033233	regulation of protein sumoylation	0.0125681	GNL3/GNL3L	2
modulem3	GO:1904357	negative regulation of telomere maintenance via telomere lengthening	0.0183803	EXOSC10/GNL3L	2
modulem3	GO:0070198	protein localization to chromosome, telomeric region	0.0191694	GNL3/GNL3L	2
modulem3	GO:0002128	tRNA nucleoside ribose methylation	0.0226666	FTSJ1	1
modulem3	GO:0071030	nuclear mRNA surveillance of spliceosomal pre-mRNA splicing	0.0226666	EXOSC10	1
modulem3	GO:0071033	nuclear retention of pre-mRNA at the site of transcription	0.0226666	EXOSC10	1
modulem3	GO:0071048	nuclear retention of unspliced pre-mRNA at the site of transcription	0.0226666	EXOSC10	1
modulem3	GO:0072752	cellular response to rapamycin	0.0226666	LARP1	1
modulem3	GO:2001251	negative regulation of chromosome organization	0.0231763	EXOSC10/NOC2L/GNL3L	3
modulem3	GO:0043414	macromolecule methylation	0.0251252	PRMT3/TRMT11/TRMT6/FTSJ1	4
modulem3	GO:0032205	negative regulation of telomere maintenance	0.0251252	EXOSC10/GNL3L	2
modulem3	GO:0090501	RNA phosphodiester bond hydrolysis	0.0251252	NOP14/EXOSC10/RRP36	3
modulem3	GO:0001825	blastocyst formation	0.0258067	RPL7L1/BYSL	2
modulem3	GO:0043331	response to dsRNA	0.0258067	RIOK3/DDX21	2
modulem3	GO:2000279	negative regulation of DNA biosynthetic process	0.0258067	EXOSC10/GNL3L	2
modulem3	GO:0033044	regulation of chromosome organization	0.0307309	EXOSC10/NOC2L/GNL3/GNL3L	4
modulem3	GO:0000723	telomere maintenance	0.0307309	EXOSC10/GNL3/GNL3L	3
modulem3	GO:0000472	endonucleolytic cleavage to generate mature 5'-end of SSU-rRNA from (SSU-rRNA, 5.8S rRNA, LSU-rRNA)	0.0307309	NOP14	1
modulem3	GO:0000967	rRNA 5'-end processing	0.0307309	NOP14	1
modulem3	GO:0071029	nuclear ncRNA surveillance	0.0307309	EXOSC10	1
modulem3	GO:0071035	nuclear polyadenylation-dependent rRNA catabolic process	0.0307309	EXOSC10	1
modulem3	GO:0071046	nuclear polyadenylation-dependent ncRNA catabolic process	0.0307309	EXOSC10	1
modulem3	GO:1901355	response to rapamycin	0.0307309	LARP1	1
modulem3	GO:1990481	mRNA pseudouridine synthesis	0.0307309	PUS7	1
modulem3	GO:1990784	response to dsDNA	0.0307309	RIOK3	1
modulem3	GO:1990786	cellular response to dsDNA	0.0307309	RIOK3	1
modulem3	GO:0045815	positive regulation of gene expression, epigenetic	0.030965	POLR1E/DDX21	2
modulem3	GO:0032200	telomere organization	0.034843	EXOSC10/GNL3/GNL3L	3
modulem3	GO:0032259	methylation	0.034843	PRMT3/TRMT11/TRMT6/FTSJ1	4
modulem3	GO:0032210	regulation of telomere maintenance via telomerase	0.0372084	EXOSC10/GNL3L	2
modulem3	GO:0000447	endonucleolytic cleavage in ITS1 to separate SSU-rRNA from 5.8S rRNA and LSU-rRNA from tricistronic rRNA transcript (SSU-rRNA, 5.8S rRNA, LSU-rRNA)	0.0396738	NOP14	1
modulem3	GO:0031119	tRNA pseudouridine synthesis	0.0396738	PUS7	1
modulem3	GO:0043634	polyadenylation-dependent ncRNA catabolic process	0.0396738	EXOSC10	1
modulem3	GO:0071034	CUT catabolic process	0.0396738	EXOSC10	1
modulem3	GO:0071043	CUT metabolic process	0.0396738	EXOSC10	1
modulem3	GO:1904356	regulation of telomere maintenance via telomere lengthening	0.0444582	EXOSC10/GNL3L	2
modulem3	GO:0006360	transcription by RNA polymerase I	0.0451959	HEATR1/POLR1E	2
modulem3	GO:0000463	maturation of LSU-rRNA from tricistronic rRNA transcript (SSU-rRNA, 5.8S rRNA, LSU-rRNA)	0.0470541	PES1	1
modulem3	GO:0000470	maturation of LSU-rRNA	0.0470541	PES1	1
modulem3	GO:0000480	endonucleolytic cleavage in 5'-ETS of tricistronic rRNA transcript (SSU-rRNA, 5.8S rRNA, LSU-rRNA)	0.0470541	NOP14	1
modulem3	GO:0039534	negative regulation of MDA-5 signaling pathway	0.0470541	RIOK3	1
modulem3	GO:0043633	polyadenylation-dependent RNA catabolic process	0.0470541	EXOSC10	1
modulem3	GO:1904751	positive regulation of protein localization to nucleolus	0.0470541	NMD3	1
modulem3	GO:0007004	telomere maintenance via telomerase	0.0475368	EXOSC10/GNL3L	2
modulem3	GO:0006403	RNA localization	0.0498665	SDAD1/NMD3/EXOSC10	3
modulem3	GO:0006278	RNA-dependent DNA biosynthetic process	0.0529552	EXOSC10/GNL3L	2
modulem3	GO:0000478	endonucleolytic cleavage involved in rRNA processing	0.0529552	NOP14	1
modulem3	GO:0000479	endonucleolytic cleavage of tricistronic rRNA transcript (SSU-rRNA, 5.8S rRNA, LSU-rRNA)	0.0529552	NOP14	1
modulem3	GO:0071027	nuclear RNA surveillance	0.0529552	EXOSC10	1
modulem3	GO:0071028	nuclear mRNA surveillance	0.0529552	EXOSC10	1
modulem3	GO:0071362	cellular response to ether	0.0529552	LARP1	1
modulem3	GO:0031397	negative regulation of protein ubiquitination	0.0537734	PRMT3/GNL3L	2
modulem3	GO:0034504	protein localization to nucleus	0.0537734	RPF2/NMD3/BYSL	3
modulem3	GO:1903320	regulation of protein modification by small protein conjugation or removal	0.0537734	PRMT3/GNL3/GNL3L	3
modulem3	GO:0016925	protein sumoylation	0.0554161	GNL3/GNL3L	2
modulem3	GO:0010833	telomere maintenance via telomere lengthening	0.0561219	EXOSC10/GNL3L	2
modulem3	GO:0051607	defense response to virus	0.0569488	RIOK3/DDX21/DDX17	3
modulem3	GO:0002372	myeloid dendritic cell cytokine production	0.0569488	DDX21	1
modulem3	GO:0002733	regulation of myeloid dendritic cell cytokine production	0.0569488	DDX21	1
modulem3	GO:0002735	positive regulation of myeloid dendritic cell cytokine production	0.0569488	DDX21	1
modulem3	GO:0034502	protein localization to chromosome	0.0569488	GNL3/GNL3L	2
modulem3	GO:1903321	negative regulation of protein modification by small protein conjugation or removal	0.0616758	PRMT3/GNL3L	2
modulem3	GO:0002732	positive regulation of dendritic cell cytokine production	0.0624278	DDX21	1
modulem3	GO:0007000	nucleolus organization	0.0624278	PES1	1
modulem3	GO:0039533	regulation of MDA-5 signaling pathway	0.0624278	RIOK3	1
modulem3	GO:0071025	RNA surveillance	0.0624278	EXOSC10	1
modulem3	GO:0032092	positive regulation of protein binding	0.0678522	NMD3/GNL3L	2
modulem3	GO:0008298	intracellular mRNA localization	0.06982	EXOSC10	1
modulem3	GO:0090305	nucleic acid phosphodiester bond hydrolysis	0.0740575	NOP14/EXOSC10/RRP36	3
modulem3	GO:0001824	blastocyst development	0.0740575	RPL7L1/BYSL	2
modulem3	GO:0001188	RNA polymerase I preinitiation complex assembly	0.0746595	POLR1E	1
modulem3	GO:0090070	positive regulation of ribosome biogenesis	0.0746595	HEATR1	1
modulem3	GO:2000234	positive regulation of rRNA processing	0.0746595	HEATR1	1
modulem3	GO:2000278	regulation of DNA biosynthetic process	0.0809573	EXOSC10/GNL3L	2
modulem3	GO:0039530	MDA-5 signaling pathway	0.0812933	RIOK3	1
modulem3	GO:0002730	regulation of dendritic cell cytokine production	0.0830086	DDX21	1
modulem3	GO:0016075	rRNA catabolic process	0.0830086	EXOSC10	1
modulem3	GO:0032463	negative regulation of protein homooligomerization	0.0830086	RIOK3	1
modulem3	GO:0033234	negative regulation of protein sumoylation	0.0830086	GNL3L	1
modulem3	GO:0033235	positive regulation of protein sumoylation	0.0830086	GNL3	1
modulem3	GO:0039532	negative regulation of viral-induced cytoplasmic pattern recognition receptor signaling pathway	0.0830086	RIOK3	1
modulem3	GO:0071044	histone mRNA catabolic process	0.0830086	EXOSC10	1
modulem3	GO:0090073	positive regulation of protein homodimerization activity	0.0830086	GNL3L	1
modulem3	GO:0071426	ribonucleoprotein complex export from nucleus	0.085187	SDAD1/NMD3	2
modulem3	GO:0071166	ribonucleoprotein complex localization	0.085187	SDAD1/NMD3	2
modulem3	GO:1900180	regulation of protein localization to nucleus	0.085187	NMD3/BYSL	2
modulem3	GO:0002371	dendritic cell cytokine production	0.085187	DDX21	1
modulem3	GO:0002903	negative regulation of B cell apoptotic process	0.085187	NOC2L	1
modulem3	GO:0045472	response to ether	0.085187	LARP1	1
modulem3	GO:2000232	regulation of rRNA processing	0.085187	HEATR1	1
modulem3	GO:0006405	RNA export from nucleus	0.0904112	SDAD1/NMD3	2
modulem3	GO:0090069	regulation of ribosome biogenesis	0.0906821	HEATR1	1
modulem3	GO:1903829	positive regulation of cellular protein localization	0.0935782	NMD3/GNL3/GNL3L	3
modulem3	GO:0001522	pseudouridine synthesis	0.0943255	PUS7	1
modulem3	GO:0035067	negative regulation of histone acetylation	0.0943255	NOC2L	1
modulem3	GO:0080009	mRNA methylation	0.0943255	TRMT6	1
modulem3	GO:0009615	response to virus	0.0943255	RIOK3/DDX21/DDX17	3
modulem3	GO:0001829	trophectodermal cell differentiation	0.099529	BYSL	1
modulem3	GO:0009048	dosage compensation by inactivation of X chromosome	0.105236	EXOSC10	1
modulem3	GO:0051053	negative regulation of DNA metabolic process	0.109163	EXOSC10/GNL3L	2
modulem3	GO:0002902	regulation of B cell apoptotic process	0.109163	NOC2L	1
modulem3	GO:2000757	negative regulation of peptidyl-lysine acetylation	0.109163	NOC2L	1
modulem3	GO:0010639	negative regulation of organelle organization	0.109653	EXOSC10/NOC2L/GNL3L	3
modulem3	GO:0006337	nucleosome disassembly	0.109653	GRWD1	1
modulem3	GO:0007549	dosage compensation	0.109653	EXOSC10	1
modulem3	GO:0032460	negative regulation of protein oligomerization	0.109653	RIOK3	1
modulem3	GO:0034471	ncRNA 5'-end processing	0.109653	NOP14	1
modulem3	GO:0045947	negative regulation of translational initiation	0.109653	LARP1	1
modulem3	GO:1904872	regulation of telomerase RNA localization to Cajal body	0.109653	EXOSC10	1
modulem3	GO:0061081	positive regulation of myeloid leukocyte cytokine production involved in immune response	0.111615	DDX21	1
modulem3	GO:0090670	RNA localization to Cajal body	0.111615	EXOSC10	1
modulem3	GO:0090671	telomerase RNA localization to Cajal body	0.111615	EXOSC10	1
modulem3	GO:0090672	telomerase RNA localization	0.111615	EXOSC10	1
modulem3	GO:0090685	RNA localization to nucleus	0.111615	EXOSC10	1
modulem3	GO:0031497	chromatin assembly	0.112677	NOC2L/GRWD1	2
modulem3	GO:0000966	RNA 5'-end processing	0.112677	NOP14	1
modulem3	GO:0031498	chromatin disassembly	0.112677	GRWD1	1
modulem3	GO:0032986	protein-DNA complex disassembly	0.112677	GRWD1	1
modulem3	GO:2000380	regulation of mesoderm development	0.112677	PUS7	1
modulem3	GO:2001014	regulation of skeletal muscle cell differentiation	0.112677	DDX17	1
modulem3	GO:0018205	peptidyl-lysine modification	0.115122	NOC2L/GNL3/GNL3L	3
modulem3	GO:0032462	regulation of protein homooligomerization	0.115122	RIOK3	1
modulem3	GO:0039531	regulation of viral-induced cytoplasmic pattern recognition receptor signaling pathway	0.115122	RIOK3	1
modulem3	GO:1901984	negative regulation of protein acetylation	0.115122	NOC2L	1
modulem3	GO:0043496	regulation of protein homodimerization activity	0.117519	GNL3L	1
modulem3	GO:0045943	positive regulation of transcription by RNA polymerase I	0.117519	HEATR1	1
modulem3	GO:0071359	cellular response to dsRNA	0.117519	RIOK3	1
modulem3	GO:0006611	protein export from nucleus	0.117519	SDAD1/NMD3	2
modulem3	GO:0001783	B cell apoptotic process	0.121878	NOC2L	1
modulem3	GO:0008334	histone mRNA metabolic process	0.124697	EXOSC10	1
modulem3	GO:0034661	ncRNA catabolic process	0.124697	EXOSC10	1
modulem3	GO:0050687	negative regulation of defense response to virus	0.124697	RIOK3	1
modulem3	GO:0051052	regulation of DNA metabolic process	0.127553	EXOSC10/GNL3/GNL3L	3
modulem4	GO:0140014	mitotic nuclear division	3.86589e-25	PLK1/SMC1A/RAD21/KNTC1/TTK/TPX2/SMC2/NCAPD2/KIF2C/NCAPH/PRC1/NDC80/KIF11/KIF4A/CDCA8/DLGAP5/FBXO5/CENPF/MKI67/NEK2/KIF20B/KIF14/AURKA/ANLN	24
modulem4	GO:0007059	chromosome segregation	7.41971e-24	PLK1/SMC1A/RAD21/TTK/SMC2/NCAPD2/KIF2C/NCAPH/PRC1/NUF2/NDC80/KIF4A/CDCA8/DLGAP5/HJURP/ECT2/FBXO5/CENPF/CDCA2/MKI67/NEK2/KIF14/FAM83D/BUB1	24
modulem4	GO:0000280	nuclear division	9.24423e-23	PLK1/SMC1A/RAD21/KNTC1/TTK/TPX2/SMC2/NCAPD2/KIF2C/NCAPH/PRC1/NDC80/KIF11/KIF4A/CDCA8/DLGAP5/FBXO5/CENPF/MKI67/NEK2/KIF20B/KIF14/ASPM/AURKA/ANLN	25
modulem4	GO:0048285	organelle fission	8.63163e-22	PLK1/SMC1A/RAD21/KNTC1/TTK/TPX2/SMC2/NCAPD2/KIF2C/NCAPH/PRC1/NDC80/KIF11/KIF4A/CDCA8/DLGAP5/FBXO5/CENPF/MKI67/NEK2/KIF20B/KIF14/ASPM/AURKA/ANLN	25
modulem4	GO:0006260	DNA replication	1.06108e-21	RFC3/RFC4/SMC1A/RRM1/DTL/MCM3/MCM5/MCM2/MCM7/MCM6/MCM8/CDK1/CCNA2/CDC45/FBXO5/WRN/POLD3/NBN/TOPBP1/ORC2/CLSPN/ATR	22
modulem4	GO:0098813	nuclear chromosome segregation	3.22177e-20	PLK1/SMC1A/RAD21/TTK/SMC2/NCAPD2/KIF2C/NCAPH/PRC1/NDC80/KIF4A/CDCA8/DLGAP5/ECT2/FBXO5/CENPF/NEK2/KIF14/FAM83D/BUB1	20
modulem4	GO:0000819	sister chromatid segregation	6.43478e-20	PLK1/SMC1A/RAD21/TTK/SMC2/NCAPD2/KIF2C/NCAPH/PRC1/NDC80/KIF4A/CDCA8/DLGAP5/FBXO5/CENPF/NEK2/KIF14/BUB1	18
modulem4	GO:0000070	mitotic sister chromatid segregation	1.1609e-19	PLK1/SMC1A/RAD21/TTK/SMC2/NCAPD2/KIF2C/NCAPH/PRC1/NDC80/KIF4A/CDCA8/DLGAP5/FBXO5/CENPF/NEK2/KIF14	17
modulem4	GO:0007088	regulation of mitotic nuclear division	1.6325e-15	PLK1/SMC1A/RAD21/KNTC1/TTK/NDC80/KIF11/DLGAP5/FBXO5/CENPF/MKI67/NEK2/KIF20B/AURKA/ANLN	15
modulem4	GO:0051783	regulation of nuclear division	1.18258e-14	PLK1/SMC1A/RAD21/KNTC1/TTK/NDC80/KIF11/DLGAP5/FBXO5/CENPF/MKI67/NEK2/KIF20B/AURKA/ANLN	15
modulem4	GO:0051983	regulation of chromosome segregation	1.29364e-13	PLK1/RAD21/TTK/KIF2C/NDC80/DLGAP5/ECT2/FBXO5/CENPF/MKI67/NEK2/BUB1	12
modulem4	GO:0006261	DNA-dependent DNA replication	2.14042e-13	RFC3/RFC4/SMC1A/MCM3/MCM5/MCM2/MCM7/MCM6/FBXO5/WRN/POLD3/NBN/ORC2	13
modulem4	GO:1901987	regulation of cell cycle phase transition	5.68362e-13	PLK1/RAD21/KNTC1/TTK/TPX2/DTL/CDK1/NDC80/DLGAP5/FBXO5/CENPF/HMMR/NEK2/KIF14/FAM83D/AURKA/ANLN/NBN/CLSPN	19
modulem4	GO:0071103	DNA conformation change	5.68362e-13	SMC2/MCM2/MCM7/MCM6/CDK1/NCAPD2/NCAPH/CDC45/CENPA/HJURP/WRN/RECQL/POT1/XRCC6/NBN/HAT1	16
modulem4	GO:0007051	spindle organization	8.66881e-13	PLK1/SMC1A/TTK/TPX2/STIL/PRC1/NDC80/KIF11/KIF4A/FBXO5/NEK2/ASPM/AURKA	13
modulem4	GO:0000086	G2/M transition of mitotic cell cycle	9.54768e-13	PLK1/RAD21/TPX2/DTL/CDK1/CCNA2/MELK/FBXO5/CENPF/HMMR/NEK2/KIF14/AURKA/NBN/CLSPN	15
modulem4	GO:0000075	cell cycle checkpoint	1.42155e-12	ZWILCH/PLK1/KNTC1/TTK/DTL/CDK1/NDC80/CDC45/CENPF/BUB1/AURKA/NBN/CLSPN/ATR	14
modulem4	GO:1901990	regulation of mitotic cell cycle phase transition	1.57922e-12	PLK1/RAD21/KNTC1/TTK/TPX2/DTL/CDK1/NDC80/DLGAP5/FBXO5/CENPF/HMMR/NEK2/KIF14/AURKA/ANLN/NBN/CLSPN	18
modulem4	GO:0044839	cell cycle G2/M phase transition	2.49318e-12	PLK1/RAD21/TPX2/DTL/CDK1/CCNA2/MELK/FBXO5/CENPF/HMMR/NEK2/KIF14/AURKA/NBN/CLSPN	15
modulem4	GO:0044843	cell cycle G1/S phase transition	1.23465e-11	MCM3/MCM5/MCM2/MCM7/MCM6/MCM8/CDKN3/CDK1/CCNA2/CDC45/FBXO5/KIF14/FAM83D/AURKA/ORC2	15
modulem4	GO:0010389	regulation of G2/M transition of mitotic cell cycle	1.23465e-11	PLK1/RAD21/TPX2/DTL/CDK1/FBXO5/CENPF/HMMR/NEK2/KIF14/AURKA/NBN/CLSPN	13
modulem4	GO:0034502	protein localization to chromosome	3.18187e-11	PLK1/RAD21/TTK/MCM8/CDK1/NDC80/CENPA/SPIDR/POT1/ATR	10
modulem4	GO:1902749	regulation of cell cycle G2/M phase transition	3.49028e-11	PLK1/RAD21/TPX2/DTL/CDK1/FBXO5/CENPF/HMMR/NEK2/KIF14/AURKA/NBN/CLSPN	13
modulem4	GO:0000226	microtubule cytoskeleton organization	5.57035e-11	PLK1/SMC1A/TTK/TPX2/STIL/CDK1/KIF2C/PRC1/NDC80/KIF11/KIF4A/CENPA/FBXO5/NEK2/CKAP2/ASPM/AURKA	17
modulem4	GO:0007093	mitotic cell cycle checkpoint	4.22209e-10	ZWILCH/PLK1/KNTC1/TTK/CDK1/NDC80/CENPF/BUB1/AURKA/NBN/CLSPN	11
modulem4	GO:0033044	regulation of chromosome organization	4.75583e-10	PLK1/RAD21/TTK/MCM2/NDC80/DLGAP5/FBXO5/CENPF/MKI67/NEK2/BUB1/POT1/NBN/ATR	14
modulem4	GO:0051321	meiotic cell cycle	6.7073e-10	PLK1/SMC1A/RAD21/TTK/SMC2/NCAPH/FBXO5/NEK2/ASPM/AURKA/NBN/MSH6	12
modulem4	GO:0006270	DNA replication initiation	6.96727e-10	MCM3/MCM5/MCM2/MCM7/MCM6/NBN/ORC2	7
modulem4	GO:1902850	microtubule cytoskeleton organization involved in mitosis	8.30955e-10	PLK1/SMC1A/TTK/TPX2/STIL/PRC1/NDC80/KIF11/KIF4A/CENPA	10
modulem4	GO:0000082	G1/S transition of mitotic cell cycle	1.00618e-09	MCM3/MCM5/MCM2/MCM7/MCM6/MCM8/CDKN3/CDK1/CDC45/FBXO5/KIF14/AURKA/ORC2	13
modulem4	GO:0032392	DNA geometric change	1.42467e-09	MCM2/MCM7/MCM6/CDC45/WRN/RECQL/POT1/XRCC6/NBN	9
modulem4	GO:0051225	spindle assembly	2.09416e-09	PLK1/SMC1A/TPX2/KIF11/KIF4A/FBXO5/NEK2/ASPM/AURKA	9
modulem4	GO:0007052	mitotic spindle organization	3.32775e-09	PLK1/SMC1A/TTK/TPX2/STIL/PRC1/NDC80/KIF11/KIF4A	9
modulem4	GO:0045930	negative regulation of mitotic cell cycle	4.77915e-09	ZWILCH/PLK1/RAD21/KNTC1/TTK/CDK1/NDC80/FBXO5/CENPF/BUB1/AURKA/NBN/CLSPN	13
modulem4	GO:0051304	chromosome separation	6.2636e-09	PLK1/RAD21/TTK/NCAPH/NDC80/DLGAP5/FBXO5/CENPF	8
modulem4	GO:0033045	regulation of sister chromatid segregation	7.72999e-09	PLK1/RAD21/TTK/NDC80/DLGAP5/FBXO5/CENPF/BUB1	8
modulem4	GO:0030071	regulation of mitotic metaphase/anaphase transition	9.51187e-09	PLK1/RAD21/TTK/NDC80/DLGAP5/FBXO5/CENPF	7
modulem4	GO:1902099	regulation of metaphase/anaphase transition of cell cycle	1.28579e-08	PLK1/RAD21/TTK/NDC80/DLGAP5/FBXO5/CENPF	7
modulem4	GO:0032508	DNA duplex unwinding	1.39602e-08	MCM2/MCM7/MCM6/CDC45/WRN/POT1/XRCC6/NBN	8
modulem4	GO:0007091	metaphase/anaphase transition of mitotic cell cycle	1.39602e-08	PLK1/RAD21/TTK/NDC80/DLGAP5/FBXO5/CENPF	7
modulem4	GO:0010965	regulation of mitotic sister chromatid separation	1.39602e-08	PLK1/RAD21/TTK/NDC80/DLGAP5/FBXO5/CENPF	7
modulem4	GO:0010948	negative regulation of cell cycle process	1.50484e-08	PLK1/SMC1A/RAD21/TTK/DTL/CDK1/NDC80/FBXO5/CENPF/NEK2/AURKA/NBN/CLSPN	13
modulem4	GO:0044784	metaphase/anaphase transition of cell cycle	1.766e-08	PLK1/RAD21/TTK/NDC80/DLGAP5/FBXO5/CENPF	7
modulem4	GO:0051306	mitotic sister chromatid separation	1.766e-08	PLK1/RAD21/TTK/NDC80/DLGAP5/FBXO5/CENPF	7
modulem4	GO:1905818	regulation of chromosome separation	2.66494e-08	PLK1/RAD21/TTK/NDC80/DLGAP5/FBXO5/CENPF	7
modulem4	GO:2001251	negative regulation of chromosome organization	2.83697e-08	PLK1/RAD21/TTK/MCM2/NDC80/FBXO5/CENPF/POT1/NBN	9
modulem4	GO:0033047	regulation of mitotic sister chromatid segregation	4.96643e-08	PLK1/RAD21/TTK/NDC80/DLGAP5/FBXO5/CENPF	7
modulem4	GO:0045841	negative regulation of mitotic metaphase/anaphase transition	4.9935e-08	PLK1/RAD21/TTK/NDC80/FBXO5/CENPF	6
modulem4	GO:2000816	negative regulation of mitotic sister chromatid separation	4.9935e-08	PLK1/RAD21/TTK/NDC80/FBXO5/CENPF	6
modulem4	GO:1902100	negative regulation of metaphase/anaphase transition of cell cycle	5.84615e-08	PLK1/RAD21/TTK/NDC80/FBXO5/CENPF	6
modulem4	GO:1905819	negative regulation of chromosome separation	5.84615e-08	PLK1/RAD21/TTK/NDC80/FBXO5/CENPF	6
modulem4	GO:1901988	negative regulation of cell cycle phase transition	7.11691e-08	PLK1/RAD21/TTK/DTL/CDK1/NDC80/FBXO5/CENPF/AURKA/NBN/CLSPN	11
modulem4	GO:0051052	regulation of DNA metabolic process	8.04295e-08	RFC3/RFC4/SMC1A/CDK1/CCNA2/FBXO5/NEK2/SPIDR/WRN/POT1/NBN/MSH6/ATR	13
modulem4	GO:0033048	negative regulation of mitotic sister chromatid segregation	8.04295e-08	PLK1/RAD21/TTK/NDC80/FBXO5/CENPF	6
modulem4	GO:0000910	cytokinesis	9.98915e-08	PLK1/PRC1/KIF4A/CENPA/ECT2/KIF20B/KIF14/CKAP2/ANLN	9
modulem4	GO:0006275	regulation of DNA replication	1.04748e-07	RFC3/RFC4/SMC1A/CDK1/CCNA2/FBXO5/NBN/ATR	8
modulem4	GO:0033046	negative regulation of sister chromatid segregation	1.08476e-07	PLK1/RAD21/TTK/NDC80/FBXO5/CENPF	6
modulem4	GO:1903046	meiotic cell cycle process	1.19969e-07	PLK1/RAD21/TTK/SMC2/NCAPH/FBXO5/ASPM/AURKA/MSH6	9
modulem4	GO:0051985	negative regulation of chromosome segregation	1.24073e-07	PLK1/RAD21/TTK/NDC80/FBXO5/CENPF	6
modulem4	GO:0000723	telomere maintenance	1.37844e-07	RFC3/RFC4/NEK2/WRN/POLD3/POT1/XRCC6/NBN/ATR	9
modulem4	GO:0000281	mitotic cytokinesis	1.50571e-07	PLK1/KIF4A/CENPA/ECT2/KIF20B/CKAP2/ANLN	7
modulem4	GO:0090068	positive regulation of cell cycle process	1.8388e-07	RAD21/DTL/CDK1/NDC80/DLGAP5/ECT2/FBXO5/KIF20B/KIF14/FAM83D/AURKA	11
modulem4	GO:0050000	chromosome localization	1.94174e-07	KIF2C/NDC80/CDCA8/DLGAP5/CENPF/KIF14/FAM83D	7
modulem4	GO:0051303	establishment of chromosome localization	1.94174e-07	KIF2C/NDC80/CDCA8/DLGAP5/CENPF/KIF14/FAM83D	7
modulem4	GO:0032200	telomere organization	2.58511e-07	RFC3/RFC4/NEK2/WRN/POLD3/POT1/XRCC6/NBN/ATR	9
modulem4	GO:0045839	negative regulation of mitotic nuclear division	3.20397e-07	PLK1/RAD21/TTK/NDC80/FBXO5/CENPF	6
modulem4	GO:1901991	negative regulation of mitotic cell cycle phase transition	3.59136e-07	PLK1/RAD21/TTK/CDK1/NDC80/FBXO5/CENPF/AURKA/NBN/CLSPN	10
modulem4	GO:0061640	cytoskeleton-dependent cytokinesis	4.57545e-07	PLK1/KIF4A/CENPA/ECT2/KIF20B/CKAP2/ANLN	7
modulem4	GO:0051784	negative regulation of nuclear division	7.49997e-07	PLK1/RAD21/TTK/NDC80/FBXO5/CENPF	6
modulem4	GO:0071897	DNA biosynthetic process	8.03984e-07	RFC3/RFC4/DTL/CENPF/NEK2/WRN/POLD3/POT1/ATR	9
modulem4	GO:0051310	metaphase plate congression	1.02853e-06	KIF2C/NDC80/CDCA8/CENPF/KIF14/FAM83D	6
modulem4	GO:0031570	DNA integrity checkpoint	1.04462e-06	PLK1/DTL/CDK1/CDC45/AURKA/NBN/CLSPN/ATR	8
modulem4	GO:0140013	meiotic nuclear division	1.08851e-06	PLK1/RAD21/TTK/SMC2/NCAPH/FBXO5/ASPM/AURKA	8
modulem4	GO:1902750	negative regulation of cell cycle G2/M phase transition	1.35749e-06	PLK1/RAD21/DTL/CDK1/AURKA/NBN/CLSPN	7
modulem4	GO:0010639	negative regulation of organelle organization	1.40384e-06	PLK1/RAD21/TTK/MCM2/NDC80/FBXO5/CENPF/NEK2/CKAP2/POT1/NBN	11
modulem4	GO:0007143	female meiotic nuclear division	1.40384e-06	PLK1/TTK/NCAPH/FBXO5/AURKA	5
modulem4	GO:0031572	G2 DNA damage checkpoint	1.40384e-06	PLK1/DTL/CDK1/NBN/CLSPN	5
modulem4	GO:0045787	positive regulation of cell cycle	2.44044e-06	RAD21/DTL/CDK1/NDC80/DLGAP5/ECT2/FBXO5/KIF20B/KIF14/FAM83D/AURKA	11
modulem4	GO:0051054	positive regulation of DNA metabolic process	2.46605e-06	RFC3/RFC4/CDK1/NEK2/SPIDR/WRN/POT1/NBN/ATR	9
modulem4	GO:0070507	regulation of microtubule cytoskeleton organization	3.98098e-06	PLK1/SMC1A/TPX2/STIL/KIF11/NEK2/CKAP2/AURKA	8
modulem4	GO:0022616	DNA strand elongation	4.88586e-06	RFC3/RFC4/POT1/NBN	4
modulem4	GO:1901796	regulation of signal transduction by p53 class mediator	5.75874e-06	RFC3/RFC4/TPX2/AURKA/WRN/NBN/TOPBP1/ATR	8
modulem4	GO:0007292	female gamete generation	9.97131e-06	PLK1/TTK/MCM8/NCAPH/FBXO5/ASPM/AURKA	7
modulem4	GO:0072331	signal transduction by p53 class mediator	9.97131e-06	RFC3/RFC4/TPX2/CDK1/AURKA/WRN/NBN/TOPBP1/ATR	9
modulem4	GO:0006323	DNA packaging	1.01407e-05	SMC2/MCM2/CDK1/NCAPD2/NCAPH/CENPA/HJURP/HAT1	8
modulem4	GO:0000077	DNA damage checkpoint	1.01407e-05	PLK1/DTL/CDK1/AURKA/NBN/CLSPN/ATR	7
modulem4	GO:0051383	kinetochore organization	1.19697e-05	SMC2/NDC80/CENPA/CENPF	4
modulem4	GO:0032886	regulation of microtubule-based process	1.19752e-05	PLK1/SMC1A/TPX2/STIL/KIF11/NEK2/CKAP2/AURKA	8
modulem4	GO:0072698	protein localization to microtubule cytoskeleton	1.2428e-05	TTK/STIL/KIF20B/FAM83D/AURKA	5
modulem4	GO:0016321	female meiosis chromosome segregation	1.33179e-05	PLK1/TTK/NCAPH	3
modulem4	GO:0090306	spindle assembly involved in meiosis	1.33179e-05	FBXO5/ASPM/AURKA	3
modulem4	GO:0090329	regulation of DNA-dependent DNA replication	1.33808e-05	RFC3/RFC4/SMC1A/FBXO5/NBN	5
modulem4	GO:0071459	protein localization to chromosome, centromeric region	1.3792e-05	TTK/CDK1/NDC80/CENPA	4
modulem4	GO:0010212	response to ionizing radiation	1.5773e-05	RRM1/ECT2/SPIDR/WRN/XRCC6/TOPBP1/ATR	7
modulem4	GO:0000731	DNA synthesis involved in DNA repair	1.5773e-05	RFC3/RFC4/DTL/WRN/POLD3	5
modulem4	GO:0044380	protein localization to cytoskeleton	1.5773e-05	TTK/STIL/KIF20B/FAM83D/AURKA	5
modulem4	GO:0090307	mitotic spindle assembly	1.90347e-05	PLK1/SMC1A/TPX2/KIF11/KIF4A	5
modulem4	GO:0045931	positive regulation of mitotic cell cycle	2.38232e-05	DTL/CDK1/NDC80/DLGAP5/FBXO5/KIF20B/AURKA	7
modulem4	GO:0044786	cell cycle DNA replication	2.96027e-05	RFC3/RFC4/SMC1A/FBXO5/POLD3	5
modulem4	GO:0006268	DNA unwinding involved in DNA replication	3.37469e-05	MCM2/MCM7/MCM6	3
modulem4	GO:0006310	DNA recombination	4.77393e-05	RAD21/MCM8/SPIDR/WRN/PALB2/XRCC6/NBN/MSH6	8
modulem4	GO:0008608	attachment of spindle microtubules to kinetochore	4.87575e-05	KIF2C/NDC80/ECT2/NEK2	4
modulem4	GO:0007098	centrosome cycle	4.92672e-05	PLK1/STIL/CDK1/KIF11/NEK2/AURKA	6
modulem4	GO:0007094	mitotic spindle assembly checkpoint	5.34743e-05	PLK1/TTK/NDC80/CENPF	4
modulem4	GO:0031577	spindle checkpoint	5.34743e-05	PLK1/TTK/NDC80/CENPF	4
modulem4	GO:0071173	spindle assembly checkpoint	5.34743e-05	PLK1/TTK/NDC80/CENPF	4
modulem4	GO:0071174	mitotic spindle checkpoint	5.34743e-05	PLK1/TTK/NDC80/CENPF	4
modulem4	GO:2000573	positive regulation of DNA biosynthetic process	5.63878e-05	RFC3/RFC4/NEK2/POT1/ATR	5
modulem4	GO:0009314	response to radiation	6.23066e-05	SMC1A/RRM1/DTL/ECT2/SPIDR/WRN/XRCC6/TOPBP1/MSH6/ATR	10
modulem4	GO:0030261	chromosome condensation	6.78587e-05	SMC2/CDK1/NCAPD2/NCAPH	4
modulem4	GO:0071479	cellular response to ionizing radiation	6.83802e-05	ECT2/SPIDR/WRN/XRCC6/ATR	5
modulem4	GO:0031023	microtubule organizing center organization	7.42778e-05	PLK1/STIL/CDK1/KIF11/NEK2/AURKA	6
modulem4	GO:0007100	mitotic centrosome separation	8.72666e-05	KIF11/NEK2/AURKA	3
modulem4	GO:0042770	signal transduction in response to DNA damage	0.000109809	PLK1/DTL/CDK1/AURKA/NBN/ATR	6
modulem4	GO:0000212	meiotic spindle organization	0.000112067	FBXO5/ASPM/AURKA	3
modulem4	GO:0051095	regulation of helicase activity	0.000112067	MCM2/POT1/MSH6	3
modulem4	GO:0051299	centrosome separation	0.000112067	KIF11/NEK2/AURKA	3
modulem4	GO:0042769	DNA damage response, detection of DNA damage	0.000127609	RFC3/RFC4/DTL/POLD3	4
modulem4	GO:0007057	spindle assembly involved in female meiosis I	0.000137262	FBXO5/AURKA	2
modulem4	GO:0031145	anaphase-promoting complex-dependent catabolic process	0.000139145	PLK1/PTTG1/CDK1/FBXO5/AURKA	5
modulem4	GO:0019985	translesion synthesis	0.000153184	RFC3/RFC4/DTL/POLD3	4
modulem4	GO:0032465	regulation of cytokinesis	0.000154175	PLK1/PRC1/ECT2/KIF20B/KIF14	5
modulem4	GO:0051053	negative regulation of DNA metabolic process	0.000154833	SMC1A/FBXO5/POT1/NBN/MSH6/ATR	6
modulem4	GO:0007080	mitotic metaphase plate congression	0.000163837	KIF2C/NDC80/CDCA8/KIF14	4
modulem4	GO:0051653	spindle localization	0.000163837	PLK1/NDC80/CENPA/ASPM	4
modulem4	GO:0010972	negative regulation of G2/M transition of mitotic cell cycle	0.000167649	RAD21/CDK1/AURKA/NBN/CLSPN	5
modulem4	GO:0007076	mitotic chromosome condensation	0.000211762	SMC2/NCAPD2/NCAPH	3
modulem4	GO:0061982	meiosis I cell cycle process	0.000229835	PLK1/RAD21/FBXO5/AURKA/MSH6	5
modulem4	GO:0060249	anatomical structure homeostasis	0.000243637	RFC3/RFC4/NEK2/WRN/POLD3/POT1/XRCC6/NBN/ATR	9
modulem4	GO:0034501	protein localization to kinetochore	0.000253914	TTK/CDK1/NDC80	3
modulem4	GO:0006301	postreplication repair	0.000270599	RFC3/RFC4/DTL/POLD3	4
modulem4	GO:1901989	positive regulation of cell cycle phase transition	0.000303396	DTL/CDK1/DLGAP5/FBXO5/FAM83D	5
modulem4	GO:0051302	regulation of cell division	0.000313587	PLK1/PRC1/ECT2/KIF20B/KIF14/ASPM	6
modulem4	GO:0007062	sister chromatid cohesion	0.000338611	PLK1/SMC1A/RAD21/BUB1	4
modulem4	GO:0007056	spindle assembly involved in female meiosis	0.000355746	FBXO5/AURKA	2
modulem4	GO:0010032	meiotic chromosome condensation	0.000355746	SMC2/NCAPH	2
modulem4	GO:0032954	regulation of cytokinetic process	0.000355746	ECT2/KIF20B	2
modulem4	GO:0032206	positive regulation of telomere maintenance	0.000355746	NEK2/POT1/NBN/ATR	4
modulem4	GO:2001252	positive regulation of chromosome organization	0.000380166	RAD21/DLGAP5/NEK2/POT1/NBN/ATR	6
modulem4	GO:0007095	mitotic G2 DNA damage checkpoint	0.000404612	CDK1/NBN/CLSPN	3
modulem4	GO:0051656	establishment of organelle localization	0.0004196	PLK1/KIF2C/NDC80/CDCA8/CENPA/DLGAP5/CENPF/KIF14/FAM83D	9
modulem4	GO:2000278	regulation of DNA biosynthetic process	0.0004307	RFC3/RFC4/NEK2/POT1/ATR	5
modulem4	GO:0046605	regulation of centrosome cycle	0.0004307	STIL/KIF11/NEK2/AURKA	4
modulem4	GO:0051493	regulation of cytoskeleton organization	0.000613418	PLK1/SMC1A/TPX2/STIL/KIF11/ECT2/NEK2/CKAP2/AURKA	9
modulem4	GO:1905774	regulation of DNA helicase activity	0.000672533	MCM2/POT1	2
modulem4	GO:0006297	nucleotide-excision repair, DNA gap filling	0.000696543	RFC3/RFC4/POLD3	3
modulem4	GO:0044818	mitotic G2/M transition checkpoint	0.000696543	CDK1/NBN/CLSPN	3
modulem4	GO:0000132	establishment of mitotic spindle orientation	0.000783199	PLK1/NDC80/CENPA	3
modulem4	GO:0010971	positive regulation of G2/M transition of mitotic cell cycle	0.000783199	DTL/CDK1/FBXO5	3
modulem4	GO:0045132	meiotic chromosome segregation	0.000958391	PLK1/TTK/SMC2/NCAPH	4
modulem4	GO:1905462	regulation of DNA duplex unwinding	0.00107367	MCM2/POT1	2
modulem4	GO:0032201	telomere maintenance via semi-conservative replication	0.00109317	RFC3/RFC4/POLD3	3
modulem4	GO:1902751	positive regulation of cell cycle G2/M phase transition	0.00109317	DTL/CDK1/FBXO5	3
modulem4	GO:0046777	protein autophosphorylation	0.00113644	TTK/MELK/NEK2/AURKA/NBN/ATR	6
modulem4	GO:0006302	double-strand break repair	0.00115867	MCM8/SPIDR/WRN/PALB2/XRCC6/NBN	6
modulem4	GO:0040001	establishment of mitotic spindle localization	0.00118234	PLK1/NDC80/CENPA	3
modulem4	GO:0051294	establishment of spindle orientation	0.00118234	PLK1/NDC80/CENPA	3
modulem4	GO:0071168	protein localization to chromatin	0.00118234	PLK1/RAD21/MCM8	3
modulem4	GO:0072401	signal transduction involved in DNA integrity checkpoint	0.00125394	PLK1/DTL/CDK1/AURKA	4
modulem4	GO:0072422	signal transduction involved in DNA damage checkpoint	0.00125394	PLK1/DTL/CDK1/AURKA	4
modulem4	GO:0071480	cellular response to gamma radiation	0.00129063	WRN/XRCC6/ATR	3
modulem4	GO:0072395	signal transduction involved in cell cycle checkpoint	0.00130544	PLK1/DTL/CDK1/AURKA	4
modulem4	GO:0032876	negative regulation of DNA endoreduplication	0.00147018	SMC1A/FBXO5	2
modulem4	GO:1900262	regulation of DNA-directed DNA polymerase activity	0.00147018	RFC3/RFC4	2
modulem4	GO:1900264	positive regulation of DNA-directed DNA polymerase activity	0.00147018	RFC3/RFC4	2
modulem4	GO:0032204	regulation of telomere maintenance	0.00163971	NEK2/POT1/NBN/ATR	4
modulem4	GO:0018105	peptidyl-serine phosphorylation	0.00175447	PLK1/TTK/CDK1/AURKA/CLSPN/ATR	6
modulem4	GO:1901992	positive regulation of mitotic cell cycle phase transition	0.00186978	DTL/CDK1/DLGAP5/FBXO5	4
modulem4	GO:0032212	positive regulation of telomere maintenance via telomerase	0.00198108	NEK2/POT1/ATR	3
modulem4	GO:0007144	female meiosis I	0.00198108	FBXO5/AURKA	2
modulem4	GO:0051096	positive regulation of helicase activity	0.00198108	POT1/MSH6	2
modulem4	GO:0044773	mitotic DNA damage checkpoint	0.00219185	CDK1/AURKA/NBN/CLSPN	4
modulem4	GO:0008156	negative regulation of DNA replication	0.0022889	SMC1A/FBXO5/ATR	3
modulem4	GO:0051293	establishment of spindle localization	0.0022889	PLK1/NDC80/CENPA	3
modulem4	GO:0007127	meiosis I	0.00235199	PLK1/RAD21/FBXO5/AURKA	4
modulem4	GO:0006296	nucleotide-excision repair, DNA incision, 5'-to lesion	0.00241463	RFC3/RFC4/POLD3	3
modulem4	GO:0032467	positive regulation of cytokinesis	0.00241463	ECT2/KIF20B/KIF14	3
modulem4	GO:0060236	regulation of mitotic spindle organization	0.00241463	PLK1/SMC1A/TPX2	3
modulem4	GO:1904358	positive regulation of telomere maintenance via telomere lengthening	0.00241463	NEK2/POT1/ATR	3
modulem4	GO:0044774	mitotic DNA integrity checkpoint	0.00248929	CDK1/AURKA/NBN/CLSPN	4
modulem4	GO:0046602	regulation of mitotic centrosome separation	0.00248929	KIF11/NEK2	2
modulem4	GO:0018209	peptidyl-serine modification	0.00255724	PLK1/TTK/CDK1/AURKA/CLSPN/ATR	6
modulem4	GO:0016572	histone phosphorylation	0.00255724	CDK1/CCNA2/AURKA	3
modulem4	GO:0033683	nucleotide-excision repair, DNA incision	0.00274771	RFC3/RFC4/POLD3	3
modulem4	GO:0000022	mitotic spindle elongation	0.00307368	PRC1/KIF4A	2
modulem4	GO:0006271	DNA strand elongation involved in DNA replication	0.00307368	RFC3/RFC4	2
modulem4	GO:0032875	regulation of DNA endoreduplication	0.00307368	SMC1A/FBXO5	2
modulem4	GO:0061820	telomeric D-loop disassembly	0.00307368	WRN/POT1	2
modulem4	GO:0090224	regulation of spindle organization	0.00309742	PLK1/SMC1A/TPX2	3
modulem4	GO:0007163	establishment or maintenance of cell polarity	0.00309742	PLK1/KIF2C/NDC80/CENPA/KIF20B	5
modulem4	GO:0071478	cellular response to radiation	0.00316353	ECT2/SPIDR/WRN/XRCC6/ATR	5
modulem4	GO:0042023	DNA endoreduplication	0.00371401	SMC1A/FBXO5	2
modulem4	GO:0051231	spindle elongation	0.00371401	PRC1/KIF4A	2
modulem4	GO:0051315	attachment of mitotic spindle microtubules to kinetochore	0.00371401	KIF2C/NDC80	2
modulem4	GO:0030330	DNA damage response, signal transduction by p53 class mediator	0.00426896	CDK1/AURKA/NBN/ATR	4
modulem4	GO:0033260	nuclear DNA replication	0.00443657	RFC3/RFC4/POLD3	3
modulem4	GO:0000076	DNA replication checkpoint	0.00443657	CDC45/CLSPN	2
modulem4	GO:0090657	telomeric loop disassembly	0.00443657	WRN/POT1	2
modulem4	GO:0000724	double-strand break repair via homologous recombination	0.00448679	MCM8/SPIDR/PALB2/NBN	4
modulem4	GO:0000725	recombinational repair	0.00462108	MCM8/SPIDR/PALB2/NBN	4
modulem4	GO:0007077	mitotic nuclear envelope disassembly	0.00520548	PLK1/CDK1	2
modulem4	GO:0051988	regulation of attachment of spindle microtubules to kinetochore	0.00520548	ECT2/NEK2	2
modulem4	GO:0007569	cell aging	0.00574267	CDK1/FBXO5/WRN/ATR	4
modulem4	GO:0006336	DNA replication-independent nucleosome assembly	0.00602411	CENPA/HJURP/HAT1	3
modulem4	GO:0016233	telomere capping	0.00602411	NEK2/POT1/NBN	3
modulem4	GO:0032210	regulation of telomere maintenance via telomerase	0.00602411	NEK2/POT1/ATR	3
modulem4	GO:0034724	DNA replication-independent nucleosome organization	0.00602411	CENPA/HJURP/HAT1	3
modulem4	GO:0034508	centromere complex assembly	0.00633039	CENPA/HJURP/CENPF	3
modulem4	GO:0010332	response to gamma radiation	0.00664528	WRN/XRCC6/ATR	3
modulem4	GO:0065004	protein-DNA complex assembly	0.00680473	MCM2/CENPA/HJURP/CENPF/HAT1	5
modulem4	GO:0051307	meiotic chromosome separation	0.00680473	TTK/NCAPH	2
modulem4	GO:0072425	signal transduction involved in G2 DNA damage checkpoint	0.00680473	PLK1/DTL	2
modulem4	GO:0030010	establishment of cell polarity	0.00743343	PLK1/NDC80/CENPA/KIF20B	4
modulem4	GO:0001325	formation of extrachromosomal circular DNA	0.00768706	WRN/NBN	2
modulem4	GO:0090656	t-circle formation	0.00768706	WRN/NBN	2
modulem4	GO:0090737	telomere maintenance via telomere trimming	0.00768706	WRN/NBN	2
modulem4	GO:0022412	cellular process involved in reproduction in multicellular organism	0.00817484	PLK1/TTK/NCAPH/FBXO5/ASPM/AURKA	6
modulem4	GO:0043161	proteasome-mediated ubiquitin-dependent protein catabolic process	0.00839342	PLK1/PTTG1/CDK1/FBXO5/KIF14/AURKA	6
modulem4	GO:1904356	regulation of telomere maintenance via telomere lengthening	0.00848829	NEK2/POT1/ATR	3
modulem4	GO:0007096	regulation of exit from mitosis	0.00848829	KNTC1/ANLN	2
modulem4	GO:0030397	membrane disassembly	0.00848829	PLK1/CDK1	2
modulem4	GO:0051081	nuclear envelope disassembly	0.00848829	PLK1/CDK1	2
modulem4	GO:0051382	kinetochore assembly	0.00848829	CENPA/CENPF	2
modulem4	GO:0006334	nucleosome assembly	0.00910602	MCM2/CENPA/HJURP/HAT1	4
modulem4	GO:0009411	response to UV	0.00956598	DTL/WRN/MSH6/ATR	4
modulem4	GO:0007050	cell cycle arrest	0.00970186	CDKN3/CDK1/KIF20B/AURKA/NBN	5
modulem4	GO:0042276	error-prone translesion synthesis	0.0105791	RFC3/RFC4	2
modulem4	GO:0007004	telomere maintenance via telomerase	0.0107627	NEK2/POT1/ATR	3
modulem4	GO:0061351	neural precursor cell proliferation	0.0112567	RRM1/MELK/KIF14/ASPM	4
modulem4	GO:0071824	protein-DNA complex subunit organization	0.0112567	MCM2/CENPA/HJURP/CENPF/HAT1	5
modulem4	GO:0001832	blastocyst growth	0.0115402	PALB2/NBN	2
modulem4	GO:0070987	error-free translesion synthesis	0.0115402	RFC3/RFC4	2
modulem4	GO:1901673	regulation of mitotic spindle assembly	0.0127357	PLK1/SMC1A	2
modulem4	GO:0006283	transcription-coupled nucleotide-excision repair	0.0133931	RFC3/RFC4/POLD3	3
modulem4	GO:0031497	chromatin assembly	0.0136703	MCM2/CENPA/HJURP/HAT1	4
modulem4	GO:0006278	RNA-dependent DNA biosynthetic process	0.0136889	NEK2/POT1/ATR	3
modulem4	GO:1900182	positive regulation of protein localization to nucleus	0.0136889	PLK1/CDK1/ECT2	3
modulem4	GO:0007063	regulation of sister chromatid cohesion	0.0136889	RAD21/BUB1	2
modulem4	GO:2000104	negative regulation of DNA-dependent DNA replication	0.0136889	SMC1A/FBXO5	2
modulem4	GO:0031100	animal organ regeneration	0.0140996	CDK1/CCNA2/AURKA	3
modulem4	GO:0006890	retrograde vesicle-mediated transport, Golgi to ER	0.0145782	KIF2C/KIF11/KIF4A	3
modulem4	GO:1903429	regulation of cell maturation	0.0147731	KIF14/AURKA	2
modulem4	GO:1904666	regulation of ubiquitin protein ligase activity	0.0147731	PLK1/FBXO5	2
modulem4	GO:0010498	proteasomal protein catabolic process	0.015999	PLK1/PTTG1/CDK1/FBXO5/KIF14/AURKA	6
modulem4	GO:0010833	telomere maintenance via telomere lengthening	0.015999	NEK2/POT1/ATR	3
modulem4	GO:0034728	nucleosome organization	0.0161753	MCM2/CENPA/HJURP/HAT1	4
modulem4	GO:0051642	centrosome localization	0.0161753	ASPM/AURKA	2
modulem4	GO:0051984	positive regulation of chromosome segregation	0.0161753	RAD21/DLGAP5	2
modulem4	GO:0070199	establishment of protein localization to chromosome	0.0161753	SPIDR/POT1	2
modulem4	GO:0000710	meiotic mismatch repair	0.0161753	MSH6	1
modulem4	GO:0000741	karyogamy	0.0161753	CDK1	1
modulem4	GO:0000921	septin ring assembly	0.0161753	ANLN	1
modulem4	GO:0007344	pronuclear fusion	0.0161753	CDK1	1
modulem4	GO:0021685	cerebellar granular layer structural organization	0.0161753	KIF14	1
modulem4	GO:0031106	septin ring organization	0.0161753	ANLN	1
modulem4	GO:0033316	meiotic spindle assembly checkpoint	0.0161753	TTK	1
modulem4	GO:0044779	meiotic spindle checkpoint	0.0161753	TTK	1
modulem4	GO:0045769	negative regulation of asymmetric cell division	0.0161753	ASPM	1
modulem4	GO:0060383	positive regulation of DNA strand elongation	0.0161753	POT1	1
modulem4	GO:0060542	regulation of strand invasion	0.0161753	WRN	1
modulem4	GO:0098530	positive regulation of strand invasion	0.0161753	WRN	1
modulem4	GO:1902480	protein localization to mitotic spindle	0.0161753	FAM83D	1
modulem4	GO:1903096	protein localization to meiotic spindle midzone	0.0161753	TTK	1
modulem4	GO:1903126	negative regulation of centriole-centriole cohesion	0.0161753	NEK2	1
modulem4	GO:1905359	protein localization to meiotic spindle	0.0161753	TTK	1
modulem4	GO:2000431	regulation of cytokinesis, actomyosin contractile ring assembly	0.0161753	ECT2	1
modulem4	GO:0001556	oocyte maturation	0.0171912	FBXO5/AURKA	2
modulem4	GO:0061842	microtubule organizing center localization	0.0171912	ASPM/AURKA	2
modulem4	GO:0000018	regulation of DNA recombination	0.0171912	SPIDR/WRN/MSH6	3
modulem4	GO:0048477	oogenesis	0.0171912	FBXO5/ASPM/AURKA	3
modulem4	GO:0051781	positive regulation of cell division	0.0171912	ECT2/KIF20B/KIF14	3
modulem4	GO:1904353	regulation of telomere capping	0.0183852	NEK2/NBN	2
modulem4	GO:0006298	mismatch repair	0.0195908	POLD3/MSH6	2
modulem4	GO:0021846	cell proliferation in forebrain	0.0195908	RRM1/KIF14	2
modulem4	GO:0090169	regulation of spindle assembly	0.0195908	PLK1/SMC1A	2
modulem4	GO:0006333	chromatin assembly or disassembly	0.0199585	MCM2/CENPA/HJURP/HAT1	4
modulem4	GO:0010458	exit from mitosis	0.0208184	KNTC1/ANLN	2
modulem4	GO:0070198	protein localization to chromosome, telomeric region	0.0208184	POT1/ATR	2
modulem4	GO:0000083	regulation of transcription involved in G1/S transition of mitotic cell cycle	0.0222252	CDC45/FBXO5	2
modulem4	GO:0031109	microtubule polymerization or depolymerization	0.0227759	KIF2C/FBXO5/CKAP2	3
modulem4	GO:0097711	ciliary basal body-plasma membrane docking	0.023371	PLK1/CDK1/NEK2	3
modulem4	GO:0071539	protein localization to centrosome	0.0235011	STIL/AURKA	2
modulem4	GO:0019886	antigen processing and presentation of exogenous peptide antigen via MHC class II	0.024502	KIF2C/KIF11/KIF4A	3
modulem4	GO:0032147	activation of protein kinase activity	0.024502	TPX2/CDK1/ECT2/KIF14/CLSPN	5
modulem4	GO:1905508	protein localization to microtubule organizing center	0.0247959	STIL/AURKA	2
modulem4	GO:0001824	blastocyst development	0.025738	NEK2/PALB2/NBN	3
modulem4	GO:0002495	antigen processing and presentation of peptide antigen via MHC class II	0.0263183	KIF2C/KIF11/KIF4A	3
modulem4	GO:1902806	regulation of cell cycle G1/S phase transition	0.0263183	CDK1/KIF14/FAM83D/AURKA	4
modulem4	GO:0071214	cellular response to abiotic stimulus	0.0263699	ECT2/SPIDR/WRN/XRCC6/ATR	5
modulem4	GO:0104004	cellular response to environmental stimulus	0.0263699	ECT2/SPIDR/WRN/XRCC6/ATR	5
modulem4	GO:0002504	antigen processing and presentation of peptide or polysaccharide antigen via MHC class II	0.0266387	KIF2C/KIF11/KIF4A	3
modulem4	GO:0018107	peptidyl-threonine phosphorylation	0.0266387	PLK1/TTK/CDK1	3
modulem4	GO:0006289	nucleotide-excision repair	0.0269245	RFC3/RFC4/POLD3	3
modulem4	GO:0007019	microtubule depolymerization	0.0269245	KIF2C/CKAP2	2
modulem4	GO:0010259	multicellular organism aging	0.0269245	WRN/MSH6	2
modulem4	GO:0007568	aging	0.0269245	CDK1/FBXO5/WRN/MSH6/ATR	5
modulem4	GO:1903829	positive regulation of cellular protein localization	0.0269245	PLK1/CDK1/NDC80/ECT2/KIF20B	5
modulem4	GO:0021693	cerebellar Purkinje cell layer structural organization	0.0269245	KIF14	1
modulem4	GO:0021698	cerebellar cortex structural organization	0.0269245	KIF14	1
modulem4	GO:0032185	septin cytoskeleton organization	0.0269245	ANLN	1
modulem4	GO:0033624	negative regulation of integrin activation	0.0269245	KIF14	1
modulem4	GO:0036298	recombinational interstrand cross-link repair	0.0269245	MCM8	1
modulem4	GO:0051309	female meiosis chromosome separation	0.0269245	NCAPH	1
modulem4	GO:0060382	regulation of DNA strand elongation	0.0269245	POT1	1
modulem4	GO:0070194	synaptonemal complex disassembly	0.0269245	PLK1	1
modulem4	GO:1900195	positive regulation of oocyte maturation	0.0269245	AURKA	1
modulem4	GO:1902103	negative regulation of metaphase/anaphase transition of meiotic cell cycle	0.0269245	TTK	1
modulem4	GO:1903436	regulation of mitotic cytokinetic process	0.0269245	KIF20B	1
modulem4	GO:1903438	positive regulation of mitotic cytokinetic process	0.0269245	KIF20B	1
modulem4	GO:1903490	positive regulation of mitotic cytokinesis	0.0269245	KIF20B	1
modulem4	GO:1904170	regulation of bleb assembly	0.0269245	ANLN	1
modulem4	GO:1904172	positive regulation of bleb assembly	0.0269245	ANLN	1
modulem4	GO:1904868	telomerase catalytic core complex assembly	0.0269245	ATR	1
modulem4	GO:1904882	regulation of telomerase catalytic core complex assembly	0.0269245	ATR	1
modulem4	GO:1904884	positive regulation of telomerase catalytic core complex assembly	0.0269245	ATR	1
modulem4	GO:1905133	negative regulation of meiotic chromosome separation	0.0269245	TTK	1
modulem4	GO:1905464	positive regulation of DNA duplex unwinding	0.0269245	POT1	1
modulem4	GO:1905775	negative regulation of DNA helicase activity	0.0269245	MCM2	1
modulem4	GO:1905776	positive regulation of DNA helicase activity	0.0269245	POT1	1
modulem4	GO:0071312	cellular response to alkaloid	0.0279793	CCNA2/SPIDR	2
modulem4	GO:0032205	negative regulation of telomere maintenance	0.0293684	POT1/NBN	2
modulem4	GO:0051973	positive regulation of telomerase activity	0.0293684	NEK2/POT1	2
modulem4	GO:0018210	peptidyl-threonine modification	0.0296824	PLK1/TTK/CDK1	3
modulem4	GO:0032506	cytokinetic process	0.0307787	ECT2/KIF20B	2
modulem4	GO:1900180	regulation of protein localization to nucleus	0.0357657	PLK1/CDK1/ECT2	3
modulem4	GO:0034504	protein localization to nucleus	0.0368528	PLK1/CDK1/ECT2/WRN	4
modulem4	GO:0051445	regulation of meiotic cell cycle	0.0370575	TTK/ASPM	2
modulem4	GO:0007018	microtubule-based movement	0.0370575	KIF2C/KIF11/KIF4A/DLGAP5	4
modulem4	GO:0034080	CENP-A containing nucleosome assembly	0.0370575	CENPA/HJURP	2
modulem4	GO:0061641	CENP-A containing chromatin organization	0.0370575	CENPA/HJURP	2
modulem4	GO:0014038	regulation of Schwann cell differentiation	0.0370575	CDK1	1
modulem4	GO:0030997	regulation of centriole-centriole cohesion	0.0370575	NEK2	1
modulem4	GO:0042148	strand invasion	0.0370575	WRN	1
modulem4	GO:0044785	metaphase/anaphase transition of meiotic cell cycle	0.0370575	TTK	1
modulem4	GO:0060282	positive regulation of oocyte development	0.0370575	AURKA	1
modulem4	GO:0071314	cellular response to cocaine	0.0370575	CCNA2	1
modulem4	GO:0071373	cellular response to luteinizing hormone stimulus	0.0370575	CCNA2	1
modulem4	GO:0097694	establishment of RNA localization to telomere	0.0370575	ATR	1
modulem4	GO:0097695	establishment of protein-containing complex localization to telomere	0.0370575	ATR	1
modulem4	GO:1901994	negative regulation of meiotic cell cycle phase transition	0.0370575	TTK	1
modulem4	GO:1902102	regulation of metaphase/anaphase transition of meiotic cell cycle	0.0370575	TTK	1
modulem4	GO:1905132	regulation of meiotic chromosome separation	0.0370575	TTK	1
modulem4	GO:1905319	mesenchymal stem cell migration	0.0370575	FBXO5	1
modulem4	GO:1905320	regulation of mesenchymal stem cell migration	0.0370575	FBXO5	1
modulem4	GO:1905322	positive regulation of mesenchymal stem cell migration	0.0370575	FBXO5	1
modulem4	GO:1905463	negative regulation of DNA duplex unwinding	0.0370575	MCM2	1
modulem4	GO:1905881	positive regulation of oogenesis	0.0370575	AURKA	1
modulem4	GO:0048599	oocyte development	0.0400057	FBXO5/AURKA	2
modulem4	GO:0006998	nuclear envelope organization	0.0416435	PLK1/CDK1	2
modulem4	GO:0031055	chromatin remodeling at centromere	0.043305	CENPA/HJURP	2
modulem4	GO:0002204	somatic recombination of immunoglobulin genes involved in immune response	0.0446085	NBN/MSH6	2
modulem4	GO:0002208	somatic diversification of immunoglobulins involved in immune response	0.0446085	NBN/MSH6	2
modulem4	GO:0045190	isotype switching	0.0446085	NBN/MSH6	2
modulem4	GO:0051438	regulation of ubiquitin-protein transferase activity	0.0446085	PLK1/FBXO5	2
modulem4	GO:0045840	positive regulation of mitotic nuclear division	0.0455126	DLGAP5/AURKA	2
modulem4	GO:0051972	regulation of telomerase activity	0.0455126	NEK2/POT1	2
modulem4	GO:2000241	regulation of reproductive process	0.0455126	TTK/ASPM/AURKA	3
modulem4	GO:0009994	oocyte differentiation	0.0455126	FBXO5/AURKA	2
modulem4	GO:0016447	somatic recombination of immunoglobulin gene segments	0.0455126	NBN/MSH6	2
modulem4	GO:0090102	cochlea development	0.0455126	MCM2/CCNA2	2
modulem4	GO:0000912	assembly of actomyosin apparatus involved in cytokinesis	0.0455126	ECT2	1
modulem4	GO:0000915	actomyosin contractile ring assembly	0.0455126	ECT2	1
modulem4	GO:0007079	mitotic chromosome movement towards spindle pole	0.0455126	DLGAP5	1
modulem4	GO:0009786	regulation of asymmetric cell division	0.0455126	ASPM	1
modulem4	GO:0030951	establishment or maintenance of microtubule cytoskeleton polarity	0.0455126	KIF2C	1
modulem4	GO:0031860	telomeric 3' overhang formation	0.0455126	NBN	1
modulem4	GO:0032202	telomere assembly	0.0455126	POT1	1
modulem4	GO:0032487	regulation of Rap protein signal transduction	0.0455126	KIF14	1
modulem4	GO:0033313	meiotic cell cycle checkpoint	0.0455126	TTK	1
modulem4	GO:0033314	mitotic DNA replication checkpoint	0.0455126	CLSPN	1
modulem4	GO:0034699	response to luteinizing hormone	0.0455126	CCNA2	1
modulem4	GO:0072757	cellular response to camptothecin	0.0455126	SPIDR	1
modulem4	GO:0090521	glomerular visceral epithelial cell migration	0.0455126	ANLN	1
modulem4	GO:0097680	double-strand break repair via classical nonhomologous end joining	0.0455126	XRCC6	1
modulem4	GO:1905340	regulation of protein localization to kinetochore	0.0455126	NDC80	1
modulem4	GO:1905342	positive regulation of protein localization to kinetochore	0.0455126	NDC80	1
modulem4	GO:0036297	interstrand cross-link repair	0.047117	MCM8/ATR	2
modulem4	GO:0070192	chromosome organization involved in meiotic cell cycle	0.0505157	SMC2/NCAPH	2
modulem4	GO:0140056	organelle localization by membrane tethering	0.0505157	PLK1/CDK1/NEK2	3
modulem4	GO:0051290	protein heterotetramerization	0.0521963	RRM1/XRCC6	2
modulem4	GO:0016579	protein deubiquitination	0.0526452	CDK1/CCNA2/USP32/CLSPN	4
modulem4	GO:0002381	immunoglobulin production involved in immunoglobulin mediated immune response	0.0546046	NBN/MSH6	2
modulem4	GO:0016445	somatic diversification of immunoglobulins	0.0546046	NBN/MSH6	2
modulem4	GO:0043486	histone exchange	0.0546046	CENPA/HJURP	2
modulem4	GO:0030174	regulation of DNA-dependent DNA replication initiation	0.0546046	NBN	1
modulem4	GO:0044771	meiotic cell cycle phase transition	0.0546046	TTK	1
modulem4	GO:0044837	actomyosin contractile ring organization	0.0546046	ECT2	1
modulem4	GO:0051097	negative regulation of helicase activity	0.0546046	MCM2	1
modulem4	GO:1901563	response to camptothecin	0.0546046	SPIDR	1
modulem4	GO:1901993	regulation of meiotic cell cycle phase transition	0.0546046	TTK	1
modulem4	GO:1905448	positive regulation of mitochondrial ATP synthesis coupled electron transport	0.0546046	CDK1	1
modulem4	GO:0006977	DNA damage response, signal transduction by p53 class mediator resulting in cell cycle arrest	0.0561309	CDK1/AURKA	2
modulem4	GO:0090305	nucleic acid phosphodiester bond hydrolysis	0.0563597	RFC3/RFC4/WRN/POLD3	4
modulem4	GO:0022406	membrane docking	0.057169	PLK1/CDK1/NEK2	3
modulem4	GO:0072431	signal transduction involved in mitotic G1 DNA damage checkpoint	0.057443	CDK1/AURKA	2
modulem4	GO:1902400	intracellular signal transduction involved in G1 DNA damage checkpoint	0.057443	CDK1/AURKA	2
modulem4	GO:0070646	protein modification by small protein removal	0.0592512	CDK1/CCNA2/USP32/CLSPN	4
modulem4	GO:0072413	signal transduction involved in mitotic cell cycle checkpoint	0.0606672	CDK1/AURKA	2
modulem4	GO:1902402	signal transduction involved in mitotic DNA damage checkpoint	0.0606672	CDK1/AURKA	2
modulem4	GO:1902403	signal transduction involved in mitotic DNA integrity checkpoint	0.0606672	CDK1/AURKA	2
modulem4	GO:0002562	somatic diversification of immune receptors via germline recombination within a single locus	0.0617681	NBN/MSH6	2
modulem4	GO:0016444	somatic cell DNA recombination	0.0617681	NBN/MSH6	2
modulem4	GO:0051785	positive regulation of nuclear division	0.0617681	DLGAP5/AURKA	2
modulem4	GO:0001302	replicative cell aging	0.0617681	WRN	1
modulem4	GO:0006348	chromatin silencing at telomere	0.0617681	HAT1	1
modulem4	GO:0030952	establishment or maintenance of cytoskeleton polarity	0.0617681	KIF2C	1
modulem4	GO:0045842	positive regulation of mitotic metaphase/anaphase transition	0.0617681	DLGAP5	1
modulem4	GO:0051661	maintenance of centrosome location	0.0617681	ASPM	1
modulem4	GO:0090166	Golgi disassembly	0.0617681	CDK1	1
modulem4	GO:1901970	positive regulation of mitotic sister chromatid separation	0.0617681	DLGAP5	1
modulem4	GO:1902412	regulation of mitotic cytokinesis	0.0617681	KIF20B	1
modulem4	GO:1905323	telomerase holoenzyme complex assembly	0.0617681	ATR	1
modulem4	GO:2000371	regulation of DNA topoisomerase (ATP-hydrolyzing) activity	0.0617681	NCAPH	1
modulem4	GO:2000373	positive regulation of DNA topoisomerase (ATP-hydrolyzing) activity	0.0617681	NCAPH	1
modulem4	GO:0031571	mitotic G1 DNA damage checkpoint	0.0659334	CDK1/AURKA	2
modulem4	GO:0044819	mitotic G1/S transition checkpoint	0.0659334	CDK1/AURKA	2
modulem4	GO:0044783	G1 DNA damage checkpoint	0.0677306	CDK1/AURKA	2
modulem4	GO:0034614	cellular response to reactive oxygen species	0.0689294	CDK1/CCNA2/ECT2	3
modulem4	GO:0048469	cell maturation	0.0689294	FBXO5/KIF14/AURKA	3
modulem4	GO:0021873	forebrain neuroblast division	0.0689294	ASPM	1
modulem4	GO:0033504	floor plate development	0.0689294	STIL	1
modulem4	GO:0040009	regulation of growth rate	0.0689294	WRN	1
modulem4	GO:0044806	G-quadruplex DNA unwinding	0.0689294	WRN	1
modulem4	GO:0051256	mitotic spindle midzone assembly	0.0689294	KIF4A	1
modulem4	GO:0051305	chromosome movement towards spindle pole	0.0689294	DLGAP5	1
modulem4	GO:0071475	cellular hyperosmotic salinity response	0.0689294	XRCC6	1
modulem4	GO:0090232	positive regulation of spindle checkpoint	0.0689294	NDC80	1
modulem4	GO:0090267	positive regulation of mitotic cell cycle spindle assembly checkpoint	0.0689294	NDC80	1
modulem4	GO:0090435	protein localization to nuclear envelope	0.0689294	PLK1	1
modulem4	GO:1900193	regulation of oocyte maturation	0.0689294	AURKA	1
modulem4	GO:1901857	positive regulation of cellular respiration	0.0689294	CDK1	1
modulem4	GO:1902101	positive regulation of metaphase/anaphase transition of cell cycle	0.0689294	DLGAP5	1
modulem4	GO:0034599	cellular response to oxidative stress	0.070461	CDK1/CCNA2/MELK/ECT2	4
modulem4	GO:0002200	somatic diversification of immune receptors	0.0708489	NBN/MSH6	2
modulem4	GO:0006979	response to oxidative stress	0.0710913	CDK1/CCNA2/MELK/ECT2/WRN	5
modulem4	GO:0032436	positive regulation of proteasomal ubiquitin-dependent protein catabolic process	0.0724831	PLK1/AURKA	2
modulem4	GO:0002478	antigen processing and presentation of exogenous peptide antigen	0.0755987	KIF2C/KIF11/KIF4A	3
modulem4	GO:0000733	DNA strand renaturation	0.0755987	RECQL	1
modulem4	GO:0045835	negative regulation of meiotic nuclear division	0.0755987	TTK	1
modulem4	GO:0072396	response to cell cycle checkpoint signaling	0.0755987	SMC1A	1
modulem4	GO:0072402	response to DNA integrity checkpoint signaling	0.0755987	SMC1A	1
modulem4	GO:0072423	response to DNA damage checkpoint signaling	0.0755987	SMC1A	1
modulem4	GO:0075713	establishment of integrated proviral latency	0.0755987	XRCC6	1
modulem4	GO:1903431	positive regulation of cell maturation	0.0755987	AURKA	1
modulem4	GO:1903862	positive regulation of oxidative phosphorylation	0.0755987	CDK1	1
modulem4	GO:1904354	negative regulation of telomere capping	0.0755987	NBN	1
modulem4	GO:1904776	regulation of protein localization to cell cortex	0.0755987	PLK1	1
modulem4	GO:1905446	regulation of mitochondrial ATP synthesis coupled electron transport	0.0755987	CDK1	1
modulem4	GO:1905820	positive regulation of chromosome separation	0.0755987	DLGAP5	1
modulem4	GO:0019884	antigen processing and presentation of exogenous antigen	0.0755987	KIF2C/KIF11/KIF4A	3
modulem4	GO:0002312	B cell activation involved in immune response	0.075768	NBN/MSH6	2
modulem4	GO:0009416	response to light stimulus	0.075768	DTL/WRN/MSH6/ATR	4
modulem4	GO:2000045	regulation of G1/S transition of mitotic cell cycle	0.0761873	CDK1/KIF14/AURKA	3
modulem4	GO:0010911	regulation of isomerase activity	0.0823774	NCAPH	1
modulem4	GO:0010912	positive regulation of isomerase activity	0.0823774	NCAPH	1
modulem4	GO:0019043	establishment of viral latency	0.0823774	XRCC6	1
modulem4	GO:0021683	cerebellar granular layer morphogenesis	0.0823774	KIF14	1
modulem4	GO:0045876	positive regulation of sister chromatid cohesion	0.0823774	RAD21	1
modulem4	GO:0060281	regulation of oocyte development	0.0823774	AURKA	1
modulem4	GO:1901978	positive regulation of cell cycle checkpoint	0.0823774	NDC80	1
modulem4	GO:1904667	negative regulation of ubiquitin protein ligase activity	0.0823774	FBXO5	1
modulem4	GO:1905879	regulation of oogenesis	0.0823774	AURKA	1
modulem4	GO:1990314	cellular response to insulin-like growth factor stimulus	0.0823774	CCNA2	1
modulem4	GO:1902115	regulation of organelle assembly	0.0831814	PLK1/SMC1A/STIL	3
modulem4	GO:0043044	ATP-dependent chromatin remodeling	0.0853928	CENPA/HJURP	2
modulem4	GO:0048002	antigen processing and presentation of peptide antigen	0.0862434	KIF2C/KIF11/KIF4A	3
modulem4	GO:0001578	microtubule bundle formation	0.0870516	PLK1/PRC1	2
modulem4	GO:0009263	deoxyribonucleotide biosynthetic process	0.0897587	RRM1	1
modulem4	GO:0051255	spindle midzone assembly	0.0897587	KIF4A	1
modulem4	GO:0051657	maintenance of organelle location	0.0897587	ASPM	1
modulem4	GO:0072697	protein localization to cell cortex	0.0897587	PLK1	1
modulem4	GO:0045732	positive regulation of protein catabolic process	0.0897587	PLK1/DTL/AURKA	3
modulem4	GO:0009798	axis specification	0.0899998	STIL/AURKA	2
modulem4	GO:0031099	regeneration	0.091473	CDK1/CCNA2/AURKA	3
modulem4	GO:0071241	cellular response to inorganic substance	0.091473	CCNA2/ECT2/SPIDR	3
modulem4	GO:0006303	double-strand break repair via nonhomologous end joining	0.091473	XRCC6/NBN	2
modulem4	GO:0071158	positive regulation of cell cycle arrest	0.0931398	CDK1/AURKA	2
modulem4	GO:2000060	positive regulation of ubiquitin-dependent protein catabolic process	0.0931398	PLK1/AURKA	2
modulem4	GO:0000079	regulation of cyclin-dependent protein serine/threonine kinase activity	0.0950081	PLK1/CDKN3	2
modulem4	GO:0016446	somatic hypermutation of immunoglobulin genes	0.0955567	MSH6	1
modulem4	GO:0019042	viral latency	0.0955567	XRCC6	1
modulem4	GO:0032060	bleb assembly	0.0955567	ANLN	1
modulem4	GO:0035404	histone-serine phosphorylation	0.0955567	AURKA	1
modulem4	GO:0051974	negative regulation of telomerase activity	0.0955567	POT1	1
modulem4	GO:0055015	ventricular cardiac muscle cell development	0.0955567	CDK1	1
modulem4	GO:0072711	cellular response to hydroxyurea	0.0955567	SPIDR	1
modulem4	GO:2001020	regulation of response to DNA damage stimulus	0.0974959	FBXO5/SPIDR/ATR	3
modulem4	GO:0001701	in utero embryonic development	0.0981144	STIL/NEK2/PALB2/NBN	4
modulem4	GO:0001843	neural tube closure	0.099228	STIL/KIF20B	2
modulem4	GO:0060606	tube closure	0.100903	STIL/KIF20B	2
modulem4	GO:1904029	regulation of cyclin-dependent protein kinase activity	0.100903	PLK1/CDKN3	2
modulem4	GO:0002566	somatic diversification of immune receptors via somatic mutation	0.10154	MSH6	1
modulem4	GO:0010457	centriole-centriole cohesion	0.10154	NEK2	1
modulem4	GO:0021681	cerebellar granular layer development	0.10154	KIF14	1
modulem4	GO:0070202	regulation of establishment of protein localization to chromosome	0.10154	SPIDR	1
modulem4	GO:0071472	cellular response to salt stress	0.10154	XRCC6	1
modulem4	GO:0072710	response to hydroxyurea	0.10154	SPIDR	1
modulem4	GO:1904668	positive regulation of ubiquitin protein ligase activity	0.10154	PLK1	1
modulem4	GO:0000726	non-recombinational repair	0.103424	XRCC6/NBN	2
modulem4	GO:0042176	regulation of protein catabolic process	0.106337	PLK1/DTL/FAM83D/AURKA	4
modulem4	GO:0001833	inner cell mass cell proliferation	0.106755	PALB2	1
modulem4	GO:0006206	pyrimidine nucleobase metabolic process	0.106755	RRM1	1
modulem4	GO:0021692	cerebellar Purkinje cell layer morphogenesis	0.106755	KIF14	1
modulem4	GO:0033623	regulation of integrin activation	0.106755	KIF14	1
modulem4	GO:0036445	neuronal stem cell division	0.106755	ASPM	1
modulem4	GO:0042538	hyperosmotic salinity response	0.106755	XRCC6	1
modulem4	GO:0048308	organelle inheritance	0.106755	CDK1	1
modulem4	GO:0048313	Golgi inheritance	0.106755	CDK1	1
modulem4	GO:0051447	negative regulation of meiotic cell cycle	0.106755	TTK	1
modulem4	GO:0055057	neuroblast division	0.106755	ASPM	1
modulem4	GO:0062033	positive regulation of mitotic sister chromatid segregation	0.106755	DLGAP5	1
modulem4	GO:0014020	primary neural tube formation	0.106755	STIL/KIF20B	2
modulem4	GO:2001022	positive regulation of response to DNA damage stimulus	0.106755	SPIDR/ATR	2
modulem4	GO:0051261	protein depolymerization	0.108413	KIF2C/CKAP2	2
modulem4	GO:1901800	positive regulation of proteasomal protein catabolic process	0.108413	PLK1/AURKA	2
modulem5	GO:0000209	protein polyubiquitination	2.32675e-17	UBE2D1/RLIM/RNF6/TRIP12/SMURF2/FBXO41/LMO7/UBE2E3/MGRN1/UBE2G1/HUWE1/FBXL4/FBXW11/FBXL16/DTX3L/CCNF	16
modulem5	GO:0043687	post-translational protein modification	1.44304e-08	FBXO41/UBE2M/LMO7/KBTBD7/KLHL5/KBTBD6/FBXL4/FBXW11/FBXL16/CCNF/CUL2	11
modulem5	GO:0070936	protein K48-linked ubiquitination	1.31174e-05	UBE2D1/RNF6/UBE2E3/UBE2G1/DTX3L	5
modulem5	GO:0031396	regulation of protein ubiquitination	0.000284263	UBE2D1/TRIP12/UFL1/HUWE1/DTX3L/ARRDC4	6
modulem5	GO:1903320	regulation of protein modification by small protein conjugation or removal	0.000479567	UBE2D1/TRIP12/UFL1/HUWE1/DTX3L/ARRDC4	6
modulem5	GO:0016574	histone ubiquitination	0.00802965	TRIP12/HUWE1/DTX3L	3
modulem5	GO:0070534	protein K63-linked ubiquitination	0.00802965	TRIP12/UBE2E3/UBE2G1	3
modulem5	GO:0006513	protein monoubiquitination	0.0197096	MGRN1/HUWE1/DTX3L	3
modulem5	GO:0051865	protein autoubiquitination	0.0209026	LTN1/SH3RF1/DTX3L	3
modulem5	GO:2001185	regulation of CD8-positive, alpha-beta T cell activation	0.0219989	SOCS1/SH3RF1	2
modulem5	GO:0031397	negative regulation of protein ubiquitination	0.0227332	TRIP12/UFL1/DTX3L	3
modulem5	GO:1903321	negative regulation of protein modification by small protein conjugation or removal	0.0299337	TRIP12/UFL1/DTX3L	3
modulem5	GO:0036037	CD8-positive, alpha-beta T cell activation	0.0369106	SOCS1/SH3RF1	2
modulem5	GO:1902914	regulation of protein polyubiquitination	0.0408506	UBE2D1/TRIP12	2
modulem5	GO:0033522	histone H2A ubiquitination	0.0413919	TRIP12/DTX3L	2
modulem5	GO:0031398	positive regulation of protein ubiquitination	0.0458514	UBE2D1/HUWE1/ARRDC4	3
modulem5	GO:1903322	positive regulation of protein modification by small protein conjugation or removal	0.0666408	UBE2D1/HUWE1/ARRDC4	3
modulem5	GO:0006284	base-excision repair	0.0795521	USP47/HUWE1	2
modulem5	GO:0043161	proteasome-mediated ubiquitin-dependent protein catabolic process	0.0974319	UBE2D1/UFL1/FBXW11/CCNF	4
modulem5	GO:0043370	regulation of CD4-positive, alpha-beta T cell differentiation	0.0974319	SOCS1/SH3RF1	2
modulem5	GO:0051438	regulation of ubiquitin-protein transferase activity	0.0974319	DTX3L/ARRDC4	2
modulem5	GO:0043377	negative regulation of CD8-positive, alpha-beta T cell differentiation	0.0974319	SOCS1	1
modulem5	GO:0060816	random inactivation of X chromosome	0.0974319	RLIM	1
modulem5	GO:0008333	endosome to lysosome transport	0.0984738	MGRN1/DTX3L	2
modulem5	GO:0033183	negative regulation of histone ubiquitination	0.113226	TRIP12	1
modulem5	GO:1901314	regulation of histone H2A K63-linked ubiquitination	0.113226	TRIP12	1
modulem5	GO:1901315	negative regulation of histone H2A K63-linked ubiquitination	0.113226	TRIP12	1
modulem5	GO:1901664	regulation of NAD+ ADP-ribosyltransferase activity	0.113226	DTX3L	1
modulem5	GO:1901666	positive regulation of NAD+ ADP-ribosyltransferase activity	0.113226	DTX3L	1
modulem5	GO:2000514	regulation of CD4-positive, alpha-beta T cell activation	0.113226	SOCS1/SH3RF1	2
modulem5	GO:0010498	proteasomal protein catabolic process	0.117106	UBE2D1/UFL1/FBXW11/CCNF	4
modulem5	GO:0046637	regulation of alpha-beta T cell differentiation	0.120573	SOCS1/SH3RF1	2
modulem5	GO:2001020	regulation of response to DNA damage stimulus	0.121671	TRIP12/USP47/DTX3L	3
modulem5	GO:0003415	chondrocyte hypertrophy	0.12177	MEX3C	1
modulem5	GO:0031146	SCF-dependent proteasomal ubiquitin-dependent protein catabolic process	0.12177	FBXW11/CCNF	2
modulem5	GO:2000779	regulation of double-strand break repair	0.12177	TRIP12/DTX3L	2
modulem5	GO:0043367	CD4-positive, alpha-beta T cell differentiation	0.12177	SOCS1/SH3RF1	2
modulem5	GO:0000320	re-entry into mitotic cell cycle	0.12177	CCNF	1
modulem5	GO:0030579	ubiquitin-dependent SMAD protein catabolic process	0.12177	SMURF2	1
modulem5	GO:0044314	protein K27-linked ubiquitination	0.12177	RNF6	1
modulem5	GO:0070535	histone H2A K63-linked ubiquitination	0.12177	TRIP12	1
modulem5	GO:1990564	protein polyufmylation	0.12177	UFL1	1
modulem5	GO:1990592	protein K69-linked ufmylation	0.12177	UFL1	1
modulem5	GO:2000646	positive regulation of receptor catabolic process	0.12177	DTX3L	1
modulem5	GO:0033143	regulation of intracellular steroid hormone receptor signaling pathway	0.12177	RNF6/UFL1	2
modulem5	GO:0045088	regulation of innate immune response	0.12177	UBE2D1/SOCS1/PJA2/FBXW11	4
modulem5	GO:0043154	negative regulation of cysteine-type endopeptidase activity involved in apoptotic process	0.12177	USP47/SH3RF1	2
modulem5	GO:2001021	negative regulation of response to DNA damage stimulus	0.12177	TRIP12/USP47	2
modulem5	GO:0034137	positive regulation of toll-like receptor 2 signaling pathway	0.12177	PJA2	1
modulem5	GO:0035740	CD8-positive, alpha-beta T cell proliferation	0.12177	SH3RF1	1
modulem5	GO:0043376	regulation of CD8-positive, alpha-beta T cell differentiation	0.12177	SOCS1	1
modulem5	GO:0071569	protein ufmylation	0.12177	UFL1	1
modulem5	GO:1901165	positive regulation of trophoblast cell migration	0.12177	SMURF2	1
modulem5	GO:2000564	regulation of CD8-positive, alpha-beta T cell proliferation	0.12177	SH3RF1	1
modulem5	GO:2001186	negative regulation of CD8-positive, alpha-beta T cell activation	0.12177	SOCS1	1
modulem5	GO:2000117	negative regulation of cysteine-type endopeptidase activity	0.128172	USP47/SH3RF1	2
modulem5	GO:0035710	CD4-positive, alpha-beta T cell activation	0.132002	SOCS1/SH3RF1	2
modulem5	GO:0046634	regulation of alpha-beta T cell activation	0.132002	SOCS1/SH3RF1	2
modulem5	GO:0016579	protein deubiquitination	0.135013	UBE2D1/SMURF2/USP47	3
modulem5	GO:0007041	lysosomal transport	0.135013	MGRN1/DTX3L	2
modulem5	GO:0010533	regulation of activation of Janus kinase activity	0.135013	SOCS1	1
modulem5	GO:0085020	protein K6-linked ubiquitination	0.135013	RNF6	1
modulem5	GO:1900045	negative regulation of protein K63-linked ubiquitination	0.135013	TRIP12	1
modulem5	GO:1902965	regulation of protein localization to early endosome	0.135013	DTX3L	1
modulem5	GO:1902966	positive regulation of protein localization to early endosome	0.135013	DTX3L	1
modulem5	GO:0051403	stress-activated MAPK cascade	0.135013	PJA2/SH3RF1/FBXW11	3
modulem5	GO:0046632	alpha-beta T cell differentiation	0.135013	SOCS1/SH3RF1	2
modulem5	GO:0070646	protein modification by small protein removal	0.135013	UBE2D1/SMURF2/USP47	3
modulem5	GO:0031098	stress-activated protein kinase signaling cascade	0.135371	PJA2/SH3RF1/FBXW11	3
modulem5	GO:0007034	vacuolar transport	0.135371	MGRN1/DTX3L	2
modulem5	GO:0033182	regulation of histone ubiquitination	0.135371	TRIP12	1
modulem5	GO:0035520	monoubiquitinated protein deubiquitination	0.135371	USP47	1
modulem5	GO:1902946	protein localization to early endosome	0.135371	DTX3L	1
modulem5	GO:2000644	regulation of receptor catabolic process	0.135371	DTX3L	1
modulem5	GO:0043200	response to amino acid	0.139112	SOCS1/UFL1	2
modulem5	GO:0034135	regulation of toll-like receptor 2 signaling pathway	0.144415	PJA2	1
modulem5	GO:1902915	negative regulation of protein polyubiquitination	0.144415	TRIP12	1
modulem5	GO:0002758	innate immune response-activating signal transduction	0.146447	UBE2D1/PJA2/FBXW11	3
modulem5	GO:0006282	regulation of DNA repair	0.146447	TRIP12/DTX3L	2
modulem5	GO:0033523	histone H2B ubiquitination	0.147234	DTX3L	1
modulem5	GO:0045116	protein neddylation	0.147234	UBE2M	1
modulem5	GO:1902065	response to L-glutamate	0.147234	UFL1	1
modulem5	GO:1905668	positive regulation of protein localization to endosome	0.147234	DTX3L	1
modulem5	GO:0010826	negative regulation of centrosome duplication	0.149649	CCNF	1
modulem5	GO:0061450	trophoblast cell migration	0.149649	SMURF2	1
modulem5	GO:1900044	regulation of protein K63-linked ubiquitination	0.149649	TRIP12	1
modulem5	GO:1901163	regulation of trophoblast cell migration	0.149649	SMURF2	1
modulem5	GO:1902916	positive regulation of protein polyubiquitination	0.149649	UBE2D1	1
modulem5	GO:1905666	regulation of protein localization to endosome	0.149649	DTX3L	1
modulem5	GO:0002218	activation of innate immune response	0.151737	UBE2D1/PJA2/FBXW11	3
modulem5	GO:0046330	positive regulation of JNK cascade	0.151737	PJA2/SH3RF1	2
modulem5	GO:0035563	positive regulation of chromatin binding	0.151737	DTX3L	1
modulem5	GO:0042532	negative regulation of tyrosine phosphorylation of STAT protein	0.151737	SOCS1	1
modulem5	GO:0043374	CD8-positive, alpha-beta T cell differentiation	0.151737	SOCS1	1
modulem5	GO:2001034	positive regulation of double-strand break repair via nonhomologous end joining	0.151737	DTX3L	1
modulem5	GO:0030518	intracellular steroid hormone receptor signaling pathway	0.156658	RNF6/UFL1	2
modulem5	GO:0042976	activation of Janus kinase activity	0.156658	SOCS1	1
modulem5	GO:0045591	positive regulation of regulatory T cell differentiation	0.156658	SOCS1	1
modulem5	GO:0046606	negative regulation of centrosome cycle	0.156658	CCNF	1
modulem5	GO:0046631	alpha-beta T cell activation	0.159272	SOCS1/SH3RF1	2
modulem5	GO:0030509	BMP signaling pathway	0.159891	UBE2D1/SMURF2	2
modulem5	GO:0090263	positive regulation of canonical Wnt signaling pathway	0.16051	SMURF2/USP47	2
modulem5	GO:0034134	toll-like receptor 2 signaling pathway	0.161177	PJA2	1
modulem5	GO:0045580	regulation of T cell differentiation	0.16612	SOCS1/SH3RF1	2
modulem5	GO:0009048	dosage compensation by inactivation of X chromosome	0.166898	RLIM	1
modulem5	GO:0051444	negative regulation of ubiquitin-protein transferase activity	0.166898	DTX3L	1
modulem5	GO:0042753	positive regulation of circadian rhythm	0.174036	FBXW11	1
modulem5	GO:0002224	toll-like receptor signaling pathway	0.174036	UBE2D1/PJA2	2
modulem5	GO:0071772	response to BMP	0.174036	UBE2D1/SMURF2	2
modulem5	GO:0071773	cellular response to BMP stimulus	0.174036	UBE2D1/SMURF2	2
modulem5	GO:0007549	dosage compensation	0.177366	RLIM	1
modulem5	GO:0090026	positive regulation of monocyte chemotaxis	0.177366	MOSPD2	1
modulem5	GO:0045089	positive regulation of innate immune response	0.181785	UBE2D1/PJA2/FBXW11	3
modulem5	GO:0010738	regulation of protein kinase A signaling	0.181785	PJA2	1
modulem5	GO:0060252	positive regulation of glial cell proliferation	0.181785	UFL1	1
modulem5	GO:0032874	positive regulation of stress-activated MAPK cascade	0.181785	PJA2/SH3RF1	2
modulem5	GO:0070304	positive regulation of stress-activated protein kinase signaling cascade	0.182352	PJA2/SH3RF1	2
modulem5	GO:0045619	regulation of lymphocyte differentiation	0.197371	SOCS1/SH3RF1	2
modulem5	GO:0036010	protein localization to endosome	0.197371	DTX3L	1
modulem5	GO:0140112	extracellular vesicle biogenesis	0.197371	ARRDC4	1
modulem5	GO:2001032	regulation of double-strand break repair via nonhomologous end joining	0.197371	DTX3L	1
modulem5	GO:0046328	regulation of JNK cascade	0.197371	PJA2/SH3RF1	2
modulem5	GO:0030177	positive regulation of Wnt signaling pathway	0.197371	SMURF2/USP47	2
modulem5	GO:0043433	negative regulation of DNA-binding transcription factor activity	0.197371	RLIM/UFL1	2
modulem5	GO:0030517	negative regulation of axon extension	0.197371	RNF6	1
modulem5	GO:0034123	positive regulation of toll-like receptor signaling pathway	0.197371	PJA2	1
modulem5	GO:0035561	regulation of chromatin binding	0.197371	DTX3L	1
modulem5	GO:0071677	positive regulation of mononuclear cell migration	0.197371	MOSPD2	1
modulem5	GO:0043951	negative regulation of cAMP-mediated signaling	0.201046	MGRN1	1
modulem5	GO:0046639	negative regulation of alpha-beta T cell differentiation	0.201046	SOCS1	1
modulem5	GO:0090023	positive regulation of neutrophil chemotaxis	0.201046	MOSPD2	1
modulem5	GO:0046426	negative regulation of JAK-STAT cascade	0.203026	SOCS1	1
modulem5	GO:0060330	regulation of response to interferon-gamma	0.203026	SOCS1	1
modulem5	GO:0060334	regulation of interferon-gamma-mediated signaling pathway	0.203026	SOCS1	1
modulem5	GO:0090025	regulation of monocyte chemotaxis	0.203026	MOSPD2	1
modulem5	GO:0016570	histone modification	0.203338	TRIP12/HUWE1/DTX3L	3
modulem5	GO:0043401	steroid hormone mediated signaling pathway	0.203604	RNF6/UFL1	2
modulem5	GO:0002230	positive regulation of defense response to virus by host	0.204878	DTX3L	1
modulem5	GO:0071624	positive regulation of granulocyte chemotaxis	0.204878	MOSPD2	1
modulem6	GO:0048193	Golgi vesicle transport	8.0465e-34	TMED2/SPTBN1/KIF3A/KIF3B/TFG/SEC24A/SEC31A/SEC24D/SEC24B/SEC16A/RINT1/DCTN1/GOLPH3/COPG1/COPB1/COPA/GBF1/KLC2/ARFGAP3/COPB2/KIF16B/COG5/ARCN1/ARF1	24
modulem6	GO:0006888	ER to Golgi vesicle-mediated transport	1.72216e-28	TMED2/SPTBN1/TFG/SEC24A/SEC31A/SEC24D/SEC24B/SEC16A/RINT1/DCTN1/COPG1/COPB1/COPA/GBF1/ARFGAP3/COPB2/COG5/ARCN1/ARF1	19
modulem6	GO:0006890	retrograde vesicle-mediated transport, Golgi to ER	6.38219e-19	TMED2/KIF3A/KIF3B/RINT1/COPG1/COPB1/COPA/GBF1/KLC2/ARFGAP3/COPB2/ARCN1	12
modulem6	GO:0006900	vesicle budding from membrane	6.71246e-14	TMED2/TFG/SEC24A/SEC31A/SEC24D/SEC24B/SEC16A/GOLPH3/GBF1/ARF1	10
modulem6	GO:0048194	Golgi vesicle budding	8.28614e-13	TMED2/TFG/SEC24A/SEC31A/SEC24D/SEC24B/SEC16A/GOLPH3/GBF1	9
modulem6	GO:0051650	establishment of vesicle localization	9.06989e-13	TMED2/KIF3A/KIF3B/TFG/SEC24A/SEC31A/SEC24D/SEC24B/SEC16A/KIF1B/GBF1/ARF1	12
modulem6	GO:0051656	establishment of organelle localization	9.06989e-13	TMED2/KIF3A/KIF3B/TFG/SEC24A/SEC31A/SEC24D/SEC24B/SEC16A/DCTN1/COPG1/KIF1B/GBF1/ARF1	14
modulem6	GO:0051648	vesicle localization	1.54198e-12	TMED2/KIF3A/KIF3B/TFG/SEC24A/SEC31A/SEC24D/SEC24B/SEC16A/KIF1B/GBF1/ARF1	12
modulem6	GO:0019886	antigen processing and presentation of exogenous peptide antigen via MHC class II	5.10617e-12	KIF3A/KIF3B/SEC24A/SEC31A/SEC24D/SEC24B/DCTN1/KLC2/ARF1	9
modulem6	GO:0002495	antigen processing and presentation of peptide antigen via MHC class II	6.07644e-12	KIF3A/KIF3B/SEC24A/SEC31A/SEC24D/SEC24B/DCTN1/KLC2/ARF1	9
modulem6	GO:0002504	antigen processing and presentation of peptide or polysaccharide antigen via MHC class II	6.07644e-12	KIF3A/KIF3B/SEC24A/SEC31A/SEC24D/SEC24B/DCTN1/KLC2/ARF1	9
modulem6	GO:0006901	vesicle coating	1.34573e-11	TMED2/TFG/SEC24A/SEC31A/SEC24D/SEC24B/SEC16A/GBF1	8
modulem6	GO:0048199	vesicle targeting, to, from or within Golgi	1.79152e-11	TMED2/TFG/SEC24A/SEC31A/SEC24D/SEC24B/SEC16A/GBF1	8
modulem6	GO:0006903	vesicle targeting	1.2166e-10	TMED2/TFG/SEC24A/SEC31A/SEC24D/SEC24B/SEC16A/GBF1	8
modulem6	GO:0002478	antigen processing and presentation of exogenous peptide antigen	6.39913e-10	KIF3A/KIF3B/SEC24A/SEC31A/SEC24D/SEC24B/DCTN1/KLC2/ARF1	9
modulem6	GO:0019884	antigen processing and presentation of exogenous antigen	6.64978e-10	KIF3A/KIF3B/SEC24A/SEC31A/SEC24D/SEC24B/DCTN1/KLC2/ARF1	9
modulem6	GO:0048207	vesicle targeting, rough ER to cis-Golgi	6.85502e-10	TMED2/TFG/SEC24A/SEC31A/SEC24D/SEC24B/SEC16A	7
modulem6	GO:0048208	COPII vesicle coating	6.85502e-10	TMED2/TFG/SEC24A/SEC31A/SEC24D/SEC24B/SEC16A	7
modulem6	GO:0048002	antigen processing and presentation of peptide antigen	1.01336e-09	KIF3A/KIF3B/SEC24A/SEC31A/SEC24D/SEC24B/DCTN1/KLC2/ARF1	9
modulem6	GO:0090114	COPII-coated vesicle budding	1.05585e-09	TMED2/TFG/SEC24A/SEC31A/SEC24D/SEC24B/SEC16A	7
modulem6	GO:0016050	vesicle organization	1.11562e-09	TMED2/TFG/SEC24A/SEC31A/SEC24D/SEC24B/SEC16A/GOLPH3/GBF1/ARF1	10
modulem6	GO:0035459	cargo loading into vesicle	1.70199e-09	TMED2/SEC24A/SEC31A/SEC24D/SEC24B	5
modulem6	GO:0019882	antigen processing and presentation	3.41523e-09	KIF3A/KIF3B/SEC24A/SEC31A/SEC24D/SEC24B/DCTN1/KLC2/ARF1	9
modulem6	GO:0090110	cargo loading into COPII-coated vesicle	1.13517e-07	SEC24A/SEC31A/SEC24D/SEC24B	4
modulem6	GO:0007018	microtubule-based movement	2.97884e-06	IFT80/KIF3A/KIF3B/COPG1/KIF1B/KLC2/KIF13B	7
modulem6	GO:0006892	post-Golgi vesicle-mediated transport	6.0331e-06	SPTBN1/SEC16A/GOLPH3/GBF1/KIF16B	5
modulem6	GO:0060628	regulation of ER to Golgi vesicle-mediated transport	3.59286e-05	SEC24B/RINT1/ARF1	3
modulem6	GO:0030010	establishment of cell polarity	6.51059e-05	KIF20B/DCTN1/GOLPH3/ARFGEF1/GBF1	5
modulem6	GO:0010256	endomembrane system organization	6.82955e-05	TMED2/SPTBN1/SEC16A/DCTN1/GOLPH3/ARFGEF1/GBF1	7
modulem6	GO:0006891	intra-Golgi vesicle-mediated transport	7.65095e-05	COPB1/COPB2/COG5	3
modulem6	GO:0010970	transport along microtubule	0.000106011	IFT80/KIF3A/KIF3B/COPG1/KIF1B	5
modulem6	GO:0099111	microtubule-based transport	0.000106011	IFT80/KIF3A/KIF3B/COPG1/KIF1B	5
modulem6	GO:0030705	cytoskeleton-dependent intracellular transport	0.000147608	IFT80/KIF3A/KIF3B/COPG1/KIF1B	5
modulem6	GO:0072384	organelle transport along microtubule	0.000163246	KIF3A/KIF3B/COPG1/KIF1B	4
modulem6	GO:0007163	establishment or maintenance of cell polarity	0.000238099	KIF20B/DCTN1/GOLPH3/ARFGEF1/GBF1	5
modulem6	GO:0035964	COPI-coated vesicle budding	0.000314651	TMED2/GBF1	2
modulem6	GO:0048200	Golgi transport vesicle coating	0.000314651	TMED2/GBF1	2
modulem6	GO:0048205	COPI coating of Golgi vesicle	0.000314651	TMED2/GBF1	2
modulem6	GO:0070973	protein localization to endoplasmic reticulum exit site	0.000314651	SEC16A/GBF1	2
modulem6	GO:0007030	Golgi organization	0.000378687	TMED2/GOLPH3/ARFGEF1/GBF1	4
modulem6	GO:0002474	antigen processing and presentation of peptide antigen via MHC class I	0.000385208	SEC24A/SEC31A/SEC24D/SEC24B	4
modulem6	GO:0043001	Golgi to plasma membrane protein transport	0.000391427	SPTBN1/SEC16A/GOLPH3	3
modulem6	GO:0047496	vesicle transport along microtubule	0.00064554	KIF3A/KIF3B/KIF1B	3
modulem6	GO:0035735	intraciliary transport involved in cilium assembly	0.000737064	IFT80/KIF3A/KIF3B	3
modulem6	GO:0006893	Golgi to plasma membrane transport	0.00087743	SPTBN1/SEC16A/GOLPH3	3
modulem6	GO:0099518	vesicle cytoskeletal trafficking	0.00087743	KIF3A/KIF3B/KIF1B	3
modulem6	GO:0072383	plus-end-directed vesicle transport along microtubule	0.00091077	KIF3A/KIF3B	2
modulem6	GO:0051668	localization within membrane	0.000995144	SEC24A/SEC31A/SEC24D/SEC24B	4
modulem6	GO:0042073	intraciliary transport	0.00109637	IFT80/KIF3A/KIF3B	3
modulem6	GO:0061951	establishment of protein localization to plasma membrane	0.00109637	SPTBN1/SEC16A/GOLPH3	3
modulem6	GO:0034454	microtubule anchoring at centrosome	0.00109637	KIF3A/DCTN1	2
modulem6	GO:0072386	plus-end-directed organelle transport along microtubule	0.00109637	KIF3A/KIF3B	2
modulem6	GO:0016482	cytosolic transport	0.00135639	DCTN1/KIF1B/GBF1/KIF16B	4
modulem6	GO:1990778	protein localization to cell periphery	0.00147256	TMED2/SPTBN1/SEC16A/GOLPH3/KIF1B	5
modulem6	GO:0000910	cytokinesis	0.00157817	KIF20B/SPTBN1/KIF3B/ARF1	4
modulem6	GO:0072393	microtubule anchoring at microtubule organizing center	0.00163251	KIF3A/DCTN1	2
modulem6	GO:0010457	centriole-centriole cohesion	0.0023471	KIF3A/DCTN1	2
modulem6	GO:0000281	mitotic cytokinesis	0.00286273	KIF20B/SPTBN1/ARF1	3
modulem6	GO:0098876	vesicle-mediated transport to the plasma membrane	0.00293665	SPTBN1/SEC16A/GOLPH3	3
modulem6	GO:0032271	regulation of protein polymerization	0.00314462	SPTBN1/DCTN1/ARFGEF1/ARF1	4
modulem6	GO:0006895	Golgi to endosome transport	0.00347751	GBF1/KIF16B	2
modulem6	GO:0061640	cytoskeleton-dependent cytokinesis	0.00445585	KIF20B/SPTBN1/ARF1	3
modulem6	GO:0032011	ARF protein signal transduction	0.00481356	ARFGEF1/GBF1	2
modulem6	GO:0032012	regulation of ARF protein signal transduction	0.00481356	ARFGEF1/GBF1	2
modulem6	GO:0001843	neural tube closure	0.00488778	KIF20B/TMED2/SEC24B	3
modulem6	GO:0060606	tube closure	0.00497961	KIF20B/TMED2/SEC24B	3
modulem6	GO:0014020	primary neural tube formation	0.00577656	KIF20B/TMED2/SEC24B	3
modulem6	GO:2000114	regulation of establishment of cell polarity	0.00619744	KIF20B/ARFGEF1	2
modulem6	GO:0051222	positive regulation of protein transport	0.00659234	KIF20B/SPTBN1/SEC24A/GOLPH3/ARF1	5
modulem6	GO:0034067	protein localization to Golgi apparatus	0.00661502	GOLPH3/GBF1	2
modulem6	GO:0043254	regulation of protein complex assembly	0.00675449	SPTBN1/SEC24B/DCTN1/ARFGEF1/ARF1	5
modulem6	GO:0051258	protein polymerization	0.00675449	SPTBN1/DCTN1/ARFGEF1/ARF1	4
modulem6	GO:0001841	neural tube formation	0.00675449	KIF20B/TMED2/SEC24B	3
modulem6	GO:0032878	regulation of establishment or maintenance of cell polarity	0.00675449	KIF20B/ARFGEF1	2
modulem6	GO:0034453	microtubule anchoring	0.00675449	KIF3A/DCTN1	2
modulem6	GO:0072659	protein localization to plasma membrane	0.00700486	TMED2/SPTBN1/SEC16A/GOLPH3	4
modulem6	GO:1902410	mitotic cytokinetic process	0.00716915	KIF20B/ARF1	2
modulem6	GO:1904951	positive regulation of establishment of protein localization	0.00865303	KIF20B/SPTBN1/SEC24A/GOLPH3/ARF1	5
modulem6	GO:0007098	centrosome cycle	0.00867889	KIF3A/KIF3B/DCTN1	3
modulem6	GO:0050714	positive regulation of protein secretion	0.00886354	SPTBN1/SEC24A/GOLPH3/ARF1	4
modulem6	GO:0050708	regulation of protein secretion	0.00977052	SPTBN1/SEC24A/GOLPH3/ARFIP1/ARF1	5
modulem6	GO:0001838	embryonic epithelial tube formation	0.0102035	KIF20B/TMED2/SEC24B	3
modulem6	GO:0031023	microtubule organizing center organization	0.0105719	KIF3A/KIF3B/DCTN1	3
modulem6	GO:0002793	positive regulation of peptide secretion	0.010995	SPTBN1/SEC24A/GOLPH3/ARF1	4
modulem6	GO:0072175	epithelial tube formation	0.0118389	KIF20B/TMED2/SEC24B	3
modulem6	GO:0002791	regulation of peptide secretion	0.0118389	SPTBN1/SEC24A/GOLPH3/ARFIP1/ARF1	5
modulem6	GO:0030833	regulation of actin filament polymerization	0.0118389	SPTBN1/ARFGEF1/ARF1	3
modulem6	GO:0055108	Golgi to transport vesicle transport	0.0128738	ARF1	1
modulem6	GO:0090284	positive regulation of protein glycosylation in Golgi	0.0128738	ARFGEF1	1
modulem6	GO:1903420	protein localization to endoplasmic reticulum tubular network	0.0128738	GBF1	1
modulem6	GO:1904647	response to rotenone	0.0128738	KIF1B	1
modulem6	GO:1990386	mitotic cleavage furrow ingression	0.0128738	ARF1	1
modulem6	GO:0032467	positive regulation of cytokinesis	0.0139671	KIF20B/KIF3B	2
modulem6	GO:0032506	cytokinetic process	0.0139671	KIF20B/ARF1	2
modulem6	GO:0035148	tube formation	0.0148462	KIF20B/TMED2/SEC24B	3
modulem6	GO:0030041	actin filament polymerization	0.0149838	SPTBN1/ARFGEF1/ARF1	3
modulem6	GO:0016331	morphogenesis of embryonic epithelium	0.0151071	KIF20B/TMED2/SEC24B	3
modulem6	GO:1902903	regulation of supramolecular fiber organization	0.0151071	SPTBN1/DCTN1/ARFGEF1/ARF1	4
modulem6	GO:0008064	regulation of actin polymerization or depolymerization	0.0151071	SPTBN1/ARFGEF1/ARF1	3
modulem6	GO:0030832	regulation of actin filament length	0.015247	SPTBN1/ARFGEF1/ARF1	3
modulem6	GO:0021915	neural tube development	0.0172108	KIF20B/TMED2/SEC24B	3
modulem6	GO:0008089	anterograde axonal transport	0.0173359	KIF3B/KIF1B	2
modulem6	GO:0060271	cilium assembly	0.0183938	IFT80/KIF3A/KIF3B/DCTN1	4
modulem6	GO:0030837	negative regulation of actin filament polymerization	0.0193994	SPTBN1/ARFGEF1	2
modulem6	GO:0044782	cilium organization	0.0193994	IFT80/KIF3A/KIF3B/DCTN1	4
modulem6	GO:0008154	actin polymerization or depolymerization	0.0193994	SPTBN1/ARFGEF1/ARF1	3
modulem6	GO:0034260	negative regulation of GTPase activity	0.0193994	TMED2/ARFGEF1	2
modulem6	GO:1905515	non-motile cilium assembly	0.0193994	IFT80/DCTN1	2
modulem6	GO:0021590	cerebellum maturation	0.0193994	ARCN1	1
modulem6	GO:0021691	cerebellar Purkinje cell layer maturation	0.0193994	ARCN1	1
modulem6	GO:0021699	cerebellar cortex maturation	0.0193994	ARCN1	1
modulem6	GO:0036090	cleavage furrow ingression	0.0193994	ARF1	1
modulem6	GO:0045053	protein retention in Golgi apparatus	0.0193994	GOLPH3	1
modulem6	GO:0090164	asymmetric Golgi ribbon formation	0.0193994	GOLPH3	1
modulem6	GO:0097111	endoplasmic reticulum-Golgi intermediate compartment organization	0.0193994	GBF1	1
modulem6	GO:1901301	regulation of cargo loading into COPII-coated vesicle	0.0193994	SEC24B	1
modulem6	GO:1902504	regulation of signal transduction involved in mitotic G2 DNA damage checkpoint	0.0193994	RINT1	1
modulem6	GO:1902824	positive regulation of late endosome to lysosome transport	0.0193994	ARF1	1
modulem6	GO:1903337	positive regulation of vacuolar transport	0.0193994	ARF1	1
modulem6	GO:1903436	regulation of mitotic cytokinetic process	0.0193994	KIF20B	1
modulem6	GO:1903438	positive regulation of mitotic cytokinetic process	0.0193994	KIF20B	1
modulem6	GO:1903490	positive regulation of mitotic cytokinesis	0.0193994	KIF20B	1
modulem6	GO:0098930	axonal transport	0.0201186	KIF3B/KIF1B	2
modulem6	GO:0043112	receptor metabolic process	0.0203773	SEC24A/KIF16B/ARF1	3
modulem6	GO:0098586	cellular response to virus	0.0229551	GBF1/ARF1	2
modulem6	GO:1903532	positive regulation of secretion by cell	0.0238061	SPTBN1/SEC24A/GOLPH3/ARF1	4
modulem6	GO:0032272	negative regulation of protein polymerization	0.0258083	SPTBN1/ARFGEF1	2
modulem6	GO:0008088	axo-dendritic transport	0.0258083	KIF3B/KIF1B	2
modulem6	GO:0021747	cochlear nucleus development	0.0258083	SEC24B	1
modulem6	GO:0032954	regulation of cytokinetic process	0.0258083	KIF20B	1
modulem6	GO:0043000	Golgi to plasma membrane CFTR protein transport	0.0258083	SEC16A	1
modulem6	GO:0070142	synaptic vesicle budding	0.0258083	ARF1	1
modulem6	GO:0072434	signal transduction involved in mitotic G2 DNA damage checkpoint	0.0258083	RINT1	1
modulem6	GO:0090283	regulation of protein glycosylation in Golgi	0.0258083	ARFGEF1	1
modulem6	GO:0097212	lysosomal membrane organization	0.0258083	ARF1	1
modulem6	GO:1900042	positive regulation of interleukin-2 secretion	0.0258083	SPTBN1	1
modulem6	GO:1904289	regulation of mitotic DNA damage checkpoint	0.0258083	RINT1	1
modulem6	GO:0032386	regulation of intracellular transport	0.0258083	KIF20B/SEC24B/RINT1/ARF1	4
modulem6	GO:0048857	neural nucleus development	0.0260832	SEC24B/SEC16A	2
modulem6	GO:0036498	IRE1-mediated unfolded protein response	0.0267163	SEC31A/DCTN1	2
modulem6	GO:0051047	positive regulation of secretion	0.0273115	SPTBN1/SEC24A/GOLPH3/ARF1	4
modulem6	GO:0043087	regulation of GTPase activity	0.0273523	TMED2/ARFGEF1/ARFGAP3/SEC23B	4
modulem6	GO:0090063	positive regulation of microtubule nucleation	0.0325881	DCTN1	1
modulem6	GO:1902822	regulation of late endosome to lysosome transport	0.0325881	ARF1	1
modulem6	GO:1902953	positive regulation of ER to Golgi vesicle-mediated transport	0.0325881	ARF1	1
modulem6	GO:0042147	retrograde transport, endosome to Golgi	0.0331949	DCTN1/GBF1	2
modulem6	GO:0110053	regulation of actin filament organization	0.0346814	SPTBN1/ARFGEF1/ARF1	3
modulem6	GO:0031503	protein-containing complex localization	0.0380741	IFT80/KIF3A/KIF3B	3
modulem6	GO:0021578	hindbrain maturation	0.0380741	ARCN1	1
modulem6	GO:0033578	protein glycosylation in Golgi	0.0380741	ARFGEF1	1
modulem6	GO:0070070	proton-transporting V-type ATPase complex assembly	0.0380741	VMA21	1
modulem6	GO:0070072	vacuolar proton-transporting V-type ATPase complex assembly	0.0380741	VMA21	1
modulem6	GO:1903335	regulation of vacuolar transport	0.0380741	ARF1	1
modulem6	GO:1904398	positive regulation of neuromuscular junction development	0.0380741	DCTN1	1
modulem6	GO:1990049	retrograde neuronal dense core vesicle transport	0.0380741	KIF1B	1
modulem6	GO:0051493	regulation of cytoskeleton organization	0.0405591	SPTBN1/DCTN1/ARFGEF1/ARF1	4
modulem6	GO:0032465	regulation of cytokinesis	0.0406002	KIF20B/KIF3B	2
modulem6	GO:0051781	positive regulation of cell division	0.0412815	KIF20B/KIF3B	2
modulem6	GO:0106027	neuron projection organization	0.0419638	DCTN1/ARF1	2
modulem6	GO:0034976	response to endoplasmic reticulum stress	0.0423693	SEC31A/SEC16A/DCTN1	3
modulem6	GO:0007182	common-partner SMAD protein phosphorylation	0.0423693	SPTBN1	1
modulem6	GO:0010968	regulation of microtubule nucleation	0.0423693	DCTN1	1
modulem6	GO:0021626	central nervous system maturation	0.0423693	ARCN1	1
modulem6	GO:0061156	pulmonary artery morphogenesis	0.0423693	SEC24B	1
modulem6	GO:0090166	Golgi disassembly	0.0423693	GBF1	1
modulem6	GO:1902412	regulation of mitotic cytokinesis	0.0423693	KIF20B	1
modulem6	GO:2000051	negative regulation of non-canonical Wnt signaling pathway	0.0423693	IFT80	1
modulem6	GO:0060462	lung lobe development	0.0474315	SEC24B	1
modulem6	GO:0060463	lung lobe morphogenesis	0.0474315	SEC24B	1
modulem6	GO:0061744	motor behavior	0.0474315	DCTN1	1
modulem6	GO:1900040	regulation of interleukin-2 secretion	0.0474315	SPTBN1	1
modulem6	GO:1902774	late endosome to lysosome transport	0.0474315	ARF1	1
modulem6	GO:1990048	anterograde neuronal dense core vesicle transport	0.0474315	KIF1B	1
modulem6	GO:0007052	mitotic spindle organization	0.0474315	KIF3B/DCTN1	2
modulem6	GO:0007270	neuron-neuron synaptic transmission	0.0526141	KIF1B	1
modulem6	GO:0032253	dense core granule localization	0.0526141	KIF1B	1
modulem6	GO:0051683	establishment of Golgi localization	0.0526141	COPG1	1
modulem6	GO:0099519	dense core granule cytoskeletal transport	0.0526141	KIF1B	1
modulem6	GO:1901950	dense core granule transport	0.0526141	KIF1B	1
modulem6	GO:0090150	establishment of protein localization to membrane	0.0527659	SPTBN1/SEC16A/GOLPH3	3
modulem6	GO:0022037	metencephalon development	0.0566097	SEC24B/ARCN1	2
modulem6	GO:0032956	regulation of actin cytoskeleton organization	0.0566097	SPTBN1/ARFGEF1/ARF1	3
modulem6	GO:0045714	regulation of low-density lipoprotein particle receptor biosynthetic process	0.0566097	SEC24A	1
modulem6	GO:0060050	positive regulation of protein glycosylation	0.0566097	ARFGEF1	1
modulem6	GO:0060982	coronary artery morphogenesis	0.0566097	SEC24B	1
modulem6	GO:0070970	interleukin-2 secretion	0.0566097	SPTBN1	1
modulem6	GO:0098974	postsynaptic actin cytoskeleton organization	0.0566097	ARF1	1
modulem6	GO:0030968	endoplasmic reticulum unfolded protein response	0.0596552	SEC31A/DCTN1	2
modulem6	GO:0007368	determination of left/right symmetry	0.0596552	TMED2/KIF3B	2
modulem6	GO:0006878	cellular copper ion homeostasis	0.0596552	ARF1	1
modulem6	GO:0021548	pons development	0.0596552	SEC24B	1
modulem6	GO:0032525	somite rostral/caudal axis specification	0.0596552	TMED2	1
modulem6	GO:0045713	low-density lipoprotein particle receptor biosynthetic process	0.0596552	SEC24A	1
modulem6	GO:0060088	auditory receptor cell stereocilium organization	0.0596552	SEC24B	1
modulem6	GO:0060352	cell adhesion molecule production	0.0596552	GOLPH3	1
modulem6	GO:0070071	proton-transporting two-sector ATPase complex assembly	0.0596552	VMA21	1
modulem6	GO:1990535	neuron projection maintenance	0.0596552	DCTN1	1
modulem6	GO:0060562	epithelial tube morphogenesis	0.0602291	KIF20B/TMED2/SEC24B	3
modulem6	GO:0032273	positive regulation of protein polymerization	0.0602291	DCTN1/ARF1	2
modulem6	GO:1902850	microtubule cytoskeleton organization involved in mitosis	0.0602291	KIF3B/DCTN1	2
modulem6	GO:0032535	regulation of cellular component size	0.0604686	SPTBN1/ARFGEF1/ARF1	3
modulem6	GO:0007100	mitotic centrosome separation	0.0626997	KIF3B	1
modulem6	GO:0034379	very-low-density lipoprotein particle assembly	0.0626997	ARF1	1
modulem6	GO:0090178	regulation of establishment of planar polarity involved in neural tube closure	0.0626997	SEC24B	1
modulem6	GO:0099188	postsynaptic cytoskeleton organization	0.0626997	ARF1	1
modulem6	GO:1904396	regulation of neuromuscular junction development	0.0626997	DCTN1	1
modulem6	GO:0007015	actin filament organization	0.0636627	SPTBN1/ARFGEF1/ARF1	3
modulem6	GO:1902904	negative regulation of supramolecular fiber organization	0.0636627	SPTBN1/ARFGEF1	2
modulem6	GO:0009855	determination of bilateral symmetry	0.064028	TMED2/KIF3B	2
modulem6	GO:0034620	cellular response to unfolded protein	0.064028	SEC31A/DCTN1	2
modulem6	GO:0009799	specification of symmetry	0.0646978	TMED2/KIF3B	2
modulem6	GO:0002093	auditory receptor cell morphogenesis	0.0648763	SEC24B	1
modulem6	GO:0030157	pancreatic juice secretion	0.0648763	COPA	1
modulem6	GO:0032252	secretory granule localization	0.0648763	KIF1B	1
modulem6	GO:0051299	centrosome separation	0.0648763	KIF3B	1
modulem6	GO:0090161	Golgi ribbon formation	0.0648763	GOLPH3	1
modulem6	GO:0090177	establishment of planar polarity involved in neural tube closure	0.0648763	SEC24B	1
modulem6	GO:0031333	negative regulation of protein complex assembly	0.0654825	SPTBN1/ARFGEF1	2
modulem6	GO:0051494	negative regulation of cytoskeleton organization	0.0658445	SPTBN1/ARFGEF1	2
modulem6	GO:0070972	protein localization to endoplasmic reticulum	0.0658445	SEC16A/GBF1	2
modulem6	GO:0043547	positive regulation of GTPase activity	0.0666505	ARFGEF1/ARFGAP3/SEC23B	3
modulem6	GO:0032970	regulation of actin filament-based process	0.0671285	SPTBN1/ARFGEF1/ARF1	3
modulem6	GO:0048308	organelle inheritance	0.0671285	GBF1	1
modulem6	GO:0048313	Golgi inheritance	0.0671285	GBF1	1
modulem6	GO:0051645	Golgi localization	0.0671285	COPG1	1
modulem6	GO:0055070	copper ion homeostasis	0.0671285	ARF1	1
modulem6	GO:1902414	protein localization to cell junction	0.0671285	KIF3A	1
modulem6	GO:0035967	cellular response to topologically incorrect protein	0.069771	SEC31A/DCTN1	2
modulem6	GO:0034315	regulation of Arp2/3 complex-mediated actin nucleation	0.069771	ARF1	1
modulem6	GO:0035372	protein localization to microtubule	0.069771	KIF20B	1
modulem6	GO:0042249	establishment of planar polarity of embryonic epithelium	0.069771	SEC24B	1
modulem6	GO:0060049	regulation of protein glycosylation	0.069771	ARFGEF1	1
modulem6	GO:0072425	signal transduction involved in G2 DNA damage checkpoint	0.069771	RINT1	1
modulem6	GO:0099558	maintenance of synapse structure	0.069771	DCTN1	1
modulem6	GO:2001224	positive regulation of neuron migration	0.069771	KIF20B	1
modulem6	GO:1905276	regulation of epithelial tube formation	0.0743737	SEC24B	1
modulem6	GO:0008090	retrograde axonal transport	0.077391	KIF1B	1
modulem6	GO:0030397	membrane disassembly	0.077391	DCTN1	1
modulem6	GO:0051081	nuclear envelope disassembly	0.077391	DCTN1	1
modulem6	GO:0060117	auditory receptor cell development	0.077391	SEC24B	1
modulem6	GO:2000001	regulation of DNA damage checkpoint	0.077391	RINT1	1
modulem6	GO:0007051	spindle organization	0.077391	KIF3B/DCTN1	2
modulem6	GO:0030902	hindbrain development	0.0799969	SEC24B/ARCN1	2
modulem6	GO:0017085	response to insecticide	0.0813861	KIF1B	1
modulem6	GO:0007274	neuromuscular synaptic transmission	0.0850535	KIF1B	1
modulem6	GO:0036342	post-anal tail morphogenesis	0.0850535	TMED2	1
modulem6	GO:0060977	coronary vasculature morphogenesis	0.0850535	SEC24B	1
modulem6	GO:0006986	response to unfolded protein	0.087574	SEC31A/DCTN1	2
modulem6	GO:0007095	mitotic G2 DNA damage checkpoint	0.087574	RINT1	1
modulem6	GO:0034643	establishment of mitochondrion localization, microtubule-mediated	0.087574	KIF1B	1
modulem6	GO:0047497	mitochondrion transport along microtubule	0.087574	KIF1B	1
modulem6	GO:0060716	labyrinthine layer blood vessel development	0.087574	TMED2	1
modulem6	GO:1902307	positive regulation of sodium ion transmembrane transport	0.087574	ARF1	1
modulem6	GO:0051302	regulation of cell division	0.0881409	KIF20B/KIF3B	2
modulem6	GO:0007020	microtubule nucleation	0.0903188	DCTN1	1
modulem6	GO:0010560	positive regulation of glycoprotein biosynthetic process	0.0903188	ARFGEF1	1
modulem6	GO:0010869	regulation of receptor biosynthetic process	0.0903188	SEC24A	1
modulem6	GO:0061162	establishment of monopolar cell polarity	0.0903188	GBF1	1
modulem6	GO:0061339	establishment or maintenance of monopolar cell polarity	0.0943872	GBF1	1
modulem6	GO:0032799	low-density lipoprotein receptor particle metabolic process	0.0969256	SEC24A	1
modulem6	GO:0045956	positive regulation of calcium ion-dependent exocytosis	0.0969256	ARF1	1
modulem6	GO:0051654	establishment of mitochondrion localization	0.0969256	KIF1B	1
modulem6	GO:0060390	regulation of SMAD protein signal transduction	0.0969256	SPTBN1	1
modulem6	GO:2000050	regulation of non-canonical Wnt signaling pathway	0.0969256	IFT80	1
modulem6	GO:0035966	response to topologically incorrect protein	0.0972325	SEC31A/DCTN1	2
modulem6	GO:0001919	regulation of receptor recycling	0.0997329	KIF16B	1
modulem6	GO:0044818	mitotic G2/M transition checkpoint	0.0997329	RINT1	1
modulem6	GO:0051125	regulation of actin nucleation	0.0997329	ARF1	1
modulem6	GO:0000132	establishment of mitotic spindle orientation	0.10245	DCTN1	1
modulem6	GO:0021680	cerebellar Purkinje cell layer development	0.10245	ARCN1	1
modulem6	GO:0032800	receptor biosynthetic process	0.10245	SEC24A	1
modulem6	GO:1903020	positive regulation of glycoprotein metabolic process	0.10245	ARFGEF1	1
modulem6	GO:0010389	regulation of G2/M transition of mitotic cell cycle	0.103979	RINT1/DCTN1	2
modulem6	GO:1902905	positive regulation of supramolecular fiber organization	0.103979	DCTN1/ARF1	2
modulem6	GO:0090066	regulation of anatomical structure size	0.105082	SPTBN1/ARFGEF1/ARF1	3
modulem6	GO:0050901	leukocyte tethering or rolling	0.105082	GOLPH3	1
modulem6	GO:0016197	endosomal transport	0.105876	DCTN1/GBF1	2
modulem6	GO:0034377	plasma lipoprotein particle assembly	0.108406	ARF1	1
modulem6	GO:0060122	inner ear receptor cell stereocilium organization	0.112075	SEC24B	1
modulem6	GO:0000226	microtubule cytoskeleton organization	0.11402	KIF3A/KIF3B/DCTN1	3
modulem6	GO:0031116	positive regulation of microtubule polymerization	0.114082	DCTN1	1
modulem6	GO:0040001	establishment of mitotic spindle localization	0.114082	DCTN1	1
modulem6	GO:0051294	establishment of spindle orientation	0.114082	DCTN1	1
modulem6	GO:0060292	long-term synaptic depression	0.114082	ARF1	1
modulem7	GO:0006413	translational initiation	1.38074e-26	RPLP0/RPL5/RPL27/RPS12/RPLP1/EIF2A/EIF5B/EIF4G1/EIF2S3/EIF4E/EIF3G/EIF3E/EIF3I/EIF3D/EIF4H/EIF4B/DENR/EIF1AX	18
modulem7	GO:0000184	nuclear-transcribed mRNA catabolic process, nonsense-mediated decay	3.09909e-11	RPLP0/RPL5/RPL27/RPS12/RPLP1/EIF4G1/EIF3E/SECISBP2/GSPT1	9
modulem7	GO:0002183	cytoplasmic translational initiation	3.32983e-10	EIF4G1/EIF3G/EIF3E/EIF3I/EIF3D/DENR	6
modulem7	GO:0006614	SRP-dependent cotranslational protein targeting to membrane	3.32983e-10	RPLP0/SRP54/RPL5/RPL27/RPS12/RPLP1/SSR3/TRAM1	8
modulem7	GO:0006613	cotranslational protein targeting to membrane	3.32983e-10	RPLP0/SRP54/RPL5/RPL27/RPS12/RPLP1/SSR3/TRAM1	8
modulem7	GO:0045047	protein targeting to ER	3.32983e-10	RPLP0/SRP54/RPL5/RPL27/RPS12/RPLP1/SSR3/TRAM1	8
modulem7	GO:0072599	establishment of protein localization to endoplasmic reticulum	3.83829e-10	RPLP0/SRP54/RPL5/RPL27/RPS12/RPLP1/SSR3/TRAM1	8
modulem7	GO:0006417	regulation of translation	7.24593e-10	RPL5/EIF5A2/EIF2A/EIF5B/EIF4G1/EIF4E/EIF3E/EIF3D/EIF4H/EIF4B/METAP1	11
modulem7	GO:0000956	nuclear-transcribed mRNA catabolic process	7.24593e-10	RPLP0/RPL5/RPL27/RPS12/RPLP1/EIF4G1/EIF3E/SECISBP2/GSPT1	9
modulem7	GO:0070972	protein localization to endoplasmic reticulum	7.93808e-10	RPLP0/SRP54/RPL5/RPL27/RPS12/RPLP1/SSR3/TRAM1	8
modulem7	GO:0034248	regulation of cellular amide metabolic process	2.14194e-09	RPL5/EIF5A2/EIF2A/EIF5B/EIF4G1/EIF4E/EIF3E/EIF3D/EIF4H/EIF4B/METAP1	11
modulem7	GO:0006612	protein targeting to membrane	5.61004e-09	RPLP0/SRP54/RPL5/RPL27/RPS12/RPLP1/SSR3/TRAM1	8
modulem7	GO:0019080	viral gene expression	1.50901e-08	RPLP0/RPL5/RPL27/RPS12/RPLP1/EIF3G/EIF3D/DENR	8
modulem7	GO:0002181	cytoplasmic translation	2.92929e-08	EIF4G1/EIF3G/EIF3E/EIF3I/EIF3D/DENR	6
modulem7	GO:0006402	mRNA catabolic process	5.20996e-08	RPLP0/RPL5/RPL27/RPS12/RPLP1/EIF4G1/EIF3E/SECISBP2/GSPT1	9
modulem7	GO:0006401	RNA catabolic process	1.02581e-07	RPLP0/RPL5/RPL27/RPS12/RPLP1/EIF4G1/EIF3E/SECISBP2/GSPT1	9
modulem7	GO:0001732	formation of cytoplasmic translation initiation complex	1.05626e-07	EIF3G/EIF3E/EIF3I/EIF3D	4
modulem7	GO:0090150	establishment of protein localization to membrane	2.67904e-07	RPLP0/SRP54/RPL5/RPL27/RPS12/RPLP1/SSR3/TRAM1	8
modulem7	GO:0022618	ribonucleoprotein complex assembly	6.45046e-07	RPL5/EIF2A/EIF3G/EIF3E/EIF3I/EIF3D/DENR	7
modulem7	GO:0006414	translational elongation	7.16925e-07	MRPS9/MRPS10/MRPL11/RPLP1/MRPL3/EIF5A2	6
modulem7	GO:0071826	ribonucleoprotein complex subunit organization	8.55788e-07	RPL5/EIF2A/EIF3G/EIF3E/EIF3I/EIF3D/DENR	7
modulem7	GO:0006446	regulation of translational initiation	1.24925e-06	EIF5B/EIF4G1/EIF3E/EIF4H/EIF4B	5
modulem7	GO:0006605	protein targeting	1.3165e-06	RPLP0/SRP54/RPL5/RPL27/RPS12/RPLP1/SSR3/TRAM1	8
modulem7	GO:1902416	positive regulation of mRNA binding	1.71843e-06	EIF4G1/EIF3E/EIF3D	3
modulem7	GO:0022613	ribonucleoprotein complex biogenesis	1.71843e-06	RPL5/RPL27/EIF2A/EIF3G/EIF3E/EIF3I/EIF3D/DENR	8
modulem7	GO:1905216	positive regulation of RNA binding	2.57823e-06	EIF4G1/EIF3E/EIF3D	3
modulem7	GO:1902415	regulation of mRNA binding	3.7199e-06	EIF4G1/EIF3E/EIF3D	3
modulem7	GO:0072594	establishment of protein localization to organelle	5.62992e-06	RPLP0/SRP54/RPL5/RPL27/RPS12/RPLP1/SSR3/TRAM1	8
modulem7	GO:0006415	translational termination	6.12352e-06	MRPS9/MRPS10/MRPL11/MRPL3/EIF5A2	5
modulem7	GO:1905214	regulation of RNA binding	6.56139e-06	EIF4G1/EIF3E/EIF3D	3
modulem7	GO:0019081	viral translation	1.39605e-05	EIF3G/EIF3D/DENR	3
modulem7	GO:0002191	cap-dependent translational initiation	7.2118e-05	EIF4G1/EIF3D	2
modulem7	GO:0032984	protein-containing complex disassembly	7.35869e-05	MRPS9/MRPS10/MRPL11/MRPL3/EIF5A2/DENR	6
modulem7	GO:0019083	viral transcription	8.67237e-05	RPLP0/RPL5/RPL27/RPS12/RPLP1	5
modulem7	GO:0070125	mitochondrial translational elongation	0.000100103	MRPS9/MRPS10/MRPL11/MRPL3	4
modulem7	GO:0070126	mitochondrial translational termination	0.000106622	MRPS9/MRPS10/MRPL11/MRPL3	4
modulem7	GO:0043624	cellular protein complex disassembly	0.000127322	MRPS9/MRPS10/MRPL11/MRPL3/EIF5A2	5
modulem7	GO:0006616	SRP-dependent cotranslational protein targeting to membrane, translocation	0.000196835	SRP54/TRAM1	2
modulem7	GO:0075525	viral translational termination-reinitiation	0.000196835	EIF3G/EIF3D	2
modulem7	GO:0045727	positive regulation of translation	0.000294975	RPL5/EIF5A2/EIF3E/EIF3D	4
modulem7	GO:0032543	mitochondrial translation	0.000372713	MRPS9/MRPS10/MRPL11/MRPL3	4
modulem7	GO:0034250	positive regulation of cellular amide metabolic process	0.000565572	RPL5/EIF5A2/EIF3E/EIF3D	4
modulem7	GO:0140053	mitochondrial gene expression	0.000685158	MRPS9/MRPS10/MRPL11/MRPL3	4
modulem7	GO:0075522	IRES-dependent viral translational initiation	0.000781022	EIF3D/DENR	2
modulem7	GO:0022411	cellular component disassembly	0.000890372	MRPS9/MRPS10/MRPL11/MRPL3/EIF5A2/DENR	6
modulem7	GO:0042255	ribosome assembly	0.00530632	RPL5/EIF2A	2
modulem7	GO:0065002	intracellular protein transmembrane transport	0.00897419	SRP54/TRAM1	2
modulem7	GO:0010509	polyamine homeostasis	0.00897419	EIF5A2	1
modulem7	GO:0097010	eukaryotic translation initiation factor 4F complex assembly	0.00897419	EIF4G1	1
modulem7	GO:1905535	regulation of eukaryotic translation initiation factor 4F complex assembly	0.00897419	EIF4G1	1
modulem7	GO:1905537	positive regulation of eukaryotic translation initiation factor 4F complex assembly	0.00897419	EIF4G1	1
modulem7	GO:1905610	regulation of mRNA cap binding	0.00897419	EIF4G1	1
modulem7	GO:1905612	positive regulation of mRNA cap binding	0.00897419	EIF4G1	1
modulem7	GO:0001662	behavioral fear response	0.00915756	EIF4G1/EIF4E	2
modulem7	GO:0002209	behavioral defense response	0.0094807	EIF4G1/EIF4E	2
modulem7	GO:0042596	fear response	0.00980453	EIF4G1/EIF4E	2
modulem7	GO:0071806	protein transmembrane transport	0.0122337	SRP54/TRAM1	2
modulem7	GO:1905616	regulation of miRNA mediated inhibition of translation	0.0154392	EIF4G1	1
modulem7	GO:1905618	positive regulation of miRNA mediated inhibition of translation	0.0154392	EIF4G1	1
modulem7	GO:1905696	regulation of polysome binding	0.0154392	EIF4G1	1
modulem7	GO:2000435	negative regulation of protein neddylation	0.0154392	RPL5	1
modulem7	GO:0051099	positive regulation of binding	0.0154392	EIF4G1/EIF3E/EIF3D	3
modulem7	GO:0017148	negative regulation of translation	0.0195415	EIF4G1/EIF4E/EIF3E	3
modulem7	GO:0042254	ribosome biogenesis	0.0203403	RPL5/RPL27/EIF2A	3
modulem7	GO:0006452	translational frameshifting	0.0206462	EIF5A2	1
modulem7	GO:0070084	protein initiator methionine removal	0.0206462	METAP1	1
modulem7	GO:0099578	regulation of translation at postsynapse, modulating synaptic transmission	0.0206462	EIF4E	1
modulem7	GO:0140245	regulation of translation at postsynapse	0.0206462	EIF4E	1
modulem7	GO:2000434	regulation of protein neddylation	0.0206462	RPL5	1
modulem7	GO:0034249	negative regulation of cellular amide metabolic process	0.0226932	EIF4G1/EIF4E/EIF3E	3
modulem7	GO:0033555	multicellular organismal response to stress	0.0250866	EIF4G1/EIF4E	2
modulem7	GO:0045905	positive regulation of translational termination	0.0256475	EIF5A2	1
modulem7	GO:2000622	regulation of nuclear-transcribed mRNA catabolic process, nonsense-mediated decay	0.0256475	SECISBP2	1
modulem7	GO:2000623	negative regulation of nuclear-transcribed mRNA catabolic process, nonsense-mediated decay	0.0256475	SECISBP2	1
modulem7	GO:0031330	negative regulation of cellular catabolic process	0.029257	RPL5/EIF4G1/SECISBP2	3
modulem7	GO:0045901	positive regulation of translational elongation	0.030006	EIF5A2	1
modulem7	GO:0099547	regulation of translation at synapse, modulating synaptic transmission	0.030006	EIF4E	1
modulem7	GO:0140243	regulation of translation at synapse	0.030006	EIF4E	1
modulem7	GO:1904044	response to aldosterone	0.030006	RPL27	1
modulem7	GO:0001731	formation of translation preinitiation complex	0.0353361	DENR	1
modulem7	GO:0000082	G1/S transition of mitotic cell cycle	0.0353361	EIF4G1/EIF4E/GSPT1	3
modulem7	GO:0032790	ribosome disassembly	0.0404061	DENR	1
modulem7	GO:0009895	negative regulation of catabolic process	0.0409659	RPL5/EIF4G1/SECISBP2	3
modulem7	GO:0044843	cell cycle G1/S phase transition	0.0409659	EIF4G1/EIF4E/GSPT1	3
modulem7	GO:0006449	regulation of translational termination	0.0445125	EIF5A2	1
modulem7	GO:0018206	peptidyl-methionine modification	0.0483303	METAP1	1
modulem7	GO:0032933	SREBP signaling pathway	0.0483303	EIF2A	1
modulem7	GO:1904667	negative regulation of ubiquitin protein ligase activity	0.0483303	RPL5	1
modulem7	GO:0071501	cellular response to sterol depletion	0.0530541	EIF2A	1
modulem7	GO:0000027	ribosomal large subunit assembly	0.0558043	RPL5	1
modulem7	GO:0006617	SRP-dependent cotranslational protein targeting to membrane, signal sequence recognition	0.0558043	SRP54	1
modulem7	GO:0006991	response to sterol depletion	0.0558043	EIF2A	1
modulem7	GO:0045116	protein neddylation	0.0558043	RPL5	1
modulem7	GO:0032988	ribonucleoprotein complex disassembly	0.0651436	DENR	1
modulem7	GO:0051098	regulation of binding	0.069261	EIF4G1/EIF3E/EIF3D	3
modulem7	GO:0051028	mRNA transport	0.0731405	EIF5A2/EIF4E	2
modulem7	GO:0051444	negative regulation of ubiquitin-protein transferase activity	0.0767182	RPL5	1
modulem7	GO:0099170	postsynaptic modulation of chemical synaptic transmission	0.0767182	EIF4E	1
modulem7	GO:0006364	rRNA processing	0.0775081	RPL5/RPL27	2
modulem7	GO:0045931	positive regulation of mitotic cell cycle	0.0775081	EIF4G1/EIF4E	2
modulem7	GO:0031960	response to corticosteroid	0.0776639	RPL27/EIF4E	2
modulem7	GO:0045947	negative regulation of translational initiation	0.0827896	EIF3E	1
modulem7	GO:0006448	regulation of translational elongation	0.0856393	EIF5A2	1
modulem7	GO:0021756	striatum development	0.0856393	SECISBP2	1
modulem7	GO:0030324	lung development	0.0875888	EIF4G1/EIF4E	2
modulem7	GO:0010801	negative regulation of peptidyl-threonine phosphorylation	0.0883745	EIF4G1	1
modulem7	GO:0030323	respiratory tube development	0.0897118	EIF4G1/EIF4E	2
modulem7	GO:0050657	nucleic acid transport	0.0908754	EIF5A2/EIF4E	2
modulem7	GO:0050658	RNA transport	0.0908754	EIF5A2/EIF4E	2
modulem7	GO:0061013	regulation of mRNA catabolic process	0.0918559	EIF4G1/SECISBP2	2
modulem7	GO:0051236	establishment of RNA localization	0.0918559	EIF5A2/EIF4E	2
modulem7	GO:1904666	regulation of ubiquitin protein ligase activity	0.0918559	RPL5	1
modulem7	GO:2000637	positive regulation of gene silencing by miRNA	0.0951047	EIF4G1	1
modulem7	GO:0060148	positive regulation of posttranscriptional gene silencing	0.0982899	EIF4G1	1
modulem7	GO:0016072	rRNA metabolic process	0.099077	RPL5/RPL27	2
modulem7	GO:1901654	response to ketone	0.099077	RPL27/EIF4E	2
modulem7	GO:0021544	subpallium development	0.09925	SECISBP2	1
modulem7	GO:0060541	respiratory system development	0.09925	EIF4G1/EIF4E	2
modulem7	GO:0022400	regulation of rhodopsin mediated signaling pathway	0.101843	METAP1	1
modulem7	GO:0031365	N-terminal protein amino acid modification	0.103928	METAP1	1
modulem7	GO:0042273	ribosomal large subunit biogenesis	0.103928	RPL5	1
modulem7	GO:0006403	RNA localization	0.109635	EIF5A2/EIF4E	2
modulem7	GO:0071549	cellular response to dexamethasone stimulus	0.109635	EIF4E	1
modulem7	GO:0016056	rhodopsin mediated signaling pathway	0.111511	METAP1	1
modulem7	GO:1905606	regulation of presynapse assembly	0.111511	EIF4G1	1
modulem8	GO:0097711	ciliary basal body-plasma membrane docking	3.66924e-29	MAPRE1/NEK2/NDE1/CKAP5/YWHAE/YWHAG/IQCB1/CEP97/TUBB4B/TUBB/DYNC1I2/TUBA4A/CCP110/CNTRL/AKAP9/TMEM67/AHI1	17
modulem8	GO:0140056	organelle localization by membrane tethering	1.23736e-28	MAPRE1/NEK2/NDE1/CKAP5/RAB8A/YWHAE/YWHAG/IQCB1/CEP97/TUBB4B/TUBB/DYNC1I2/TUBA4A/CCP110/CNTRL/AKAP9/TMEM67/AHI1	18
modulem8	GO:0022406	membrane docking	2.68149e-28	MAPRE1/NEK2/NDE1/CKAP5/RAB8A/YWHAE/YWHAG/IQCB1/CEP97/TUBB4B/TUBB/DYNC1I2/TUBA4A/CCP110/CNTRL/AKAP9/TMEM67/AHI1	18
modulem8	GO:0060271	cilium assembly	7.05459e-24	MAPRE1/NEK2/NDE1/CKAP5/RAB8A/YWHAE/YWHAG/IQCB1/CEP97/TUBB4B/TUBB/DYNC1I2/TUBA4A/CCP110/CNTRL/AKAP9/TMEM67/ARL13B/AHI1	19
modulem8	GO:0044782	cilium organization	1.05349e-23	MAPRE1/NEK2/NDE1/CKAP5/RAB8A/YWHAE/YWHAG/IQCB1/CEP97/TUBB4B/TUBB/DYNC1I2/TUBA4A/CCP110/CNTRL/AKAP9/TMEM67/ARL13B/AHI1	19
modulem8	GO:0000086	G2/M transition of mitotic cell cycle	8.5327e-23	MAPRE1/TPX2/HMMR/NEK2/NDE1/BORA/AURKA/CKAP5/YWHAE/YWHAG/TUBB4B/TUBB/DYNC1I2/TUBA4A/CCP110/CNTRL/AKAP9	17
modulem8	GO:0010389	regulation of G2/M transition of mitotic cell cycle	1.12286e-22	MAPRE1/TPX2/HMMR/NEK2/NDE1/AURKA/CKAP5/YWHAE/YWHAG/TUBB4B/TUBB/DYNC1I2/TUBA4A/CCP110/CNTRL/AKAP9	16
modulem8	GO:0044839	cell cycle G2/M phase transition	2.43601e-22	MAPRE1/TPX2/HMMR/NEK2/NDE1/BORA/AURKA/CKAP5/YWHAE/YWHAG/TUBB4B/TUBB/DYNC1I2/TUBA4A/CCP110/CNTRL/AKAP9	17
modulem8	GO:1902749	regulation of cell cycle G2/M phase transition	3.72931e-22	MAPRE1/TPX2/HMMR/NEK2/NDE1/AURKA/CKAP5/YWHAE/YWHAG/TUBB4B/TUBB/DYNC1I2/TUBA4A/CCP110/CNTRL/AKAP9	16
modulem8	GO:1901990	regulation of mitotic cell cycle phase transition	6.47977e-17	MAPRE1/TPX2/HMMR/NEK2/NDE1/AURKA/CKAP5/YWHAE/YWHAG/TUBB4B/TUBB/DYNC1I2/TUBA4A/CCP110/CNTRL/AKAP9	16
modulem8	GO:1901987	regulation of cell cycle phase transition	2.13431e-16	MAPRE1/TPX2/HMMR/NEK2/NDE1/AURKA/CKAP5/YWHAE/YWHAG/TUBB4B/TUBB/DYNC1I2/TUBA4A/CCP110/CNTRL/AKAP9	16
modulem8	GO:0000226	microtubule cytoskeleton organization	2.62866e-13	MAPRE1/TPX2/NEK2/NDE1/BORA/AURKA/CKAP5/TACC1/CEP97/SASS6/TUBB/CCP110/AKAP9/TMEM67	14
modulem8	GO:0007051	spindle organization	4.64551e-09	TPX2/NEK2/BORA/AURKA/CKAP5/TACC1/CEP97/TUBB	8
modulem8	GO:0070507	regulation of microtubule cytoskeleton organization	1.38193e-08	MAPRE1/TPX2/NEK2/BORA/AURKA/CEP97/AKAP9/TMEM67	8
modulem8	GO:0007098	centrosome cycle	2.63704e-08	NEK2/NDE1/AURKA/CKAP5/SASS6/CCP110/TMEM67	7
modulem8	GO:0032886	regulation of microtubule-based process	4.23246e-08	MAPRE1/TPX2/NEK2/BORA/AURKA/CEP97/AKAP9/TMEM67	8
modulem8	GO:0031023	microtubule organizing center organization	4.25386e-08	NEK2/NDE1/AURKA/CKAP5/SASS6/CCP110/TMEM67	7
modulem8	GO:0051225	spindle assembly	1.45255e-05	TPX2/NEK2/AURKA/CEP97/TUBB	5
modulem8	GO:0051493	regulation of cytoskeleton organization	2.86784e-05	MAPRE1/TPX2/NEK2/BORA/AURKA/CEP97/AKAP9/TMEM67	8
modulem8	GO:1902850	microtubule cytoskeleton organization involved in mitosis	4.62846e-05	TPX2/NDE1/BORA/TACC1/CEP97	5
modulem8	GO:0051298	centrosome duplication	9.19819e-05	NDE1/SASS6/CCP110/TMEM67	4
modulem8	GO:0007052	mitotic spindle organization	0.000588997	TPX2/BORA/TACC1/CEP97	4
modulem8	GO:0060236	regulation of mitotic spindle organization	0.000975608	TPX2/BORA/CEP97	3
modulem8	GO:0140014	mitotic nuclear division	0.00122585	TPX2/NEK2/BORA/AURKA/CEP97	5
modulem8	GO:0090224	regulation of spindle organization	0.00122585	TPX2/BORA/CEP97	3
modulem8	GO:0046605	regulation of centrosome cycle	0.00270265	NEK2/AURKA/TMEM67	3
modulem8	GO:0007088	regulation of mitotic nuclear division	0.00286522	NEK2/BORA/AURKA/CEP97	4
modulem8	GO:0007100	mitotic centrosome separation	0.00373569	NEK2/AURKA	2
modulem8	GO:0051299	centrosome separation	0.00397113	NEK2/AURKA	2
modulem8	GO:0070986	left/right axis specification	0.00397113	ARL13B/AHI1	2
modulem8	GO:1902018	negative regulation of cilium assembly	0.00397113	CEP97/CCP110	2
modulem8	GO:0046785	microtubule polymerization	0.00397113	MAPRE1/CKAP5/AKAP9	3
modulem8	GO:0051783	regulation of nuclear division	0.00397113	NEK2/BORA/AURKA/CEP97	4
modulem8	GO:0046606	negative regulation of centrosome cycle	0.00507424	NEK2/TMEM67	2
modulem8	GO:0010639	negative regulation of organelle organization	0.005479	MAPRE1/NEK2/CEP97/CCP110/TMEM67	5
[truncated: 506 more rows]
