# Supplementary material for: Exploring the mechanism of resistance to sorafenib in two hepatocellular carcinoma cell lines
Source: Aging (Albany NY). 2020 Nov 21;12(23):24255–69. doi: 10.18632/aging.104195 (PMC7762478; doi:10.18632/aging.104195)
Supplement: Supplementary Table 3 [file aging-12-104195-s004.xlsx]

## Sheet: Sheet1
Supplementary Table 3. Cellular components enriched in sorafenib-resistant cells.
module	ID	Description	p.adjust	geneID	Count
modulem1	GO:0098687	chromosomal region	7.03964e-43	XPO1/ZWILCH/PLK1/NUP160/SMC1A/RAD21/STAG2/PPP2R5A/ESCO2/KNTC1/INCENP/ZW10/TTK/NUP43/RANGAP1/MCM3/MCM5/MCM2/MCM7/MCM6/CDK1/RCC2/KIF2C/NSMCE2/NUF2/NDC80/CDCA8/CENPA/HJURP/CENPF/NEK2/NDE1/CENPK/ERCC6L/DSN1/BUB1/CKAP5/AHCTF1	38
modulem1	GO:0000775	chromosome, centromeric region	5.50426e-40	XPO1/ZWILCH/PLK1/NUP160/SMC1A/RAD21/STAG2/PPP2R5A/ESCO2/KNTC1/INCENP/ZW10/TTK/NUP43/RANGAP1/RCC2/KIF2C/NUF2/NDC80/CDCA8/CENPA/HJURP/CENPF/NEK2/NDE1/CENPK/ERCC6L/DSN1/BUB1/CKAP5/AHCTF1	31
modulem1	GO:0000793	condensed chromosome	1.0761e-33	ZWILCH/PLK1/SMC1A/RAD21/STAG2/KNTC1/INCENP/ZW10/NUP43/RANGAP1/SMC2/NCAPD2/KIF2C/NCAPH/NSMCE2/NDC80/CENPA/HJURP/CENPF/MKI67/NEK2/NDE1/CENPK/ERCC6L/DSN1/BUB1/CKAP5/AHCTF1	28
modulem1	GO:0000776	kinetochore	1.78707e-33	XPO1/ZWILCH/PLK1/NUP160/SMC1A/KNTC1/INCENP/ZW10/TTK/NUP43/RANGAP1/KIF2C/NUF2/NDC80/CENPA/HJURP/CENPF/NEK2/NDE1/CENPK/ERCC6L/DSN1/BUB1/CKAP5/AHCTF1	25
modulem1	GO:0005819	spindle	2.97782e-29	PLK1/SMC1A/RAD21/STAG2/MAPRE1/KNTC1/INCENP/ZW10/TTK/RANGAP1/TPX2/CDK1/RCC2/PRC1/KIF11/KIF4A/DLGAP5/ECT2/FBXO5/CENPF/NEK2/NDE1/KIF20B/KIF14/FAM83D/CKAP2/ASPM/AURKA/CKAP5	29
modulem1	GO:0000777	condensed chromosome kinetochore	6.02636e-29	ZWILCH/PLK1/SMC1A/KNTC1/INCENP/ZW10/NUP43/RANGAP1/KIF2C/NDC80/CENPA/HJURP/CENPF/NEK2/NDE1/CENPK/ERCC6L/DSN1/BUB1/CKAP5/AHCTF1	21
modulem1	GO:0000779	condensed chromosome, centromeric region	4.62155e-28	ZWILCH/PLK1/SMC1A/KNTC1/INCENP/ZW10/NUP43/RANGAP1/KIF2C/NDC80/CENPA/HJURP/CENPF/NEK2/NDE1/CENPK/ERCC6L/DSN1/BUB1/CKAP5/AHCTF1	21
modulem1	GO:0000922	spindle pole	1.28032e-21	PLK1/SMC1A/RAD21/STAG2/KNTC1/ZW10/TPX2/PRC1/KIF11/DLGAP5/CENPF/NEK2/NDE1/KIF20B/FAM83D/CKAP2/ASPM/AURKA/CKAP5	19
modulem1	GO:0005874	microtubule	7.41413e-16	PLK1/MAPRE1/KNTC1/INCENP/ZW10/TPX2/CDK1/RCC2/KIF2C/NUDC/PRC1/KIF11/KIF4A/NEK2/NDE1/KIF14/CKAP2/ASPM/AURKA/CKAP5	20
modulem1	GO:0072686	mitotic spindle	4.42841e-15	SMC1A/STAG2/MAPRE1/RANGAP1/TPX2/CDK1/RCC2/KIF11/ECT2/KIF20B/FAM83D/ASPM/AURKA	13
modulem1	GO:0030496	midbody	1.10562e-14	PLK1/INCENP/CDK1/RCC2/PRC1/KIF4A/CDCA8/ECT2/CENPF/NEK2/KIF20B/KIF14/ASPM/AURKA/ANLN	15
modulem1	GO:0005813	centrosome	1.62186e-12	PLK1/MAPRE1/PPP2R5A/DTL/STIL/MCM3/CDK1/NDC80/CDC45/DLGAP5/CENPF/HMMR/NEK2/NDE1/KIF20B/CKAP2/ASPM/AURKA/CKAP5	19
modulem1	GO:0005876	spindle microtubule	1.92065e-11	PLK1/MAPRE1/KNTC1/ZW10/CDK1/PRC1/KIF11/KIF4A/AURKA	9
modulem1	GO:0042555	MCM complex	3.55719e-11	MCM3/MCM5/MCM2/MCM7/MCM6/MCM8	6
modulem1	GO:0000794	condensed nuclear chromosome	1.47392e-08	PLK1/SMC1A/RAD21/INCENP/NDC80/CENPA/NEK2/BUB1	8
modulem1	GO:0097431	mitotic spindle pole	1.47392e-08	SMC1A/STAG2/KIF20B/FAM83D/ASPM/AURKA	6
modulem1	GO:0000778	condensed nuclear chromosome kinetochore	1.36751e-07	PLK1/NDC80/CENPA/BUB1	4
modulem1	GO:1990423	RZZ complex	9.03767e-07	ZWILCH/KNTC1/ZW10	3
modulem1	GO:0000940	condensed chromosome outer kinetochore	1.70249e-06	PLK1/NDC80/CENPF/BUB1	4
modulem1	GO:0000942	condensed nuclear chromosome outer kinetochore	3.2435e-06	PLK1/NDC80/BUB1	3
modulem1	GO:0044454	nuclear chromosome part	6.95523e-06	PLK1/ESCO2/INCENP/MCM3/MCM5/MCM2/MCM7/MCM6/CDK1/NDC80/CENPA/BUB1	12
modulem1	GO:0000780	condensed nuclear chromosome, centromeric region	6.95523e-06	PLK1/NDC80/CENPA/BUB1	4
modulem1	GO:0000796	condensin complex	2.44506e-05	SMC2/NCAPD2/NCAPH	3
modulem1	GO:1990752	microtubule end	3.8892e-05	MAPRE1/KIF2C/ASPM/CKAP5	4
modulem1	GO:0000781	chromosome, telomeric region	4.06091e-05	MCM3/MCM5/MCM2/MCM7/MCM6/CDK1/NSMCE2	7
modulem1	GO:0051233	spindle midzone	4.20069e-05	PLK1/RCC2/KIF20B/KIF14	4
modulem1	GO:0016363	nuclear matrix	4.79052e-05	SMC1A/RAD21/STAG2/KIF4A/CENPF/AHCTF1	6
modulem1	GO:0070938	contractile ring	4.79052e-05	PRC1/KIF20B/ANLN	3
modulem1	GO:0031080	nuclear pore outer ring	6.36763e-05	NUP160/NUP43/AHCTF1	3
modulem1	GO:0072687	meiotic spindle	6.36763e-05	FBXO5/ASPM/AURKA	3
modulem1	GO:0000784	nuclear chromosome, telomeric region	9.19679e-05	MCM3/MCM5/MCM2/MCM7/MCM6/CDK1	6
modulem1	GO:0008278	cohesin complex	0.000108769	SMC1A/RAD21/STAG2	3
modulem1	GO:0034399	nuclear periphery	0.000108851	SMC1A/RAD21/STAG2/KIF4A/CENPF/AHCTF1	6
modulem1	GO:0031616	spindle pole centrosome	0.000132671	DLGAP5/NDE1/AURKA	3
modulem1	GO:0010369	chromocenter	0.000163523	ESCO2/INCENP/CDCA8	3
modulem1	GO:0045120	pronucleus	0.000198112	CCNA2/CENPF/AURKA	3
modulem1	GO:0000785	chromatin	0.000308403	PLK1/RAD21/STAG2/ESCO2/INCENP/MCM2/MCM7/CENPA/CENPF/AHCTF1	10
modulem1	GO:0005635	nuclear envelope	0.000431765	XPO1/NUP160/SUN1/RRM1/NUP43/RANGAP1/DTL/CENPF/AHCTF1	9
modulem1	GO:0005721	pericentric heterochromatin	0.000451162	ESCO2/INCENP/CENPA	3
modulem1	GO:0031262	Ndc80 complex	0.000581016	NUF2/NDC80	2
modulem1	GO:0005643	nuclear pore	0.000622597	NUP160/NUP43/RANGAP1/AHCTF1	4
modulem1	GO:0005663	DNA replication factor C complex	0.000919681	RFC3/RFC4	2
modulem1	GO:0018995	host	0.00106682	XPO1/NUP160/KPNA2/NUP43	4
modulem1	GO:0043657	host cell	0.00106682	XPO1/NUP160/KPNA2/NUP43	4
modulem1	GO:0044215	other organism	0.00137712	XPO1/NUP160/KPNA2/NUP43	4
modulem1	GO:0044216	other organism cell	0.00137712	XPO1/NUP160/KPNA2/NUP43	4
modulem1	GO:0044217	other organism part	0.00137712	XPO1/NUP160/KPNA2/NUP43	4
modulem1	GO:0005828	kinetochore microtubule	0.00168053	KNTC1/ZW10	2
modulem1	GO:0031390	Ctf18 RFC-like complex	0.00214509	RFC3/RFC4	2
modulem1	GO:0043203	axon hillock	0.00214509	TPX2/AURKA	2
modulem1	GO:0031618	nuclear pericentric heterochromatin	0.00269639	ESCO2/CENPA	2
modulem1	GO:1990023	mitotic spindle midzone	0.00401784	RCC2/KIF20B	2
modulem1	GO:0044815	DNA packaging complex	0.00572147	SMC2/NCAPD2/NCAPH/CENPA	4
modulem1	GO:0005657	replication fork	0.00638476	RFC3/RFC4/MCM3	3
modulem1	GO:0032153	cell division site	0.0071962	ECT2/NDE1/ANLN	3
modulem1	GO:0032155	cell division site part	0.0071962	ECT2/NDE1/ANLN	3
modulem1	GO:0045171	intercellular bridge	0.00775091	TPX2/KIF4A/CDCA8	3
modulem1	GO:0035371	microtubule plus-end	0.00775091	KIF2C/CKAP5	2
modulem1	GO:0005881	cytoplasmic microtubule	0.0086941	MAPRE1/KIF2C/CKAP2	3
modulem1	GO:0000792	heterochromatin	0.0146682	ESCO2/INCENP/CENPA	3
modulem1	GO:0000797	condensin core heterodimer	0.0148527	NCAPD2	1
modulem1	GO:0034506	chromosome, centromeric core domain	0.0148527	RCC2	1
modulem1	GO:0044450	microtubule organizing center part	0.0209013	PLK1/STIL/AURKA/CKAP5	4
modulem1	GO:0000307	cyclin-dependent protein kinase holoenzyme complex	0.0229246	CDK1/CCNA2	2
modulem1	GO:0031965	nuclear membrane	0.0236254	XPO1/SUN1/RANGAP1/DTL/AHCTF1	5
modulem1	GO:0099568	cytoplasmic region	0.0245886	MAPRE1/RANGAP1/MELK/KIF4A/CENPF/ANLN	6
modulem1	GO:0000939	condensed chromosome inner kinetochore	0.0248357	CENPA	1
modulem1	GO:0005658	alpha DNA polymerase:primase complex	0.0248357	MCM3	1
modulem1	GO:0032116	SMC loading complex	0.0248357	NIPBL	1
modulem1	GO:0044614	nuclear pore cytoplasmic filaments	0.0248357	RANGAP1	1
modulem1	GO:0090694	Scc2-Scc4 cohesin loading complex	0.0248357	NIPBL	1
modulem1	GO:0097125	cyclin B1-CDK1 complex	0.0248357	CDK1	1
modulem1	GO:0097362	MCM8-MCM9 complex	0.0248357	MCM8	1
modulem1	GO:1990723	cytoplasmic periphery of the nuclear pore complex	0.0248357	RANGAP1	1
modulem1	GO:0005720	nuclear heterochromatin	0.025161	ESCO2/CENPA	2
modulem1	GO:0000795	synaptonemal complex	0.0259674	PLK1/INCENP	2
modulem1	GO:0099086	synaptonemal structure	0.0259674	PLK1/INCENP	2
modulem1	GO:0005826	actomyosin contractile ring	0.032364	ANLN	1
modulem1	GO:0030981	cortical microtubule cytoskeleton	0.032364	MAPRE1	1
modulem1	GO:0031391	Elg1 RFC-like complex	0.032364	RFC4	1
modulem1	GO:0042585	germinal vesicle	0.032364	AURKA	1
modulem1	GO:0070939	Dsl1/NZR complex	0.032364	ZW10	1
modulem1	GO:0097124	cyclin A2-CDK2 complex	0.032364	CCNA2	1
modulem1	GO:0097149	centralspindlin complex	0.032364	ECT2	1
modulem1	GO:1905721	mitotic spindle astral microtubule end	0.032364	MAPRE1	1
modulem1	GO:0005814	centriole	0.0404843	PLK1/STIL/AURKA	3
modulem1	GO:0000444	MIS12/MIND type complex	0.0411255	DSN1	1
modulem1	GO:0001674	female germ cell nucleus	0.0411255	AURKA	1
modulem1	GO:0032133	chromosome passenger complex	0.0411255	CDCA8	1
modulem1	GO:0033267	axon part	0.0429134	RANGAP1/TPX2/KIF4A/KIF20B/AURKA	5
modulem1	GO:0005642	annulate lamellae	0.0496256	XPO1	1
modulem1	GO:0031465	Cul4B-RING E3 ubiquitin ligase complex	0.0496256	DTL	1
modulem1	GO:1904115	axon cytoplasm	0.0519053	RANGAP1/KIF4A	2
modulem1	GO:0032154	cleavage furrow	0.053145	ECT2/NDE1	2
modulem1	GO:0000801	central element	0.0541298	INCENP	1
modulem1	GO:0001940	male pronucleus	0.0541298	CCNA2	1
modulem1	GO:0005639	integral component of nuclear inner membrane	0.0541298	SUN1	1
modulem1	GO:0030893	meiotic cohesin complex	0.0541298	SMC1A	1
modulem1	GO:0031229	intrinsic component of nuclear inner membrane	0.0541298	SUN1	1
modulem1	GO:0061673	mitotic spindle astral microtubule	0.0541298	MAPRE1	1
modulem1	GO:0098892	extrinsic component of postsynaptic specialization membrane	0.0541298	KPNA2	1
modulem1	GO:0030915	Smc5-Smc6 complex	0.0583932	NSMCE2	1
modulem1	GO:0034992	microtubule organizing center attachment site	0.0583932	SUN1	1
modulem1	GO:0034993	meiotic nuclear membrane microtubule tethering complex	0.0583932	SUN1	1
modulem1	GO:0036449	microtubule minus-end	0.0583932	ASPM	1
modulem1	GO:0044453	nuclear membrane part	0.0583932	SUN1	1
modulem1	GO:0106068	SUMO ligase complex	0.0583932	NSMCE2	1
modulem1	GO:0106083	nuclear membrane protein complex	0.0583932	SUN1	1
modulem1	GO:0106094	nuclear membrane microtubule tethering complex	0.0583932	SUN1	1
modulem1	GO:1902554	serine/threonine protein kinase complex	0.0618936	CDK1/CCNA2	2
modulem1	GO:0005664	nuclear origin of replication recognition complex	0.0642372	MCM2	1
modulem1	GO:0097539	ciliary transition fiber	0.0642372	CENPF	1
modulem1	GO:0098890	extrinsic component of postsynaptic membrane	0.0642372	KPNA2	1
modulem1	GO:0000808	origin recognition complex	0.0702497	MCM2	1
modulem1	GO:0001939	female pronucleus	0.0702497	CCNA2	1
modulem1	GO:0032059	bleb	0.0702497	ANLN	1
modulem1	GO:0000235	astral microtubule	0.0765708	MAPRE1	1
modulem1	GO:0005818	aster	0.0765708	MAPRE1	1
modulem1	GO:0032838	plasma membrane bounded cell projection cytoplasm	0.076575	RANGAP1/KIF4A/CENPF	3
modulem1	GO:0061695	transferase complex, transferring phosphorus-containing groups	0.076575	MCM3/CDK1/CCNA2	3
modulem1	GO:1902911	protein kinase complex	0.0766037	CDK1/CCNA2	2
modulem1	GO:0120111	neuron projection cytoplasm	0.0813848	RANGAP1/KIF4A	2
modulem1	GO:0030863	cortical cytoskeleton	0.082542	MAPRE1/ANLN	2
modulem2	GO:0005681	spliceosomal complex	2.86116e-31	SRRM1/U2AF2/USP39/PRPF3/SNRPA/PRPF8/SNRPC/SNRPA1/XAB2/SF3B3/SUGP1/SF3A2/CWC27/DHX38/HNRNPA3/SNRNP40/GPKOW/HNRNPU/HNRNPR/RBMX/HNRNPF/HNRNPK/DHX15/HNRNPH3	24
modulem2	GO:0071013	catalytic step 2 spliceosome	1.92848e-20	SRRM1/PRPF8/SNRPA1/XAB2/SF3B3/SF3A2/CWC27/DHX38/HNRNPA3/SNRNP40/HNRNPU/HNRNPR/RBMX/HNRNPF/HNRNPK	15
modulem2	GO:0016607	nuclear speck	1.92366e-19	SRRM1/U2AF2/PRPF3/PRPF8/SNRPA1/SRSF10/RBM10/SF3A2/RBM4/PABPN1/DDX46/RNPS1/PRPF40A/SNRNP40/PCBP1/HNRNPU/DHX15/ZC3H18/YTHDC1/THOC2/FYTTD1/ASCC3	22
modulem2	GO:0005684	U2-type spliceosomal complex	8.18445e-14	U2AF2/PRPF3/PRPF8/SNRPC/SNRPA1/XAB2/SF3B3/SF3A2/CWC27/SNRNP40/DHX15	11
modulem2	GO:0030532	small nuclear ribonucleoprotein complex	2.04872e-08	USP39/PRPF3/SNRPA/PRPF8/SNRPC/SNRPA1/SF3A2/SNRNP40	8
modulem2	GO:0120114	Sm-like protein family complex	4.15008e-08	USP39/PRPF3/SNRPA/PRPF8/SNRPC/SNRPA1/SF3A2/SNRNP40	8
modulem2	GO:0097525	spliceosomal snRNP complex	2.35045e-07	USP39/PRPF3/SNRPA/PRPF8/SNRPC/SF3A2/SNRNP40	7
modulem2	GO:0071005	U2-type precatalytic spliceosome	2.86494e-07	PRPF3/PRPF8/SNRPA1/SF3B3/SF3A2/CWC27	6
modulem2	GO:0071011	precatalytic spliceosome	2.86494e-07	PRPF3/PRPF8/SNRPA1/SF3B3/SF3A2/CWC27	6
modulem2	GO:0035770	ribonucleoprotein granule	3.02418e-07	HNRNPL/RBM4/DHX9/HNRNPA3/PCBP1/HNRNPU/ELAVL1/HNRNPK/IGF2BP1	9
modulem2	GO:0070937	CRD-mediated mRNA stability complex	1.16344e-05	DHX9/HNRNPU/IGF2BP1	3
modulem2	GO:0036464	cytoplasmic ribonucleoprotein granule	3.63892e-05	RBM4/DHX9/PCBP1/HNRNPU/ELAVL1/HNRNPK/IGF2BP1	7
modulem2	GO:0071007	U2-type catalytic step 2 spliceosome	4.27925e-05	PRPF8/SNRPA1/XAB2/SNRNP40	4
modulem2	GO:0071004	U2-type prespliceosome	0.000375446	U2AF2/SNRPC	2
modulem2	GO:0071010	prespliceosome	0.000375446	U2AF2/SNRPC	2
modulem2	GO:0010494	cytoplasmic stress granule	0.000404933	RBM4/ELAVL1/HNRNPK/IGF2BP1	4
modulem2	GO:0046540	U4/U6 x U5 tri-snRNP complex	0.00255404	USP39/PRPF3/PRPF8	3
modulem2	GO:0097526	spliceosomal tri-snRNP complex	0.00255404	USP39/PRPF3/PRPF8	3
modulem2	GO:0005845	mRNA cap binding complex	0.0060688	NCBP2/NCBP1	2
modulem2	GO:0005847	mRNA cleavage and polyadenylation specificity factor complex	0.0060688	NUDT21/CSTF2	2
modulem2	GO:0000346	transcription export complex	0.00650534	ZC3H11A/THOC2	2
modulem2	GO:0034518	RNA cap binding complex	0.00650534	NCBP2/NCBP1	2
modulem2	GO:0005849	mRNA cleavage factor complex	0.00724305	NUDT21/CSTF2	2
modulem2	GO:0015030	Cajal body	0.015129	PRPF3/SNRPC/DDX46	3
modulem2	GO:0005689	U12-type spliceosomal complex	0.0180212	SF3B3/DHX15	2
modulem2	GO:0000243	commitment complex	0.0180212	SNRPC	1
modulem2	GO:0005674	transcription factor TFIIF complex	0.0180212	GTF2F1	1
modulem2	GO:0070618	Grb2-Sos complex	0.0180212	KHDRBS1	1
modulem2	GO:0098577	inactive sex chromosome	0.0180212	HNRNPU	1
modulem2	GO:1990047	spindle matrix	0.0180212	ZNF207	1
modulem2	GO:0005685	U1 snRNP	0.021622	SNRPA/SNRPC	2
modulem2	GO:0016363	nuclear matrix	0.0299964	SRRM1/PRPF40A/HNRNPU	3
modulem2	GO:0071920	cleavage body	0.0317468	CSTF2	1
modulem2	GO:0089701	U2AF	0.0317468	U2AF2	1
modulem2	GO:0090575	RNA polymerase II transcription factor complex	0.0384826	GTF2F1/HNRNPU/HNRNPAB	3
modulem2	GO:0034399	nuclear periphery	0.0384826	SRRM1/PRPF40A/HNRNPU	3
modulem2	GO:0044530	supraspliceosomal complex	0.0384826	RBMX	1
modulem2	GO:0061574	ASAP complex	0.0384826	RNPS1	1
modulem2	GO:0071008	U2-type post-mRNA release spliceosomal complex	0.0384826	DHX15	1
modulem2	GO:0071014	post-mRNA release spliceosomal complex	0.0384826	DHX15	1
modulem2	GO:0099053	activating signal cointegrator 1 complex	0.0384826	ASCC3	1
modulem2	GO:1990498	mitotic spindle microtubule	0.0384826	HNRNPU	1
modulem2	GO:0044798	nuclear transcription factor complex	0.0475813	GTF2F1/HNRNPU/HNRNPAB	3
modulem2	GO:0005726	perichromatin fibrils	0.059654	DHX9	1
modulem2	GO:0097165	nuclear stress granule	0.059654	DHX9	1
modulem2	GO:0000347	THO complex	0.065627	THOC2	1
modulem2	GO:0000445	THO complex part of transcription export complex	0.065627	THOC2	1
modulem2	GO:0000974	Prp19 complex	0.065627	U2AF2	1
modulem2	GO:1990124	messenger ribonucleoprotein complex	0.065627	HNRNPA3	1
modulem2	GO:0042382	paraspeckles	0.0749033	NUDT21	1
modulem2	GO:0070821	tertiary granule membrane	0.0825391	STOM/ATP6AP2	2
modulem2	GO:0070578	RISC-loading complex	0.0922794	DHX9	1
modulem2	GO:0005682	U5 snRNP	0.0985641	SNRNP40	1
modulem2	GO:0005686	U2 snRNP	0.0985641	SF3A2	1
modulem2	GO:1990023	mitotic spindle midzone	0.106265	HNRNPU	1
modulem2	GO:0042405	nuclear inclusion body	0.113658	PABPN1	1
modulem2	GO:0000777	condensed chromosome kinetochore	0.130945	HNRNPU/ZNF207	2
modulem3	GO:0030684	preribosome	0.000130331	PES1/NOP14/RIOK3	3
modulem3	GO:0030686	90S preribosome	0.0021262	PES1/NOP14	2
modulem3	GO:0030688	preribosome, small subunit precursor	0.0021262	NOP14/RIOK3	2
modulem3	GO:0044665	MLL1/2 complex	0.0122375	TEX10/SENP3	2
modulem3	GO:0071339	MLL1 complex	0.0122375	TEX10/SENP3	2
modulem3	GO:0030689	Noc complex	0.0122375	NOP14	1
modulem3	GO:0030692	Noc4p-Nop14p complex	0.0122375	NOP14	1
modulem3	GO:0044452	nucleolar part	0.0171146	PES1/HEATR1/POLR1E	3
modulem3	GO:0030687	preribosome, large subunit precursor	0.0171146	PES1	1
modulem3	GO:0032040	small-subunit processome	0.0171146	NOP14	1
modulem3	GO:0070545	PeBoW complex	0.0233137	PES1	1
modulem3	GO:0035097	histone methyltransferase complex	0.0284735	TEX10/SENP3	2
modulem3	GO:0031931	TORC1 complex	0.0435489	LARP1	1
modulem3	GO:0034708	methyltransferase complex	0.0435489	TEX10/SENP3	2
modulem3	GO:0000176	nuclear exosome (RNase complex)	0.0548533	EXOSC10	1
modulem3	GO:0031965	nuclear membrane	0.0548533	RRP12/WDR3/NOC4L	3
modulem3	GO:0031314	extrinsic component of mitochondrial inner membrane	0.0548533	NOA1	1
modulem3	GO:0038201	TOR complex	0.0564567	LARP1	1
modulem3	GO:0001650	fibrillar center	0.0673874	HEATR1/POLR1E	2
modulem3	GO:0005697	telomerase holoenzyme complex	0.0798673	GNL3L	1
modulem3	GO:0035327	transcriptionally active chromatin	0.0872719	EXOSC10	1
modulem4	GO:0098687	chromosomal region	6.44398e-29	ZWILCH/PLK1/SMC1A/RAD21/KNTC1/TTK/MCM3/MCM5/MCM2/MCM7/MCM6/CDK1/KIF2C/NUF2/NDC80/CDCA8/CENPA/HJURP/CENPF/NEK2/BUB1/WRN/POT1/XRCC6/NBN/HAT1/ORC2/ATR	28
modulem4	GO:0005819	spindle	2.22696e-20	PLK1/SMC1A/RAD21/KNTC1/TTK/TPX2/CDK1/PRC1/KIF11/KIF4A/DLGAP5/ECT2/FBXO5/CENPF/NEK2/KIF20B/KIF14/FAM83D/CKAP2/ASPM/AURKA/TOPBP1	22
modulem4	GO:0000793	condensed chromosome	7.88747e-19	ZWILCH/PLK1/SMC1A/RAD21/KNTC1/SMC2/NCAPD2/KIF2C/NCAPH/NDC80/CENPA/HJURP/CENPF/MKI67/NEK2/BUB1/TOPBP1/ORC2	18
modulem4	GO:0000922	spindle pole	8.4052e-18	PLK1/SMC1A/RAD21/KNTC1/TPX2/PRC1/KIF11/DLGAP5/CENPF/NEK2/KIF20B/FAM83D/CKAP2/ASPM/AURKA/TOPBP1	16
modulem4	GO:0000775	chromosome, centromeric region	1.65776e-16	ZWILCH/PLK1/SMC1A/RAD21/KNTC1/TTK/KIF2C/NUF2/NDC80/CDCA8/CENPA/HJURP/CENPF/NEK2/BUB1/ORC2	16
modulem4	GO:0000776	kinetochore	9.79502e-16	ZWILCH/PLK1/SMC1A/KNTC1/TTK/KIF2C/NUF2/NDC80/CENPA/HJURP/CENPF/NEK2/BUB1/ORC2	14
modulem4	GO:0000777	condensed chromosome kinetochore	4.23532e-14	ZWILCH/PLK1/SMC1A/KNTC1/KIF2C/NDC80/CENPA/HJURP/CENPF/NEK2/BUB1/ORC2	12
modulem4	GO:0000779	condensed chromosome, centromeric region	1.20628e-13	ZWILCH/PLK1/SMC1A/KNTC1/KIF2C/NDC80/CENPA/HJURP/CENPF/NEK2/BUB1/ORC2	12
modulem4	GO:0000781	chromosome, telomeric region	2.56263e-13	MCM3/MCM5/MCM2/MCM7/MCM6/CDK1/WRN/POT1/XRCC6/NBN/HAT1/ORC2/ATR	13
modulem4	GO:0000784	nuclear chromosome, telomeric region	3.11251e-13	MCM3/MCM5/MCM2/MCM7/MCM6/CDK1/POT1/XRCC6/NBN/HAT1/ORC2/ATR	12
modulem4	GO:0030496	midbody	6.94504e-13	PLK1/CDK1/PRC1/KIF4A/CDCA8/ECT2/CENPF/NEK2/KIF20B/KIF14/ASPM/AURKA/ANLN	13
modulem4	GO:0044454	nuclear chromosome part	7.74603e-13	PLK1/MCM3/MCM5/MCM2/MCM7/MCM6/CDK1/NDC80/CENPA/BUB1/POLD3/POT1/XRCC6/NBN/HAT1/ORC2/MSH6/ATR	18
modulem4	GO:0042555	MCM complex	1.06383e-11	MCM3/MCM5/MCM2/MCM7/MCM6/MCM8	6
modulem4	GO:0005813	centrosome	1.06383e-11	PLK1/DTL/STIL/MCM3/CDK1/NDC80/CDC45/DLGAP5/CENPF/HMMR/NEK2/KIF20B/CKAP2/ASPM/AURKA/WRN/ORC2	17
modulem4	GO:0072686	mitotic spindle	8.46652e-10	SMC1A/TPX2/CDK1/KIF11/ECT2/KIF20B/FAM83D/ASPM/AURKA	9
modulem4	GO:0000794	condensed nuclear chromosome	3.04573e-09	PLK1/SMC1A/RAD21/NDC80/CENPA/NEK2/BUB1/TOPBP1	8
modulem4	GO:0005874	microtubule	4.87646e-09	PLK1/KNTC1/TPX2/CDK1/KIF2C/PRC1/KIF11/KIF4A/NEK2/KIF14/CKAP2/ASPM/AURKA	13
modulem4	GO:0005876	spindle microtubule	7.9182e-09	PLK1/KNTC1/CDK1/PRC1/KIF11/KIF4A/AURKA	7
modulem4	GO:0000778	condensed nuclear chromosome kinetochore	4.7973e-08	PLK1/NDC80/CENPA/BUB1	4
modulem4	GO:0097431	mitotic spindle pole	2.83125e-07	SMC1A/KIF20B/FAM83D/ASPM/AURKA	5
modulem4	GO:0005657	replication fork	3.3532e-07	RFC3/RFC4/MCM3/WRN/POLD3/NBN	6
modulem4	GO:0000940	condensed chromosome outer kinetochore	5.77846e-07	PLK1/NDC80/CENPF/BUB1	4
modulem4	GO:0000942	condensed nuclear chromosome outer kinetochore	1.28888e-06	PLK1/NDC80/BUB1	3
modulem4	GO:0000780	condensed nuclear chromosome, centromeric region	2.51157e-06	PLK1/NDC80/CENPA/BUB1	4
modulem4	GO:0000796	condensin complex	1.02932e-05	SMC2/NCAPD2/NCAPH	3
modulem4	GO:0070938	contractile ring	2.36279e-05	PRC1/KIF20B/ANLN	3
modulem4	GO:0072687	meiotic spindle	3.24179e-05	FBXO5/ASPM/AURKA	3
modulem4	GO:0000939	condensed chromosome inner kinetochore	7.39747e-05	CENPA/ORC2	2
modulem4	GO:0045120	pronucleus	0.000112934	CCNA2/CENPF/AURKA	3
modulem4	GO:1990423	RZZ complex	0.000206634	ZWILCH/KNTC1	2
modulem4	GO:0016363	nuclear matrix	0.000223971	SMC1A/RAD21/KIF4A/CENPF/HAT1	5
modulem4	GO:0031262	Ndc80 complex	0.000386512	NUF2/NDC80	2
modulem4	GO:0000785	chromatin	0.000417188	PLK1/RAD21/MCM2/MCM7/CENPA/CENPF/HAT1/ORC2/MSH6	9
modulem4	GO:0034399	nuclear periphery	0.00046488	SMC1A/RAD21/KIF4A/CENPF/HAT1	5
modulem4	GO:0051233	spindle midzone	0.000571242	PLK1/KIF20B/KIF14	3
modulem4	GO:0005663	DNA replication factor C complex	0.000571242	RFC3/RFC4	2
modulem4	GO:0005664	nuclear origin of replication recognition complex	0.00146588	MCM2/ORC2	2
modulem4	GO:0031390	Ctf18 RFC-like complex	0.00146588	RFC3/RFC4	2
modulem4	GO:0043203	axon hillock	0.00146588	TPX2/AURKA	2
modulem4	GO:0000808	origin recognition complex	0.0018332	MCM2/ORC2	2
modulem4	GO:0032993	protein-DNA complex	0.00239639	MCM3/CENPA/POLD3/POT1/XRCC6	5
modulem4	GO:0044815	DNA packaging complex	0.00297441	SMC2/NCAPD2/NCAPH/CENPA	4
modulem4	GO:0008278	cohesin complex	0.00310406	SMC1A/RAD21	2
modulem4	GO:0000782	telomere cap complex	0.003421	POT1/XRCC6	2
modulem4	GO:0000783	nuclear telomere cap complex	0.003421	POT1/XRCC6	2
modulem4	GO:0031616	spindle pole centrosome	0.003421	DLGAP5/AURKA	2
modulem4	GO:0045171	intercellular bridge	0.00443233	TPX2/KIF4A/CDCA8	3
modulem4	GO:0043601	nuclear replisome	0.00635455	MCM3/POLD3	2
modulem4	GO:0043073	germ cell nucleus	0.00694064	AURKA/TOPBP1	2
modulem4	GO:0030894	replisome	0.00753959	MCM3/POLD3	2
modulem4	GO:0000797	condensin core heterodimer	0.0109405	NCAPD2	1
modulem4	GO:0043625	delta DNA polymerase complex	0.0109405	POLD3	1
modulem4	GO:1990752	microtubule end	0.011994	KIF2C/ASPM	2
modulem4	GO:0043596	nuclear replication fork	0.0126495	MCM3/POLD3	2
modulem4	GO:0061695	transferase complex, transferring phosphorus-containing groups	0.0126495	MCM3/CDK1/CCNA2/POLD3	4
modulem4	GO:0000307	cyclin-dependent protein kinase holoenzyme complex	0.0138328	CDK1/CCNA2	2
modulem4	GO:1990391	DNA repair complex	0.0138328	XRCC6/MSH6	2
modulem4	GO:0016605	PML body	0.0156013	NBN/TOPBP1/ATR	3
modulem4	GO:0005658	alpha DNA polymerase:primase complex	0.0183184	MCM3	1
modulem4	GO:0032301	MutSalpha complex	0.0183184	MSH6	1
modulem4	GO:0097125	cyclin B1-CDK1 complex	0.0183184	CDK1	1
modulem4	GO:0097362	MCM8-MCM9 complex	0.0183184	MCM8	1
modulem4	GO:0005814	centriole	0.024293	PLK1/STIL/AURKA	3
modulem4	GO:0005826	actomyosin contractile ring	0.024293	ANLN	1
modulem4	GO:0031391	Elg1 RFC-like complex	0.024293	RFC4	1
modulem4	GO:0032300	mismatch repair complex	0.024293	MSH6	1
modulem4	GO:0042585	germinal vesicle	0.024293	AURKA	1
modulem4	GO:0043564	Ku70:Ku80 complex	0.024293	XRCC6	1
modulem4	GO:0097124	cyclin A2-CDK2 complex	0.024293	CCNA2	1
modulem4	GO:0097149	centralspindlin complex	0.024293	ECT2	1
modulem4	GO:0001674	female germ cell nucleus	0.0314336	AURKA	1
modulem4	GO:0032133	chromosome passenger complex	0.0314336	CDCA8	1
modulem4	GO:0031465	Cul4B-RING E3 ubiquitin ligase complex	0.0386744	DTL	1
modulem4	GO:0032153	cell division site	0.0386744	ECT2/ANLN	2
modulem4	GO:0032155	cell division site part	0.0386744	ECT2/ANLN	2
modulem4	GO:0001940	male pronucleus	0.0435439	CCNA2	1
modulem4	GO:0030893	meiotic cohesin complex	0.0435439	SMC1A	1
modulem4	GO:0005881	cytoplasmic microtubule	0.0435439	KIF2C/CKAP2	2
modulem4	GO:1902554	serine/threonine protein kinase complex	0.046894	CDK1/CCNA2	2
modulem4	GO:0044450	microtubule organizing center part	0.046894	PLK1/STIL/AURKA	3
modulem4	GO:0005828	kinetochore microtubule	0.046894	KNTC1	1
modulem4	GO:0030870	Mre11 complex	0.046894	NBN	1
modulem4	GO:0036449	microtubule minus-end	0.046894	ASPM	1
modulem4	GO:0070187	shelterin complex	0.046894	POT1	1
modulem4	GO:0097539	ciliary transition fiber	0.0528665	CENPF	1
modulem4	GO:0000792	heterochromatin	0.0557498	CENPA/ORC2	2
modulem4	GO:0001939	female pronucleus	0.0557498	CCNA2	1
modulem4	GO:0031618	nuclear pericentric heterochromatin	0.0557498	CENPA	1
modulem4	GO:0032059	bleb	0.0557498	ANLN	1
modulem4	GO:0070419	nonhomologous end joining complex	0.0557498	XRCC6	1
modulem4	GO:1902911	protein kinase complex	0.0557498	CDK1/CCNA2	2
modulem4	GO:1990023	mitotic spindle midzone	0.0667962	KIF20B	1
modulem4	GO:0033267	axon part	0.0694283	TPX2/KIF4A/KIF20B/AURKA	4
modulem4	GO:0031464	Cul4A-RING E3 ubiquitin ligase complex	0.0704397	DTL	1
modulem4	GO:0042405	nuclear inclusion body	0.0704397	NBN	1
modulem4	GO:0042575	DNA polymerase complex	0.0753782	POLD3	1
modulem5	GO:0000151	ubiquitin ligase complex	2.19634e-10	UBE2D1/WWP1/UBE4A/SMURF2/USP47/LMO7/FBXL4/FBXW11/CCNF/CUL2	10
modulem5	GO:0019005	SCF ubiquitin ligase complex	0.000949273	USP47/FBXW11/CCNF	3
modulem5	GO:0031461	cullin-RING ubiquitin ligase complex	0.00130467	USP47/FBXW11/CCNF/CUL2	4
modulem5	GO:0030891	VCB complex	0.0793692	CUL2	1
modulem5	GO:0000153	cytoplasmic ubiquitin ligase complex	0.120427	CUL2	1
modulem5	GO:0031462	Cul2-RING ubiquitin ligase complex	0.120427	CUL2	1
modulem5	GO:0099078	BORC complex	0.120427	KXD1	1
modulem5	GO:0005769	early endosome	0.133425	MGRN1/DTX3L/ARRDC4	3
modulem5	GO:0005765	lysosomal membrane	0.133425	KXD1/UBA1/DTX3L	3
modulem5	GO:0098852	lytic vacuole membrane	0.133425	KXD1/UBA1/DTX3L	3
modulem5	GO:0031083	BLOC-1 complex	0.133425	KXD1	1
modulem5	GO:0005774	vacuolar membrane	0.139519	KXD1/UBA1/DTX3L	3
modulem5	GO:0016607	nuclear speck	0.139519	TRIP12/SMURF2/FBXL4	3
modulem5	GO:0031082	BLOC complex	0.141669	KXD1	1
modulem5	GO:0030867	rough endoplasmic reticulum membrane	0.159516	UBA1	1
modulem5	GO:0030057	desmosome	0.162274	UBA1	1
modulem6	GO:0005798	Golgi-associated vesicle	8.48786e-16	TMED2/VMA21/SEC24A/SEC31A/SEC24D/SEC24B/COPG1/COPB1/COPA/COPB2/ARCN1/ARF1	12
modulem6	GO:0030660	Golgi-associated vesicle membrane	8.48786e-16	TMED2/VMA21/SEC24A/SEC31A/SEC24D/SEC24B/COPG1/COPB1/COPA/COPB2/ARCN1	11
modulem6	GO:0030120	vesicle coat	3.54759e-15	SEC24A/SEC31A/SEC24D/SEC24B/COPG1/COPB1/COPA/COPB2/ARCN1	9
modulem6	GO:0030662	coated vesicle membrane	1.2782e-13	TMED2/VMA21/SEC24A/SEC31A/SEC24D/SEC24B/COPG1/COPB1/COPA/COPB2/ARCN1	11
modulem6	GO:0030135	coated vesicle	2.79064e-13	TMED2/VMA21/SEC24A/SEC31A/SEC24D/SEC24B/COPG1/COPB1/COPA/COPB2/ARCN1/ARF1	12
modulem6	GO:0030137	COPI-coated vesicle	2.79064e-13	TMED2/COPG1/COPB1/COPA/COPB2/ARCN1/ARF1	7
modulem6	GO:0030117	membrane coat	3.49044e-13	SEC24A/SEC31A/SEC24D/SEC24B/COPG1/COPB1/COPA/COPB2/ARCN1	9
modulem6	GO:0048475	coated membrane	3.49044e-13	SEC24A/SEC31A/SEC24D/SEC24B/COPG1/COPB1/COPA/COPB2/ARCN1	9
modulem6	GO:0030663	COPI-coated vesicle membrane	5.00387e-12	TMED2/COPG1/COPB1/COPA/COPB2/ARCN1	6
modulem6	GO:0030133	transport vesicle	1.45487e-10	TMED2/VMA21/SEC24A/SEC31A/SEC24D/SEC24B/COPG1/COPB1/COPA/COPB2/ARCN1	11
modulem6	GO:0030126	COPI vesicle coat	1.90212e-10	COPG1/COPB1/COPA/COPB2/ARCN1	5
modulem6	GO:0012507	ER to Golgi transport vesicle membrane	5.59754e-09	TMED2/VMA21/SEC24A/SEC31A/SEC24D/SEC24B	6
modulem6	GO:0030134	COPII-coated ER to Golgi transport vesicle	2.09981e-08	TMED2/VMA21/SEC24A/SEC31A/SEC24D/SEC24B	6
modulem6	GO:0030127	COPII vesicle coat	3.70164e-08	SEC24A/SEC31A/SEC24D/SEC24B	4
modulem6	GO:0005875	microtubule associated complex	4.82843e-06	KIF3A/KIF3B/DCTN1/KIF1B/KLC2	5
modulem6	GO:0030658	transport vesicle membrane	6.94434e-06	TMED2/VMA21/SEC24A/SEC31A/SEC24D/SEC24B	6
modulem6	GO:0005802	trans-Golgi network	7.95819e-06	GOLPH3/ARFIP1/ARFGEF1/GBF1/COG5/ARF1	6
modulem6	GO:0005871	kinesin complex	7.95819e-06	KIF3A/KIF3B/KLC2	3
modulem6	GO:0033267	axon part	1.5952e-05	KIF20B/SPTBN1/KIF3A/KIF3B/KIF21B/KIF1B/KIF13B	7
modulem6	GO:0070971	endoplasmic reticulum exit site	1.81438e-05	TFG/SEC31A/SEC16A	3
modulem6	GO:0016939	kinesin II complex	5.65873e-05	KIF3A/KIF3B	2
modulem6	GO:0005793	endoplasmic reticulum-Golgi intermediate compartment	0.000289468	TMED2/VMA21/COPB1/GBF1	4
modulem6	GO:0097542	ciliary tip	0.000386063	IFT80/KIF3A/KIF3B	3
modulem6	GO:1904115	axon cytoplasm	0.000639749	KIF3A/KIF3B/KIF1B	3
modulem6	GO:0120111	neuron projection cytoplasm	0.0019717	KIF3A/KIF3B/KIF1B	3
modulem6	GO:0099568	cytoplasmic region	0.00327788	SPTBN1/KIF3A/KIF3B/DCTN1/KIF1B	5
modulem6	GO:0005795	Golgi stack	0.00653649	TMED2/GOLPH3/GBF1	3
modulem6	GO:0016938	kinesin I complex	0.00826603	KLC2	1
modulem6	GO:0005819	spindle	0.0112953	KIF20B/KIF3A/KIF3B/DCTN1	4
modulem6	GO:0005874	microtubule	0.0151357	KIF3A/KIF3B/DCTN1/KLC2	4
modulem6	GO:0005876	spindle microtubule	0.016144	KIF3A/KIF3B	2
modulem6	GO:0032838	plasma membrane bounded cell projection cytoplasm	0.016144	KIF3A/KIF3B/KIF1B	3
modulem6	GO:0099023	tethering complex	0.0168303	RINT1/COG5	2
modulem6	GO:0005873	plus-end kinesin complex	0.0198045	KIF3B	1
modulem6	GO:0070939	Dsl1/NZR complex	0.0198045	RINT1	1
modulem6	GO:0044304	main axon	0.0209071	SPTBN1/KIF13B	2
modulem6	GO:0044441	ciliary part	0.0209071	IFT80/KIF3A/KIF3B/DCTN1	4
modulem6	GO:0033116	endoplasmic reticulum-Golgi intermediate compartment membrane	0.0233799	TMED2/VMA21	2
modulem6	GO:0032580	Golgi cisterna membrane	0.0240575	TMED2/GOLPH3	2
modulem6	GO:0005813	centrosome	0.030431	KIF20B/KIF3A/KIF3B/DCTN1	4
modulem6	GO:0032588	trans-Golgi network membrane	0.031509	ARFIP1/COG5	2
modulem6	GO:0031985	Golgi cisterna	0.0365366	TMED2/GOLPH3	2
modulem6	GO:0005869	dynactin complex	0.0374846	DCTN1	1
modulem6	GO:0008091	spectrin	0.0409005	SPTBN1	1
modulem6	GO:0032437	cuticular plate	0.0409005	SPTBN1	1
modulem6	GO:0014731	spectrin-associated cytoskeleton	0.0431004	SPTBN1	1
modulem6	GO:0070938	contractile ring	0.0431004	KIF20B	1
modulem6	GO:0120103	centriolar subdistal appendage	0.0431004	DCTN1	1
modulem6	GO:0017119	Golgi transport complex	0.0494948	COG5	1
modulem6	GO:0042589	zymogen granule membrane	0.0494948	TMED2	1
modulem6	GO:1990023	mitotic spindle midzone	0.0494948	KIF20B	1
modulem6	GO:0005814	centriole	0.0508492	KIF3A/DCTN1	2
modulem6	GO:0033270	paranode region of axon	0.0515771	KIF13B	1
modulem6	GO:0044448	cell cortex part	0.0515771	SPTBN1/DCTN1	2
modulem6	GO:0005777	peroxisome	0.0515771	GBF1/ARF1	2
modulem6	GO:0042579	microbody	0.0515771	GBF1/ARF1	2
modulem6	GO:0042588	zymogen granule	0.0562182	TMED2	1
modulem6	GO:0030673	axolemma	0.0591447	SPTBN1	1
modulem6	GO:0030992	intraciliary transport particle B	0.0609327	IFT80	1
modulem6	GO:0035371	microtubule plus-end	0.0609327	DCTN1	1
modulem6	GO:0000922	spindle pole	0.06303	KIF20B/DCTN1	2
modulem6	GO:0031252	cell leading edge	0.06303	SPTBN1/GBF1/ARF1	3
modulem6	GO:0030426	growth cone	0.0704096	KIF20B/KIF21B	2
modulem6	GO:0031430	M band	0.0704096	SPTBN1	1
modulem6	GO:0030427	site of polarized growth	0.0704096	KIF20B/KIF21B	2
modulem6	GO:0044450	microtubule organizing center part	0.0704096	KIF3A/DCTN1	2
modulem6	GO:0030904	retromer complex	0.0704096	DCTN1	1
modulem6	GO:0030496	midbody	0.0704096	KIF20B/KIF3B	2
modulem6	GO:0030017	sarcomere	0.0716184	SPTBN1/ARF1	2
modulem6	GO:0030990	intraciliary transport particle	0.0746307	IFT80	1
modulem6	GO:0097431	mitotic spindle pole	0.0808716	KIF20B	1
modulem6	GO:1990752	microtubule end	0.0808716	DCTN1	1
modulem6	GO:0044449	contractile fiber part	0.0808716	SPTBN1/ARF1	2
modulem6	GO:0051233	spindle midzone	0.0824307	KIF20B	1
modulem6	GO:0030016	myofibril	0.0824307	SPTBN1/ARF1	2
modulem7	GO:0044391	ribosomal subunit	5.76785e-12	MRPS9/MRPS10/MRPL11/RPLP0/RPL5/RPL27/RPS12/RPLP1/MRPL3/EIF4G1	10
modulem7	GO:0005840	ribosome	1.24843e-10	MRPS9/MRPS10/MRPL11/RPLP0/RPL5/RPL27/RPS12/RPLP1/MRPL3/EIF4G1	10
modulem7	GO:0016281	eukaryotic translation initiation factor 4F complex	1.42242e-08	EIF4G1/EIF4E/EIF4H/EIF4B	4
modulem7	GO:0016282	eukaryotic 43S preinitiation complex	6.25163e-08	EIF3G/EIF3E/EIF3I/EIF3D	4
modulem7	GO:0033290	eukaryotic 48S preinitiation complex	6.25163e-08	EIF3G/EIF3E/EIF3I/EIF3D	4
modulem7	GO:0005852	eukaryotic translation initiation factor 3 complex	6.25163e-08	EIF3G/EIF3E/EIF3I/EIF3D	4
modulem7	GO:0070993	translation preinitiation complex	6.25163e-08	EIF3G/EIF3E/EIF3I/EIF3D	4
modulem7	GO:0022626	cytosolic ribosome	6.25163e-08	RPLP0/RPL5/RPL27/RPS12/RPLP1/EIF4G1	6
modulem7	GO:0015934	large ribosomal subunit	1.20606e-07	MRPL11/RPLP0/RPL5/RPL27/RPLP1/MRPL3	6
modulem7	GO:0044445	cytosolic part	1.91673e-07	RPLP0/RPL5/RPL27/RPS12/RPLP1/EIF4G1/EIF4E	7
modulem7	GO:0022625	cytosolic large ribosomal subunit	7.94519e-06	RPLP0/RPL5/RPL27/RPLP1	4
modulem7	GO:0015935	small ribosomal subunit	2.02782e-05	MRPS9/MRPS10/RPS12/EIF4G1	4
modulem7	GO:0000313	organellar ribosome	4.29338e-05	MRPS9/MRPS10/MRPL11/MRPL3	4
modulem7	GO:0005761	mitochondrial ribosome	4.29338e-05	MRPS9/MRPS10/MRPL11/MRPL3	4
modulem7	GO:0005850	eukaryotic translation initiation factor 2 complex	6.27211e-05	EIF2A/EIF2S3	2
modulem7	GO:0071541	eukaryotic translation initiation factor 3 complex, eIF3m	9.79038e-05	EIF3I/EIF3D	2
modulem7	GO:0098798	mitochondrial protein complex	0.00185749	MRPS9/MRPS10/MRPL11/MRPL3	4
modulem7	GO:0000314	organellar small ribosomal subunit	0.00283093	MRPS9/MRPS10	2
modulem7	GO:0005763	mitochondrial small ribosomal subunit	0.00283093	MRPS9/MRPS10	2
modulem7	GO:0071540	eukaryotic translation initiation factor 3 complex, eIF3e	0.00505943	EIF3E	1
modulem7	GO:0022627	cytosolic small ribosomal subunit	0.0053429	RPS12/EIF4G1	2
modulem7	GO:0000315	organellar large ribosomal subunit	0.00912783	MRPL11/MRPL3	2
modulem7	GO:0005762	mitochondrial large ribosomal subunit	0.00912783	MRPL11/MRPL3	2
modulem7	GO:0005925	focal adhesion	0.00912783	RPLP0/RPL5/RPL27/RPLP1	4
modulem7	GO:0005924	cell-substrate adherens junction	0.00912783	RPLP0/RPL5/RPL27/RPLP1	4
modulem7	GO:0030055	cell-substrate junction	0.00917561	RPLP0/RPL5/RPL27/RPLP1	4
modulem7	GO:0005743	mitochondrial inner membrane	0.0122865	MRPS9/MRPS10/MRPL11/MRPL3	4
modulem7	GO:0005759	mitochondrial matrix	0.0122865	MRPS9/MRPS10/MRPL11/MRPL3	4
modulem7	GO:0019866	organelle inner membrane	0.0161071	MRPS9/MRPS10/MRPL11/MRPL3	4
modulem7	GO:0005912	adherens junction	0.0162701	RPLP0/RPL5/RPL27/RPLP1	4
modulem7	GO:0098556	cytoplasmic side of rough endoplasmic reticulum membrane	0.0162701	RPL27	1
modulem7	GO:0016442	RISC complex	0.0314014	EIF4E	1
modulem7	GO:0031332	RNAi effector complex	0.0334688	EIF4E	1
modulem7	GO:0005845	mRNA cap binding complex	0.0354101	EIF4E	1
modulem7	GO:0033391	chromatoid body	0.0362018	EIF4E	1
modulem7	GO:0034518	RNA cap binding complex	0.0362018	EIF4E	1
modulem7	GO:0098554	cytoplasmic side of endoplasmic reticulum membrane	0.0405794	RPL27	1
modulem7	GO:0005786	signal recognition particle, endoplasmic reticulum targeting	0.042113	SRP54	1
modulem7	GO:0099524	postsynaptic cytosol	0.043564	EIF4E	1
modulem7	GO:0048500	signal recognition particle	0.0473986	SRP54	1
modulem7	GO:0036464	cytoplasmic ribonucleoprotein granule	0.0496552	RPLP0/EIF4E	2
modulem7	GO:0030867	rough endoplasmic reticulum membrane	0.0534073	RPL27	1
modulem7	GO:0035770	ribonucleoprotein granule	0.0534073	RPLP0/EIF4E	2
modulem7	GO:0099522	region of cytosol	0.054219	EIF4E	1
modulem8	GO:0005813	centrosome	1.18042e-15	MAPRE1/HMMR/NEK2/NDE1/AURKA/CKAP5/RAB8A/IQCB1/CEP97/SASS6/DYNC1I2/CCP110/CNTRL/AKAP9/TMEM67/AHI1	16
modulem8	GO:0005874	microtubule	5.85844e-13	MAPRE1/TPX2/NEK2/NDE1/AURKA/CKAP5/TUBB4B/TUBB/TUBB2A/TUBB2B/DYNC1I2/TUBA4A/TUBA1C	13
modulem8	GO:0044450	microtubule organizing center part	1.4872e-08	AURKA/CKAP5/RAB8A/IQCB1/CEP104/SASS6/CCP110/AHI1	8
modulem8	GO:0005814	centriole	4.49611e-08	AURKA/RAB8A/IQCB1/CEP104/SASS6/CCP110/AHI1	7
modulem8	GO:0005819	spindle	1.47776e-06	MAPRE1/TPX2/NEK2/NDE1/AURKA/CKAP5/IQCB1/CEP104	8
modulem8	GO:0000922	spindle pole	4.27051e-06	TPX2/NEK2/NDE1/AURKA/CKAP5/CEP104	6
modulem8	GO:0030496	midbody	0.000182835	NEK2/AURKA/TACC1/RAB8A/CNTRL	5
modulem8	GO:0072686	mitotic spindle	0.000351713	MAPRE1/TPX2/AURKA/IQCB1	4
modulem8	GO:0044441	ciliary part	0.000916305	RAB8A/IQCB1/CNTRL/TMEM67/ARL13B/AHI1	6
modulem8	GO:0043203	axon hillock	0.00101263	TPX2/AURKA	2
modulem8	GO:0035869	ciliary transition zone	0.00178808	IQCB1/TMEM67/AHI1	3
modulem8	GO:0031616	spindle pole centrosome	0.00215834	NDE1/AURKA	2
modulem8	GO:0036038	MKS complex	0.00215834	TMEM67/AHI1	2
modulem8	GO:0000777	condensed chromosome kinetochore	0.00603249	NEK2/NDE1/CKAP5	3
modulem8	GO:0000779	condensed chromosome, centromeric region	0.00720596	NEK2/NDE1/CKAP5	3
modulem8	GO:1990752	microtubule end	0.00720596	MAPRE1/CKAP5	2
modulem8	GO:0097730	non-motile cilium	0.00926623	RAB8A/IQCB1/AHI1	3
modulem8	GO:0005912	adherens junction	0.00970934	MAPRE1/MAPRE2/YWHAE/YWHAG/AHI1	5
modulem8	GO:0000776	kinetochore	0.00970934	NEK2/NDE1/CKAP5	3
modulem8	GO:0005876	spindle microtubule	0.0218932	MAPRE1/AURKA	2
modulem8	GO:0000775	chromosome, centromeric region	0.0218932	NEK2/NDE1/CKAP5	3
modulem8	GO:0005925	focal adhesion	0.0218932	MAPRE1/MAPRE2/YWHAE/YWHAG	4
modulem8	GO:0045171	intercellular bridge	0.0218932	TPX2/IQCB1	2
modulem8	GO:0005924	cell-substrate adherens junction	0.0218932	MAPRE1/MAPRE2/YWHAE/YWHAG	4
modulem8	GO:0000793	condensed chromosome	0.0218932	NEK2/NDE1/CKAP5	3
modulem8	GO:0030055	cell-substrate junction	0.0218932	MAPRE1/MAPRE2/YWHAE/YWHAG	4
modulem8	GO:0030981	cortical microtubule cytoskeleton	0.0218932	MAPRE1	1
modulem8	GO:0042585	germinal vesicle	0.0218932	AURKA	1
modulem8	GO:0044307	dendritic branch	0.0218932	AKAP9	1
modulem8	GO:1905721	mitotic spindle astral microtubule end	0.0218932	MAPRE1	1
modulem8	GO:0001674	female germ cell nucleus	0.0282258	AURKA	1
modulem8	GO:0043025	neuronal cell body	0.0289103	TPX2/AURKA/RAB8A/AKAP9	4
modulem8	GO:0090724	central region of growth cone	0.0312241	YWHAE	1
modulem8	GO:0098536	deuterosome	0.0312241	SASS6	1
modulem8	GO:0099147	extrinsic component of postsynaptic density membrane	0.0312241	AKAP9	1
modulem8	GO:0060170	ciliary membrane	0.0330353	TMEM67/ARL13B	2
modulem8	GO:0061673	mitotic spindle astral microtubule	0.0344822	MAPRE1	1
modulem8	GO:0098892	extrinsic component of postsynaptic specialization membrane	0.0344822	AKAP9	1
modulem8	GO:0035578	azurophil granule lumen	0.0347562	TUBB4B/TUBB	2
modulem8	GO:0098890	extrinsic component of postsynaptic membrane	0.0436051	AKAP9	1
modulem8	GO:0005641	nuclear envelope lumen	0.046009	TUBB	1
modulem8	GO:0120103	centriolar subdistal appendage	0.046009	CNTRL	1
modulem8	GO:0036064	ciliary basal body	0.046009	RAB8A/AHI1	2
modulem8	GO:0031253	cell projection membrane	0.0463116	MAPRE1/TMEM67/ARL13B	3
modulem8	GO:0000235	astral microtubule	0.0463116	MAPRE1	1
modulem8	GO:0005818	aster	0.0463116	MAPRE1	1
modulem8	GO:0072687	meiotic spindle	0.0463116	AURKA	1
modulem8	GO:0098687	chromosomal region	0.052153	NEK2/NDE1/CKAP5	3
modulem8	GO:0005871	kinesin complex	0.052153	YWHAE	1
modulem8	GO:0099243	extrinsic component of synaptic membrane	0.052153	AKAP9	1
modulem8	GO:0098978	glutamatergic synapse	0.0538744	RAB8A/YWHAE/AKAP9	3
modulem8	GO:0033391	chromatoid body	0.0538744	TDRD7	1
modulem8	GO:0033267	axon part	0.0538744	TPX2/AURKA/YWHAE	3
modulem8	GO:0045120	pronucleus	0.0602126	AURKA	1
modulem8	GO:0035371	microtubule plus-end	0.0630068	CKAP5	1
modulem8	GO:0090723	growth cone part	0.0636509	YWHAE	1
modulem8	GO:0005766	primary lysosome	0.0636509	TUBB4B/TUBB	2
modulem8	GO:0042582	azurophil granule	0.0636509	TUBB4B/TUBB	2
modulem8	GO:0000930	gamma-tubulin complex	0.0659678	CKAP5	1
modulem8	GO:0043073	germ cell nucleus	0.0684156	AURKA	1
modulem8	GO:0005775	vacuolar lumen	0.0724715	TUBB4B/TUBB	2
modulem8	GO:0036464	cytoplasmic ribonucleoprotein granule	0.0751491	TUBB/TDRD7	2
modulem8	GO:0035770	ribonucleoprotein granule	0.0833563	TUBB/TDRD7	2
modulem8	GO:0097431	mitotic spindle pole	0.0872639	AURKA	1
modulem8	GO:0090543	Flemming body	0.0923782	CNTRL	1
modulem8	GO:0097546	ciliary base	0.0941501	RAB8A	1
modulem9	GO:0005874	microtubule	3.18895e-14	MAPRE1/NEK2/NDE1/CKAP5/TUBB4B/TUBB/TUBB2A/TUBB2B/DYNC1I2/TUBA4A/TUBA1C/MACF1/TUBB3/INVS	14
modulem9	GO:0005813	centrosome	7.8499e-13	MAPRE1/NEK2/NDE1/CKAP5/RAB8A/IQCB1/CEP97/SASS6/DYNC1I2/CCP110/CNTRL/AKAP9/TMEM67/AHI1	14
modulem9	GO:0044450	microtubule organizing center part	1.59177e-08	CKAP5/RAB8A/IQCB1/CEP104/SASS6/CCP110/AHI1/CCDC68	8
modulem9	GO:0005814	centriole	4.81224e-08	RAB8A/IQCB1/CEP104/SASS6/CCP110/AHI1/CCDC68	7
modulem9	GO:0044441	ciliary part	1.00263e-05	RAB8A/IQCB1/CNTRL/TMEM67/ARL13B/AHI1/CCDC68/WDPCP	8
modulem9	GO:0005819	spindle	2.44373e-05	MAPRE1/NEK2/NDE1/CKAP5/IQCB1/CEP104/INVS	7
modulem9	GO:0120103	centriolar subdistal appendage	0.00198858	CNTRL/CCDC68	2
modulem9	GO:0000922	spindle pole	0.00217398	NEK2/NDE1/CKAP5/CEP104	4
modulem9	GO:0035869	ciliary transition zone	0.00233909	IQCB1/TMEM67/AHI1	3
modulem9	GO:0036038	MKS complex	0.00300312	TMEM67/AHI1	2
modulem9	GO:0000777	condensed chromosome kinetochore	0.00821755	NEK2/NDE1/CKAP5	3
modulem9	GO:0000779	condensed chromosome, centromeric region	0.00949246	NEK2/NDE1/CKAP5	3
modulem9	GO:1990752	microtubule end	0.00949246	MAPRE1/CKAP5	2
modulem9	GO:0097730	non-motile cilium	0.012043	RAB8A/IQCB1/AHI1	3
modulem9	GO:0005912	adherens junction	0.0123405	MAPRE1/MAPRE2/YWHAE/YWHAG/AHI1	5
modulem9	GO:0000776	kinetochore	0.0123405	NEK2/NDE1/CKAP5	3
modulem9	GO:0097541	axonemal basal plate	0.0138067	WDPCP	1
modulem9	GO:0031253	cell projection membrane	0.0153148	MAPRE1/TMEM67/ARL13B/MACF1	4
modulem9	GO:0030496	midbody	0.0221868	NEK2/RAB8A/CNTRL	3
modulem9	GO:0000775	chromosome, centromeric region	0.0260361	NEK2/NDE1/CKAP5	3
modulem9	GO:0005925	focal adhesion	0.0260361	MAPRE1/MAPRE2/YWHAE/YWHAG	4
modulem9	GO:0005924	cell-substrate adherens junction	0.0260361	MAPRE1/MAPRE2/YWHAE/YWHAG	4
modulem9	GO:0000793	condensed chromosome	0.0260361	NEK2/NDE1/CKAP5	3
modulem9	GO:0030055	cell-substrate junction	0.0260361	MAPRE1/MAPRE2/YWHAE/YWHAG	4
modulem9	GO:0030981	cortical microtubule cytoskeleton	0.0260361	MAPRE1	1
modulem9	GO:0044307	dendritic branch	0.0260361	AKAP9	1
modulem9	GO:1905721	mitotic spindle astral microtubule end	0.0260361	MAPRE1	1
modulem9	GO:0005853	eukaryotic translation elongation factor 1 complex	0.0334473	EEF1A2	1
modulem9	GO:0090724	central region of growth cone	0.0365526	YWHAE	1
modulem9	GO:0098536	deuterosome	0.0365526	SASS6	1
modulem9	GO:0098574	cytoplasmic side of lysosomal membrane	0.0365526	EEF1A2	1
modulem9	GO:0099147	extrinsic component of postsynaptic density membrane	0.0365526	AKAP9	1
modulem9	GO:0060170	ciliary membrane	0.0385725	TMEM67/ARL13B	2
modulem9	GO:0061673	mitotic spindle astral microtubule	0.0400702	MAPRE1	1
modulem9	GO:0098892	extrinsic component of postsynaptic specialization membrane	0.0400702	AKAP9	1
modulem9	GO:0035578	azurophil granule lumen	0.0403	TUBB4B/TUBB	2
modulem9	GO:0072686	mitotic spindle	0.0442994	MAPRE1/IQCB1	2
modulem9	GO:0005930	axoneme	0.045391	ARL13B/WDPCP	2
modulem9	GO:0097014	ciliary plasm	0.045391	ARL13B/WDPCP	2
modulem9	GO:0098890	extrinsic component of postsynaptic membrane	0.0466711	AKAP9	1
modulem9	GO:0005641	nuclear envelope lumen	0.0504164	TUBB	1
modulem9	GO:0036064	ciliary basal body	0.0504164	RAB8A/AHI1	2
modulem9	GO:0000235	astral microtubule	0.0529475	MAPRE1	1
modulem9	GO:0005818	aster	0.0529475	MAPRE1	1
modulem9	GO:0098687	chromosomal region	0.059383	NEK2/NDE1/CKAP5	3
modulem9	GO:0005871	kinesin complex	0.059383	YWHAE	1
modulem9	GO:0099243	extrinsic component of synaptic membrane	0.059383	AKAP9	1
modulem9	GO:0098978	glutamatergic synapse	0.0616547	RAB8A/YWHAE/AKAP9	3
modulem9	GO:0031616	spindle pole centrosome	0.0616547	NDE1	1
modulem9	GO:0035371	microtubule plus-end	0.0741807	CKAP5	1
modulem9	GO:0090723	growth cone part	0.0745534	YWHAE	1
modulem9	GO:0005766	primary lysosome	0.0745534	TUBB4B/TUBB	2
modulem9	GO:0042582	azurophil granule	0.0745534	TUBB4B/TUBB	2
modulem9	GO:0000930	gamma-tubulin complex	0.0770902	CKAP5	1
modulem9	GO:0099568	cytoplasmic region	0.0770902	MAPRE1/ARL13B/WDPCP	3
modulem9	GO:0030426	growth cone	0.0800305	YWHAE/TUBB3	2
modulem9	GO:0030427	site of polarized growth	0.0812455	YWHAE/TUBB3	2
modulem9	GO:0005775	vacuolar lumen	0.0815793	TUBB4B/TUBB	2
modulem9	GO:0032838	plasma membrane bounded cell projection cytoplasm	0.0889381	ARL13B/WDPCP	2
modulem9	GO:0043025	neuronal cell body	0.0959903	RAB8A/AKAP9/EEF1A2	3
modulem9	GO:0090543	Flemming body	0.105357	CNTRL	1
modulem9	GO:0097546	ciliary base	0.107271	RAB8A	1
GO: Gene Ontology
