# Supplementary material for: Exploring the mechanism of resistance to sorafenib in two hepatocellular carcinoma cell lines
Source: Aging (Albany NY). 2020 Nov 21;12(23):24255–69. doi: 10.18632/aging.104195 (PMC7762478; doi:10.18632/aging.104195)
Supplement: Supplementary Table 4 [file aging-12-104195-s005.xlsx]

## Sheet: Sheet1
Supplementary Table 4. Molecular functions enriched in sorafenib-resistant cells.
module	ID	Description	p.adjust	geneID	Count
modulem1	GO:0008017	microtubule binding	8.01515e-06	PLK1/MAPRE1/RCC2/KIF2C/PRC1/NDE1/KIF20B/KIF14/FAM83D	9
modulem1	GO:0004386	helicase activity	9.03857e-05	MCM3/MCM5/MCM2/MCM7/MCM6/MCM8/ERCC6L	7
modulem1	GO:0015631	tubulin binding	9.03857e-05	PLK1/MAPRE1/RCC2/KIF2C/PRC1/NDE1/KIF20B/KIF14/FAM83D	9
modulem1	GO:0008094	DNA-dependent ATPase activity	0.00061892	RFC3/RFC4/MCM7/MCM6/ERCC6L	5
modulem1	GO:0016887	ATPase activity	0.00103915	RFC3/RFC4/MCM7/MCM6/KIF20B/KIF14/ERCC6L/ATAD2	8
modulem1	GO:0042623	ATPase activity, coupled	0.00130456	RFC3/RFC4/MCM7/MCM6/KIF20B/KIF14/ERCC6L	7
modulem1	GO:0019237	centromeric DNA binding	0.00334915	ZW10/KIF2C	2
modulem1	GO:0036033	mediator complex binding	0.00334915	SMC1A/NIPBL	2
modulem1	GO:0003689	DNA clamp loader activity	0.005085	RFC3/RFC4	2
modulem1	GO:0008574	ATP-dependent microtubule motor activity, plus-end-directed	0.005085	KIF20B/KIF14	2
modulem1	GO:0033170	protein-DNA loading ATPase activity	0.005085	RFC3/RFC4	2
modulem1	GO:0003688	DNA replication origin binding	0.00572005	MCM5/MCM2	2
modulem1	GO:0010997	anaphase-promoting complex binding	0.00572005	PLK1/FBXO5	2
modulem1	GO:0003697	single-stranded DNA binding	0.00707981	SMC2/MCM7/MCM6/NEIL3	4
modulem1	GO:0043142	single-stranded DNA-dependent ATPase activity	0.0108267	RFC3/RFC4	2
modulem1	GO:1990939	ATP-dependent microtubule motor activity	0.0108267	KIF20B/KIF14	2
modulem1	GO:0004674	protein serine/threonine kinase activity	0.0113401	PLK1/TTK/CDK1/MELK/NEK2/BUB1/AURKA	7
modulem1	GO:0051010	microtubule plus-end binding	0.0113401	MAPRE1/KIF2C	2
modulem1	GO:0097472	cyclin-dependent protein kinase activity	0.0143772	CDK1/CCNA2	2
modulem1	GO:0140142	nucleocytoplasmic carrier activity	0.0319641	XPO1/KPNA2	2
modulem1	GO:0140097	catalytic activity, acting on DNA	0.0319641	MCM7/MCM6/NEIL3/ERCC6L	4
modulem1	GO:0008536	Ran GTPase binding	0.0430115	XPO1/RANGAP1	2
modulem1	GO:0004003	ATP-dependent DNA helicase activity	0.0430115	MCM7/MCM6	2
modulem1	GO:0004748	ribonucleoside-diphosphate reductase activity, thioredoxin disulfide as acceptor	0.0430115	RRM1	1
modulem1	GO:0016728	oxidoreductase activity, acting on CH or CH2 groups, disulfide as acceptor	0.0430115	RRM1	1
modulem1	GO:0032406	MutLbeta complex binding	0.0430115	MCM8	1
modulem1	GO:0032408	MutSbeta complex binding	0.0430115	MCM8	1
modulem1	GO:0061731	ribonucleoside-diphosphate reductase activity	0.0430115	RRM1	1
modulem1	GO:0008022	protein C-terminus binding	0.0465925	MAPRE1/NIPBL/CENPF/MKI67	4
modulem1	GO:0045296	cadherin binding	0.0497172	MAPRE1/RANGAP1/NUDC/ANLN/CKAP5	5
modulem1	GO:0140104	molecular carrier activity	0.0497172	XPO1/KPNA2	2
modulem1	GO:0004712	protein serine/threonine/tyrosine kinase activity	0.0571533	TTK/AURKA	2
modulem1	GO:0019894	kinesin binding	0.0571533	PRC1/FAM83D	2
modulem1	GO:0003678	DNA helicase activity	0.0608771	MCM7/MCM6	2
modulem1	GO:0003777	microtubule motor activity	0.0618422	KIF20B/KIF14	2
modulem1	GO:0015616	DNA translocase activity	0.0666077	ERCC6L	1
modulem1	GO:1990948	ubiquitin ligase inhibitor activity	0.0793928	FBXO5	1
modulem1	GO:0008026	ATP-dependent helicase activity	0.0793928	MCM7/MCM6	2
modulem1	GO:0070035	purine NTP-dependent helicase activity	0.0793928	MCM7/MCM6	2
modulem1	GO:0004468	lysine N-acetyltransferase activity, acting on acetyl phosphate as donor	0.081381	ESCO2	1
modulem1	GO:0008139	nuclear localization sequence binding	0.081381	KPNA2	1
modulem1	GO:0043515	kinetochore binding	0.081381	TTK	1
modulem1	GO:0055105	ubiquitin-protein transferase inhibitor activity	0.081381	FBXO5	1
modulem1	GO:0070087	chromo shadow domain binding	0.081381	NIPBL	1
modulem1	GO:0032407	MutSalpha complex binding	0.0906138	MCM8	1
modulem1	GO:0061676	importin-alpha family protein binding	0.0906138	TPX2	1
modulem1	GO:0004721	phosphoprotein phosphatase activity	0.0943092	PPP2R5A/CDKN3/DLGAP5	3
modulem1	GO:0000405	bubble DNA binding	0.0943092	NEIL3	1
modulem1	GO:0005049	nuclear export signal receptor activity	0.0943092	XPO1	1
modulem1	GO:0016725	oxidoreductase activity, acting on CH or CH2 groups	0.0943092	RRM1	1
modulem1	GO:0019888	protein phosphatase regulator activity	0.0943092	PPP2R5A/PPP2R5E	2
modulem1	GO:0140078	class I DNA-(apurinic or apyrimidinic site) endonuclease activity	0.11207	NEIL3	1
modulem1	GO:0042393	histone binding	0.11207	MCM2/NCAPD2/HJURP	3
modulem1	GO:0019208	phosphatase regulator activity	0.115927	PPP2R5A/PPP2R5E	2
modulem1	GO:0003682	chromatin binding	0.115927	SMC1A/MCM8/CDK1/CENPA/CENPF	5
modulem1	GO:0032404	mismatch repair complex binding	0.115927	MCM8	1
modulem2	GO:0003729	mRNA binding	7.94783e-09	NCBP2/NUDT21/SNRPC/HNRNPA0/RBM4/DHX9/RNPS1/PCBP1/HNRNPU/ELAVL1/HNRNPR/RBMX/HNRNPAB/IGF2BP1/FYTTD1	15
modulem2	GO:0003730	mRNA 3'-UTR binding	1.16764e-08	NUDT21/HNRNPA0/RBM4/RNPS1/HNRNPU/ELAVL1/HNRNPR/IGF2BP1	8
modulem2	GO:0003727	single-stranded RNA binding	0.000278644	SNRPC/DHX9/HNRNPU/HNRNPF/KHDRBS1	5
modulem2	GO:0061980	regulatory RNA binding	0.000397354	RBM10/RBM4/DHX9/ELAVL1	4
modulem2	GO:0003697	single-stranded DNA binding	0.000659964	DHX9/PCBP1/HNRNPU/WBP11/HNRNPK	5
modulem2	GO:0036002	pre-mRNA binding	0.00120706	U2AF2/HNRNPL/RBM4/HNRNPU	4
modulem2	GO:0043140	ATP-dependent 3'-5' DNA helicase activity	0.00140371	DHX9/ASCC3	2
modulem2	GO:0003725	double-stranded RNA binding	0.00140371	DHX9/HNRNPU/ELAVL1/DHX15	4
modulem2	GO:0070063	RNA polymerase binding	0.00140371	PABPN1/DHX9/HNRNPU/STOM	4
modulem2	GO:0017091	AU-rich element binding	0.00140371	NUDT21/HNRNPA0/ELAVL1	3
modulem2	GO:0035925	mRNA 3'-UTR AU-rich region binding	0.00140371	NUDT21/HNRNPA0/ELAVL1	3
modulem2	GO:0097157	pre-mRNA intronic binding	0.00211983	HNRNPL/RBM4	2
modulem2	GO:1990446	U1 snRNP binding	0.00211983	SNRPA/SNRPC	2
modulem2	GO:0035198	miRNA binding	0.00211983	RBM10/RBM4/ELAVL1	3
modulem2	GO:0043138	3'-5' DNA helicase activity	0.002616	DHX9/ASCC3	2
modulem2	GO:0017069	snRNA binding	0.00289937	SNRPA/NCBP2/HNRNPU	3
modulem2	GO:0000340	RNA 7-methylguanosine cap binding	0.00289937	NCBP2/NCBP1	2
modulem2	GO:0070990	snRNP binding	0.00289937	SNRPA/SNRPC	2
modulem2	GO:1990841	promoter-specific chromatin binding	0.00505989	GTF2F1/DHX9/HNRNPU	3
modulem2	GO:0043021	ribonucleoprotein complex binding	0.0050643	SNRPA/SNRPC/DHX9/HNRNPU	4
modulem2	GO:0000339	RNA cap binding	0.00795599	NCBP2/NCBP1	2
modulem2	GO:0008143	poly(A) binding	0.00856523	HNRNPU/KHDRBS1	2
modulem2	GO:0004386	helicase activity	0.00856523	DDX46/DHX9/DHX15/ASCC3	4
modulem2	GO:0070717	poly-purine tract binding	0.0157854	HNRNPU/KHDRBS1	2
modulem2	GO:0008187	poly-pyrimidine tract binding	0.0159342	HNRNPU/KHDRBS1	2
modulem2	GO:0017130	poly(C) RNA binding	0.0159342	HNRNPU	1
modulem2	GO:0033679	3'-5' DNA/RNA helicase activity	0.0159342	DHX9	1
modulem2	GO:0033681	ATP-dependent 3'-5' DNA/RNA helicase activity	0.0159342	DHX9	1
modulem2	GO:0034459	ATP-dependent 3'-5' RNA helicase activity	0.0159342	DHX9	1
modulem2	GO:0097158	pre-mRNA intronic pyrimidine-rich binding	0.0159342	RBM4	1
modulem2	GO:1990518	single-stranded DNA-dependent ATP-dependent 3'-5' DNA helicase activity	0.0159342	DHX9	1
modulem2	GO:0004003	ATP-dependent DNA helicase activity	0.0255674	DHX9/ASCC3	2
modulem2	GO:0003724	RNA helicase activity	0.0266494	DHX9/DHX15	2
modulem2	GO:0001069	regulatory region RNA binding	0.0266494	DHX9	1
modulem2	GO:0001097	TFIIH-class transcription factor complex binding	0.0266494	HNRNPU	1
modulem2	GO:0033680	ATP-dependent DNA/RNA helicase activity	0.0266494	DHX9	1
modulem2	GO:0045142	triplex DNA binding	0.0266494	DHX9	1
modulem2	GO:0000993	RNA polymerase II complex binding	0.0320915	DHX9/HNRNPU	2
modulem2	GO:0003678	DNA helicase activity	0.0320915	DHX9/ASCC3	2
modulem2	GO:0017116	single-stranded DNA-dependent ATP-dependent DNA helicase activity	0.0320915	DHX9	1
modulem2	GO:0030628	pre-mRNA 3'-splice site binding	0.0320915	U2AF2	1
modulem2	GO:0033677	DNA/RNA helicase activity	0.0320915	DHX9	1
modulem2	GO:0034458	3'-5' RNA helicase activity	0.0320915	DHX9	1
modulem2	GO:0051032	nucleic acid transmembrane transporter activity	0.0320915	HNRNPA3	1
modulem2	GO:0051033	RNA transmembrane transporter activity	0.0320915	HNRNPA3	1
modulem2	GO:1905172	RISC complex binding	0.0320915	DHX9	1
modulem2	GO:0043175	RNA polymerase core enzyme binding	0.0400921	DHX9/HNRNPU	2
modulem2	GO:0030619	U1 snRNA binding	0.0400921	SNRPA	1
modulem2	GO:0099122	RNA polymerase II C-terminal domain binding	0.0400921	HNRNPU	1
modulem2	GO:0008026	ATP-dependent helicase activity	0.0434151	DHX9/ASCC3	2
modulem2	GO:0070035	purine NTP-dependent helicase activity	0.0434151	DHX9/ASCC3	2
modulem2	GO:0001098	basal transcription machinery binding	0.053373	DHX9/HNRNPU	2
modulem2	GO:0001099	basal RNA polymerase II transcription machinery binding	0.053373	DHX9/HNRNPU	2
modulem2	GO:0050733	RS domain binding	0.053373	SRSF10	1
modulem2	GO:1905538	polysome binding	0.053373	DHX9	1
modulem2	GO:0000978	RNA polymerase II proximal promoter sequence-specific DNA binding	0.0579361	MYBL1/DHX9/HNRNPU/RBMX/HNRNPK	5
modulem2	GO:0034046	poly(G) binding	0.0579361	HNRNPU	1
modulem2	GO:0061676	importin-alpha family protein binding	0.0579361	DHX9	1
modulem2	GO:1990247	N6-methyladenosine-containing RNA binding	0.0579361	YTHDC1	1
modulem2	GO:0003682	chromatin binding	0.0580522	NUDT21/GTF2F1/DHX9/HNRNPU/RBMX	5
modulem2	GO:0003688	DNA replication origin binding	0.0636934	DHX9	1
modulem2	GO:0000987	proximal promoter sequence-specific DNA binding	0.0636934	MYBL1/DHX9/HNRNPU/RBMX/HNRNPK	5
modulem2	GO:0008094	DNA-dependent ATPase activity	0.0644733	DHX9/ASCC3	2
modulem2	GO:0035197	siRNA binding	0.0673556	DHX9	1
modulem2	GO:0047429	nucleoside-triphosphate diphosphatase activity	0.0673556	DHX9	1
modulem2	GO:0031490	chromatin DNA binding	0.0695877	DHX9/HNRNPU	2
modulem2	GO:0019211	phosphatase activator activity	0.079562	GTF2F1	1
modulem2	GO:0043142	single-stranded DNA-dependent ATPase activity	0.0841186	DHX9	1
modulem2	GO:1990825	sequence-specific mRNA binding	0.0841186	DHX9	1
modulem2	GO:0016251	RNA polymerase II general transcription initiation factor activity	0.0871653	GTF2F1	1
modulem2	GO:0035613	RNA stem-loop binding	0.0871653	DHX9	1
modulem2	GO:0098847	sequence-specific single stranded DNA binding	0.0871653	PCBP1	1
modulem3	GO:0048027	mRNA 5'-UTR binding	0.00197298	LARP1/RSL1D1/GNL3	3
modulem3	GO:0043021	ribonucleoprotein complex binding	0.0055441	PES1/NMD3/PRMT3/LARP1	4
modulem3	GO:0016423	tRNA (guanine) methyltransferase activity	0.0055441	TRMT11/FTSJ1	2
modulem3	GO:0004386	helicase activity	0.0055441	DDX50/DDX21/DDX47/DDX17	4
modulem3	GO:0140098	catalytic activity, acting on RNA	0.00784283	TRMT11/EXOSC10/FTSJ1/DDX21/DDX17	5
modulem3	GO:0030515	snoRNA binding	0.0154408	NOP14/DDX21	2
modulem3	GO:0008175	tRNA methyltransferase activity	0.0191083	TRMT11/FTSJ1	2
modulem3	GO:0008186	RNA-dependent ATPase activity	0.0193294	DDX21/DDX17	2
modulem3	GO:0001179	RNA polymerase I transcription factor binding	0.0193294	POLR1E	1
modulem3	GO:0009020	tRNA (guanosine-2'-O-)-methyltransferase activity	0.0193294	FTSJ1	1
modulem3	GO:0052666	tRNA (cytosine-2'-O-)-methyltransferase activity	0.0193294	FTSJ1	1
modulem3	GO:0003724	RNA helicase activity	0.022313	DDX21/DDX17	2
modulem3	GO:0008757	S-adenosylmethionine-dependent methyltransferase activity	0.0277922	PRMT3/TRMT11/FTSJ1	3
modulem3	GO:0004809	tRNA (guanine-N2-)-methyltransferase activity	0.0277922	TRMT11	1
modulem3	GO:0106050	tRNA 2'-O-methyltransferase activity	0.0277922	FTSJ1	1
modulem3	GO:0019843	rRNA binding	0.0277922	RPF2/DDX21	2
modulem3	GO:0008173	RNA methyltransferase activity	0.0299116	TRMT11/FTSJ1	2
modulem3	GO:0005525	GTP binding	0.0299116	NOA1/GNL3/GNL2/GNL3L	4
modulem3	GO:0032550	purine ribonucleoside binding	0.0299116	NOA1/GNL3/GNL2/GNL3L	4
modulem3	GO:0001883	purine nucleoside binding	0.0299116	NOA1/GNL3/GNL2/GNL3L	4
modulem3	GO:0032549	ribonucleoside binding	0.0299116	NOA1/GNL3/GNL2/GNL3L	4
modulem3	GO:0001882	nucleoside binding	0.0299116	NOA1/GNL3/GNL2/GNL3L	4
modulem3	GO:0019001	guanyl nucleotide binding	0.0299116	NOA1/GNL3/GNL2/GNL3L	4
modulem3	GO:0032561	guanyl ribonucleotide binding	0.0299116	NOA1/GNL3/GNL2/GNL3L	4
modulem3	GO:0051731	polynucleotide 5'-hydroxyl-kinase activity	0.0338996	NOL9	1
modulem3	GO:0008168	methyltransferase activity	0.0370034	PRMT3/TRMT11/FTSJ1	3
modulem3	GO:0003730	mRNA 3'-UTR binding	0.037169	LARP1/RSL1D1	2
modulem3	GO:0016741	transferase activity, transferring one-carbon groups	0.0394172	PRMT3/TRMT11/FTSJ1	3
modulem3	GO:0043023	ribosomal large subunit binding	0.0437325	NMD3	1
modulem3	GO:0008494	translation activator activity	0.0468615	LARP1	1
modulem3	GO:0097322	7SK snRNA binding	0.0468615	DDX21	1
modulem3	GO:0008170	N-methyltransferase activity	0.0468615	PRMT3/TRMT11	2
modulem3	GO:0000340	RNA 7-methylguanosine cap binding	0.0468615	LARP1	1
modulem3	GO:0003688	DNA replication origin binding	0.0468615	GRWD1	1
modulem3	GO:0008190	eukaryotic initiation factor 4E binding	0.0468615	LARP1	1
modulem3	GO:0016427	tRNA (cytosine) methyltransferase activity	0.0468615	FTSJ1	1
modulem3	GO:0140101	catalytic activity, acting on a tRNA	0.0550351	TRMT11/FTSJ1	2
modulem3	GO:0009982	pseudouridine synthase activity	0.0550351	PUS7	1
modulem3	GO:0008097	5S rRNA binding	0.0550351	RPF2	1
modulem3	GO:0016273	arginine N-methyltransferase activity	0.0550351	PRMT3	1
modulem3	GO:0016274	protein-arginine N-methyltransferase activity	0.0550351	PRMT3	1
modulem3	GO:0089720	caspase binding	0.0550351	RIOK3	1
modulem3	GO:0043024	ribosomal small subunit binding	0.0585732	LARP1	1
modulem3	GO:0000339	RNA cap binding	0.0666256	LARP1	1
modulem3	GO:0008171	O-methyltransferase activity	0.0908613	FTSJ1	1
modulem3	GO:0016866	intramolecular transferase activity	0.0908613	PUS7	1
modulem3	GO:0070034	telomerase RNA binding	0.0908613	EXOSC10	1
modulem3	GO:0090079	translation regulator activity, nucleic acid binding	0.0908613	LARP1	1
modulem4	GO:0004386	helicase activity	1.1595e-08	MCM3/MCM5/MCM2/MCM7/MCM6/MCM8/WRN/RECQL/XRCC6/NBN	10
modulem4	GO:0008094	DNA-dependent ATPase activity	3.02784e-08	RFC3/RFC4/MCM7/MCM6/WRN/RECQL/XRCC6/NBN	8
modulem4	GO:0016887	ATPase activity	4.62228e-08	RFC3/RFC4/MCM7/MCM6/KIF20B/KIF14/ATAD2/WRN/RECQL/XRCC6/NBN/MSH6	12
modulem4	GO:0004003	ATP-dependent DNA helicase activity	8.26395e-08	MCM7/MCM6/WRN/RECQL/XRCC6/NBN	6
modulem4	GO:0042623	ATPase activity, coupled	3.79421e-07	RFC3/RFC4/MCM7/MCM6/KIF20B/KIF14/WRN/RECQL/XRCC6/NBN	10
modulem4	GO:0003678	DNA helicase activity	3.79421e-07	MCM7/MCM6/WRN/RECQL/XRCC6/NBN	6
modulem4	GO:0008026	ATP-dependent helicase activity	1.07083e-06	MCM7/MCM6/WRN/RECQL/XRCC6/NBN	6
modulem4	GO:0070035	purine NTP-dependent helicase activity	1.07083e-06	MCM7/MCM6/WRN/RECQL/XRCC6/NBN	6
modulem4	GO:0032404	mismatch repair complex binding	1.2832e-06	MCM8/WRN/MSH6/ATR	4
modulem4	GO:0032405	MutLalpha complex binding	1.87847e-05	WRN/MSH6/ATR	3
modulem4	GO:0140097	catalytic activity, acting on DNA	3.26978e-05	MCM7/MCM6/WRN/POLD3/RECQL/XRCC6/NBN	7
modulem4	GO:0010997	anaphase-promoting complex binding	4.02309e-05	PLK1/FBXO5/CLSPN	3
modulem4	GO:0032357	oxidized purine DNA binding	4.02309e-05	WRN/POT1/MSH6	3
modulem4	GO:0003684	damaged DNA binding	4.37777e-05	WRN/POT1/XRCC6/NBN/MSH6	5
modulem4	GO:0032356	oxidized DNA binding	5.21524e-05	WRN/POT1/MSH6	3
modulem4	GO:1905773	8-hydroxy-2'-deoxyguanosine DNA binding	0.00046201	WRN/POT1	2
modulem4	GO:0008017	microtubule binding	0.00046201	PLK1/KIF2C/PRC1/KIF20B/KIF14/FAM83D	6
modulem4	GO:0061821	telomeric D-loop binding	0.000776845	WRN/POT1	2
modulem4	GO:0062037	D-loop DNA binding	0.000776845	WRN/POT1	2
modulem4	GO:0000217	DNA secondary structure binding	0.000785737	WRN/POT1/MSH6	3
modulem4	GO:0004674	protein serine/threonine kinase activity	0.000785737	PLK1/TTK/CDK1/MELK/NEK2/BUB1/AURKA/ATR	8
modulem4	GO:0003689	DNA clamp loader activity	0.00199721	RFC3/RFC4	2
modulem4	GO:0008574	ATP-dependent microtubule motor activity, plus-end-directed	0.00199721	KIF20B/KIF14	2
modulem4	GO:0032407	MutSalpha complex binding	0.00199721	MCM8/ATR	2
modulem4	GO:0033170	protein-DNA loading ATPase activity	0.00199721	RFC3/RFC4	2
modulem4	GO:0042162	telomeric DNA binding	0.00199721	WRN/POT1/XRCC6	3
modulem4	GO:0003688	DNA replication origin binding	0.00252518	MCM5/MCM2	2
modulem4	GO:0003697	single-stranded DNA binding	0.00252684	SMC2/MCM7/MCM6/POT1	4
modulem4	GO:0015631	tubulin binding	0.00262558	PLK1/KIF2C/PRC1/KIF20B/KIF14/FAM83D	6
modulem4	GO:0043142	single-stranded DNA-dependent ATPase activity	0.00513154	RFC3/RFC4	2
modulem4	GO:1990939	ATP-dependent microtubule motor activity	0.00513154	KIF20B/KIF14	2
modulem4	GO:0097472	cyclin-dependent protein kinase activity	0.00784844	CDK1/CCNA2	2
modulem4	GO:0003682	chromatin binding	0.00802381	SMC1A/MCM8/CDK1/CENPA/CENPF/WRN/MSH6	7
modulem4	GO:0000400	four-way junction DNA binding	0.00842054	WRN/MSH6	2
modulem4	GO:0070337	3'-flap-structured DNA binding	0.017658	WRN	1
modulem4	GO:1990955	G-rich single-stranded DNA binding	0.017658	POT1	1
modulem4	GO:0042393	histone binding	0.0215585	MCM2/NCAPD2/HJURP/MSH6	4
modulem4	GO:0030332	cyclin binding	0.0230192	CDK1/XRCC6	2
modulem4	GO:0008022	protein C-terminus binding	0.0258414	CENPF/MKI67/XRCC6/TOPBP1	4
modulem4	GO:0004748	ribonucleoside-diphosphate reductase activity, thioredoxin disulfide as acceptor	0.025896	RRM1	1
modulem4	GO:0009378	four-way junction helicase activity	0.025896	WRN	1
modulem4	GO:0016728	oxidoreductase activity, acting on CH or CH2 groups, disulfide as acceptor	0.025896	RRM1	1
modulem4	GO:0032143	single thymine insertion binding	0.025896	MSH6	1
modulem4	GO:0032406	MutLbeta complex binding	0.025896	MCM8	1
modulem4	GO:0032408	MutSbeta complex binding	0.025896	MCM8	1
modulem4	GO:0061731	ribonucleoside-diphosphate reductase activity	0.025896	RRM1	1
modulem4	GO:0061749	forked DNA-dependent helicase activity	0.025896	WRN	1
modulem4	GO:0061849	telomeric G-quadruplex DNA binding	0.025896	WRN	1
modulem4	GO:0070336	flap-structured DNA binding	0.025896	WRN	1
modulem4	GO:0004712	protein serine/threonine/tyrosine kinase activity	0.0343319	TTK/AURKA	2
modulem4	GO:0019894	kinesin binding	0.0343319	PRC1/FAM83D	2
modulem4	GO:0010521	telomerase inhibitor activity	0.0351788	POT1	1
modulem4	GO:0032137	guanine/thymine mispair binding	0.0351788	MSH6	1
modulem4	GO:0032142	single guanine insertion binding	0.0351788	MSH6	1
modulem4	GO:0003777	microtubule motor activity	0.0365765	KIF20B/KIF14	2
modulem4	GO:0000403	Y-form DNA binding	0.0443501	WRN	1
modulem4	GO:0032138	single base insertion or deletion binding	0.0443501	MSH6	1
modulem4	GO:0019237	centromeric DNA binding	0.0517018	KIF2C	1
modulem4	GO:0036033	mediator complex binding	0.0517018	SMC1A	1
modulem4	GO:0051575	5'-deoxyribose-5-phosphate lyase activity	0.0517018	XRCC6	1
modulem4	GO:1990948	ubiquitin ligase inhibitor activity	0.0517018	FBXO5	1
modulem4	GO:0032135	DNA insertion or deletion binding	0.0590192	MSH6	1
modulem4	GO:0043515	kinetochore binding	0.0590192	TTK	1
modulem4	GO:0055105	ubiquitin-protein transferase inhibitor activity	0.0590192	FBXO5	1
modulem4	GO:0036310	annealing helicase activity	0.0656452	RECQL	1
modulem4	GO:0043138	3'-5' DNA helicase activity	0.0656452	WRN	1
modulem4	GO:0061676	importin-alpha family protein binding	0.0656452	TPX2	1
modulem4	GO:0000405	bubble DNA binding	0.0696778	WRN	1
modulem4	GO:0003691	double-stranded telomeric DNA binding	0.0696778	XRCC6	1
modulem4	GO:0016725	oxidoreductase activity, acting on CH or CH2 groups	0.0696778	RRM1	1
modulem4	GO:0017151	DEAD/H-box RNA helicase binding	0.0696778	POT1	1
modulem4	GO:0051880	G-quadruplex DNA binding	0.0696778	WRN	1
modulem4	GO:0030983	mismatched DNA binding	0.08329	MSH6	1
modulem4	GO:0097617	annealing activity	0.08329	RECQL	1
modulem4	GO:0098505	G-rich strand telomeric DNA binding	0.08329	POT1	1
modulem4	GO:0043047	single-stranded telomeric DNA binding	0.0902386	POT1	1
modulem4	GO:0000287	magnesium ion binding	0.1022	PLK1/WRN/MSH6	3
modulem5	GO:0019787	ubiquitin-like protein transferase activity	7.57848e-22	UBE2D1/WWP1/PJA2/RLIM/RNF6/TRIP12/SMURF2/UBE2M/LMO7/UBE2E3/UFL1/SH3RF1/MGRN1/UBE2G1/HECTD1/HUWE1/FBXW11/DTX3L	18
modulem5	GO:0004842	ubiquitin-protein transferase activity	7.07196e-21	UBE2D1/WWP1/PJA2/RLIM/RNF6/TRIP12/SMURF2/UBE2M/LMO7/UBE2E3/SH3RF1/MGRN1/UBE2G1/HECTD1/HUWE1/FBXW11/DTX3L	17
modulem5	GO:0061630	ubiquitin protein ligase activity	7.39824e-05	RLIM/RNF6/SMURF2/SH3RF1/MGRN1	5
modulem5	GO:0061659	ubiquitin-like protein ligase activity	7.39824e-05	RLIM/RNF6/SMURF2/SH3RF1/MGRN1	5
modulem5	GO:0061631	ubiquitin conjugating enzyme activity	0.00650492	UBE2D1/UBE2G1	2
modulem5	GO:0061650	ubiquitin-like protein conjugating enzyme activity	0.00651589	UBE2D1/UBE2G1	2
modulem5	GO:0071568	UFM1 transferase activity	0.0255534	UFL1	1
modulem5	GO:0004839	ubiquitin activating enzyme activity	0.0335092	UBA1	1
modulem5	GO:0071987	WD40-repeat domain binding	0.0479461	USP47	1
modulem5	GO:0019788	NEDD8 transferase activity	0.0479461	UBE2M	1
modulem5	GO:1990756	protein binding, bridging involved in substrate recognition for ubiquitination	0.0479461	ARRDC4	1
modulem5	GO:0005078	MAP-kinase scaffold activity	0.0479461	SH3RF1	1
modulem5	GO:0097677	STAT family protein binding	0.0479461	DTX3L	1
modulem5	GO:0044389	ubiquitin-like protein ligase binding	0.052608	UBE2G1/DTX3L/CUL2	3
modulem5	GO:0008641	ubiquitin-like modifier activating enzyme activity	0.0592048	UBA1	1
modulem5	GO:0034236	protein kinase A catalytic subunit binding	0.0719652	PJA2	1
modulem5	GO:0005159	insulin-like growth factor receptor binding	0.0780145	SOCS1	1
modulem5	GO:0035257	nuclear hormone receptor binding	0.0789702	RNF6/TRIP12	2
modulem5	GO:0034237	protein kinase A regulatory subunit binding	0.0789702	PJA2	1
modulem5	GO:0005160	transforming growth factor beta receptor binding	0.0880279	SMURF2	1
modulem5	GO:0051427	hormone receptor binding	0.0895366	RNF6/TRIP12	2
modulem5	GO:0046966	thyroid hormone receptor binding	0.107371	TRIP12	1
modulem6	GO:0003777	microtubule motor activity	6.56107e-11	KIF20B/KIF3A/KIF3B/KIF1B/KLC2/KIF13B/KIF16B	7
modulem6	GO:0003774	motor activity	3.19278e-10	KIF20B/KIF3A/KIF3B/DCTN1/KIF1B/KLC2/KIF13B/KIF16B	8
modulem6	GO:0008574	ATP-dependent microtubule motor activity, plus-end-directed	6.88284e-09	KIF20B/KIF3A/KIF3B/KIF16B	4
modulem6	GO:1990939	ATP-dependent microtubule motor activity	7.25437e-08	KIF20B/KIF3A/KIF3B/KIF16B	4
modulem6	GO:0051020	GTPase binding	0.0013101	SPTBN1/KIF3A/KIF3B/ARFGEF1/GBF1/KIF16B	6
modulem6	GO:1901981	phosphatidylinositol phosphate binding	0.0013101	GOLPH3/ARFIP1/GBF1/KIF16B	4
modulem6	GO:0016887	ATPase activity	0.0013101	KIF20B/KIF3A/KIF3B/KIF1B/KIF16B	5
modulem6	GO:0005543	phospholipid binding	0.00380539	SPTBN1/GOLPH3/ARFIP1/GBF1/KIF16B	5
modulem6	GO:0035091	phosphatidylinositol binding	0.00412804	GOLPH3/ARFIP1/GBF1/KIF16B	4
modulem6	GO:0042623	ATPase activity, coupled	0.00412804	KIF20B/KIF3A/KIF3B/KIF16B	4
modulem6	GO:0070273	phosphatidylinositol-4-phosphate binding	0.00511297	GOLPH3/ARFIP1	2
modulem6	GO:0080025	phosphatidylinositol-3,5-bisphosphate binding	0.00511297	GBF1/KIF16B	2
modulem6	GO:1990583	phospholipase D activator activity	0.0091343	ARF1	1
modulem6	GO:0005547	phosphatidylinositol-3,4,5-trisphosphate binding	0.0101191	GBF1/KIF16B	2
modulem6	GO:0019894	kinesin binding	0.0104552	KIF1B/KLC2	2
modulem6	GO:0120170	intraciliary transport particle B binding	0.0148301	KIF3B	1
modulem6	GO:1902936	phosphatidylinositol bisphosphate binding	0.0506173	GBF1/KIF16B	2
modulem6	GO:0017137	Rab GTPase binding	0.0608077	KIF3A/KIF16B	2
modulem6	GO:0016004	phospholipase activator activity	0.0657119	ARF1	1
modulem6	GO:0017016	Ras GTPase binding	0.0657119	KIF3A/KIF3B/KIF16B	3
modulem6	GO:0031267	small GTPase binding	0.0694283	KIF3A/KIF3B/KIF16B	3
modulem6	GO:0060229	lipase activator activity	0.0694283	ARF1	1
modulem6	GO:0005086	ARF guanyl-nucleotide exchange factor activity	0.0815192	GBF1	1
modulem6	GO:0034237	protein kinase A regulatory subunit binding	0.0829321	ARFGEF1	1
modulem6	GO:0030506	ankyrin binding	0.0907426	SPTBN1	1
modulem6	GO:0008017	microtubule binding	0.0907426	KIF20B/DCTN1	2
modulem6	GO:0050699	WW domain binding	0.0907426	KIF20B	1
modulem6	GO:0070840	dynein complex binding	0.0915879	DCTN1	1
modulem6	GO:0030507	spectrin binding	0.103967	KIF3A	1
modulem6	GO:0043325	phosphatidylinositol-3,4-bisphosphate binding	0.103967	KIF16B	1
modulem6	GO:0005085	guanyl-nucleotide exchange factor activity	0.103967	ARFGEF1/GBF1	2
modulem7	GO:0008135	translation factor activity, RNA binding	1.93967e-25	EIF5A2/EIF2A/EIF5B/EIF4G1/EIF2S3/EIF4E/EIF3G/EIF3E/EIF3I/EIF3D/EIF4H/GSPT1/DENR/EIF1AX	14
modulem7	GO:0003743	translation initiation factor activity	3.16409e-21	EIF2A/EIF5B/EIF4G1/EIF2S3/EIF4E/EIF3G/EIF3E/EIF3I/EIF3D/DENR/EIF1AX	11
modulem7	GO:0003735	structural constituent of ribosome	0.000105214	MRPL11/RPLP0/RPL5/RPL27/RPLP1	5
modulem7	GO:0000339	RNA cap binding	0.00316732	EIF4E/EIF3D	2
modulem7	GO:0003924	GTPase activity	0.00541781	SRP54/EIF5B/EIF2S3/GSPT1	4
modulem7	GO:0031369	translation initiation factor binding	0.00564634	EIF4G1/EIF4E	2
modulem7	GO:0043021	ribonucleoprotein complex binding	0.00564634	SRP54/EIF5A2/EIF2A	3
modulem7	GO:0045296	cadherin binding	0.00717821	EIF2A/EIF2S3/EIF3E/EIF4H	4
modulem7	GO:0031370	eukaryotic initiation factor 4G binding	0.00717821	EIF4E	1
modulem7	GO:0005525	GTP binding	0.00717821	SRP54/EIF5B/EIF2S3/GSPT1	4
modulem7	GO:0032550	purine ribonucleoside binding	0.00717821	SRP54/EIF5B/EIF2S3/GSPT1	4
modulem7	GO:0001883	purine nucleoside binding	0.00717821	SRP54/EIF5B/EIF2S3/GSPT1	4
modulem7	GO:0032549	ribonucleoside binding	0.00717821	SRP54/EIF5B/EIF2S3/GSPT1	4
modulem7	GO:0001882	nucleoside binding	0.00717821	SRP54/EIF5B/EIF2S3/GSPT1	4
modulem7	GO:0019001	guanyl nucleotide binding	0.00717821	SRP54/EIF5B/EIF2S3/GSPT1	4
modulem7	GO:0032561	guanyl ribonucleotide binding	0.00717821	SRP54/EIF5B/EIF2S3/GSPT1	4
modulem7	GO:0043022	ribosome binding	0.00854895	EIF5A2/EIF2A	2
modulem7	GO:0098808	mRNA cap binding	0.0094866	EIF3D	1
modulem7	GO:0030942	endoplasmic reticulum signal peptide binding	0.0134698	SRP54	1
modulem7	GO:0003729	mRNA binding	0.013859	RPL5/EIF4G1/EIF3D/SECISBP2	4
modulem7	GO:0003730	mRNA 3'-UTR binding	0.013859	RPL5/SECISBP2	2
modulem7	GO:0050839	cell adhesion molecule binding	0.0148646	EIF2A/EIF2S3/EIF3E/EIF4H	4
modulem7	GO:0003747	translation release factor activity	0.0170337	GSPT1	1
modulem7	GO:0008079	translation termination factor activity	0.0170337	GSPT1	1
modulem7	GO:1990948	ubiquitin ligase inhibitor activity	0.0170337	RPL5	1
modulem7	GO:0055105	ubiquitin-protein transferase inhibitor activity	0.019638	RPL5	1
modulem7	GO:0008312	7S RNA binding	0.0220443	SRP54	1
modulem7	GO:0000340	RNA 7-methylguanosine cap binding	0.0234367	EIF4E	1
modulem7	GO:0008190	eukaryotic initiation factor 4E binding	0.0234367	EIF4G1	1
modulem7	GO:0008097	5S rRNA binding	0.0310744	RPL5	1
modulem7	GO:0003746	translation elongation factor activity	0.0327788	EIF5A2	1
modulem7	GO:0070006	metalloaminopeptidase activity	0.0369859	METAP1	1
modulem7	GO:0055106	ubiquitin-protein transferase regulator activity	0.0409213	RPL5	1
modulem7	GO:0005048	signal sequence binding	0.0543432	SRP54	1
modulem7	GO:0048027	mRNA 5'-UTR binding	0.0551448	RPL5	1
modulem8	GO:0003924	GTPase activity	1.22869e-05	RAB8A/TUBB4B/TUBB/TUBB2A/TUBB2B/TUBA4A/TUBA1C	7
modulem8	GO:0042288	MHC class I protein binding	0.0154534	TUBB4B/TUBB	2
modulem8	GO:0016596	thienylcyclohexylpiperidine binding	0.044109	CEP104	1
modulem8	GO:0042287	MHC protein binding	0.044109	TUBB4B/TUBB	2
modulem8	GO:0015459	potassium channel regulator activity	0.0450608	YWHAE/AKAP9	2
modulem8	GO:0008017	microtubule binding	0.0469005	MAPRE1/NDE1/MAPRE2	3
modulem8	GO:0008426	protein kinase C inhibitor activity	0.0613108	YWHAG	1
modulem8	GO:0050815	phosphoserine residue binding	0.0714639	YWHAE	1
modulem8	GO:0051082	unfolded protein binding	0.0867887	TUBB4B/TMEM67	2
modulem8	GO:0015631	tubulin binding	0.0867887	MAPRE1/NDE1/MAPRE2	3
modulem8	GO:0061676	importin-alpha family protein binding	0.0867887	TPX2	1
modulem8	GO:0031625	ubiquitin protein ligase binding	0.0867887	AURKA/YWHAE/TUBB	3
modulem8	GO:0099106	ion channel regulator activity	0.0867887	YWHAE/AKAP9	2
modulem8	GO:0044389	ubiquitin-like protein ligase binding	0.0867887	AURKA/YWHAE/TUBB	3
modulem8	GO:0045296	cadherin binding	0.0867887	MAPRE1/CKAP5/YWHAE	3
modulem8	GO:0016595	glutamate binding	0.0867887	CEP104	1
modulem8	GO:0044325	ion channel binding	0.0867887	YWHAE/AKAP9	2
modulem8	GO:0031005	filamin binding	0.0867887	TMEM67	1
modulem8	GO:0016594	glycine binding	0.0877557	CEP104	1
modulem8	GO:0016247	channel regulator activity	0.0877557	YWHAE/AKAP9	2
modulem8	GO:0051010	microtubule plus-end binding	0.0877557	MAPRE1	1
modulem8	GO:0005159	insulin-like growth factor receptor binding	0.0922834	YWHAG	1
modulem8	GO:0032794	GTPase activating protein binding	0.0922834	TUBB	1
modulem8	GO:0023026	MHC class II protein complex binding	0.0923517	YWHAE	1
modulem8	GO:0031489	myosin V binding	0.0923517	RAB8A	1
modulem8	GO:0034237	protein kinase A regulatory subunit binding	0.0923517	AKAP9	1
modulem8	GO:0005540	hyaluronic acid binding	0.10434	HMMR	1
modulem8	GO:0005516	calmodulin binding	0.108043	IQCB1/CEP97	2
modulem8	GO:0031406	carboxylic acid binding	0.111937	HMMR/CEP104	2
modulem8	GO:0043177	organic acid binding	0.111937	HMMR/CEP104	2
modulem8	GO:0023023	MHC protein complex binding	0.113081	YWHAE	1
modulem9	GO:0003924	GTPase activity	3.75635e-07	RAB8A/TUBB4B/TUBB/TUBB2A/TUBB2B/TUBA4A/TUBA1C/TUBB3	8
modulem9	GO:0008017	microtubule binding	0.00859343	MAPRE1/NDE1/MAPRE2/MACF1	4
modulem9	GO:0042288	MHC class I protein binding	0.00966367	TUBB4B/TUBB	2
modulem9	GO:0015631	tubulin binding	0.0207112	MAPRE1/NDE1/MAPRE2/MACF1	4
modulem9	GO:0016596	thienylcyclohexylpiperidine binding	0.0236632	CEP104	1
modulem9	GO:0045296	cadherin binding	0.0236632	MAPRE1/CKAP5/YWHAE/MACF1	4
modulem9	GO:0042287	MHC protein binding	0.0236632	TUBB4B/TUBB	2
modulem9	GO:0015459	potassium channel regulator activity	0.0264452	YWHAE/AKAP9	2
modulem9	GO:0005516	calmodulin binding	0.0277437	IQCB1/CEP97/INVS	3
modulem9	GO:1990890	netrin receptor binding	0.0277437	TUBB3	1
modulem9	GO:0008426	protein kinase C inhibitor activity	0.0377989	YWHAG	1
modulem9	GO:0050815	phosphoserine residue binding	0.0461579	YWHAE	1
modulem9	GO:0050839	cell adhesion molecule binding	0.0486212	MAPRE1/CKAP5/YWHAE/MACF1	4
modulem9	GO:0051011	microtubule minus-end binding	0.0494112	MACF1	1
modulem9	GO:0051082	unfolded protein binding	0.0507965	TUBB4B/TMEM67	2
modulem9	GO:0099106	ion channel regulator activity	0.0608821	YWHAE/AKAP9	2
modulem9	GO:0016595	glutamate binding	0.0608821	CEP104	1
modulem9	GO:0044325	ion channel binding	0.0608821	YWHAE/AKAP9	2
modulem9	GO:0005525	GTP binding	0.0608821	RAB8A/ARL13B/EEF1A2	3
modulem9	GO:0032550	purine ribonucleoside binding	0.0608821	RAB8A/ARL13B/EEF1A2	3
modulem9	GO:0031005	filamin binding	0.0608821	TMEM67	1
modulem9	GO:0001883	purine nucleoside binding	0.0608821	RAB8A/ARL13B/EEF1A2	3
modulem9	GO:0032549	ribonucleoside binding	0.0608821	RAB8A/ARL13B/EEF1A2	3
modulem9	GO:0016594	glycine binding	0.0608821	CEP104	1
modulem9	GO:0001882	nucleoside binding	0.0608821	RAB8A/ARL13B/EEF1A2	3
modulem9	GO:0019001	guanyl nucleotide binding	0.0608821	RAB8A/ARL13B/EEF1A2	3
modulem9	GO:0032561	guanyl ribonucleotide binding	0.0608821	RAB8A/ARL13B/EEF1A2	3
modulem9	GO:0016247	channel regulator activity	0.0608821	YWHAE/AKAP9	2
modulem9	GO:0051010	microtubule plus-end binding	0.0615831	MAPRE1	1
modulem9	GO:0005159	insulin-like growth factor receptor binding	0.066356	YWHAG	1
modulem9	GO:0032794	GTPase activating protein binding	0.066356	TUBB	1
modulem9	GO:0023026	MHC class II protein complex binding	0.0684471	YWHAE	1
modulem9	GO:0031489	myosin V binding	0.0684471	RAB8A	1
modulem9	GO:0034237	protein kinase A regulatory subunit binding	0.0684471	AKAP9	1
modulem9	GO:0023023	MHC protein complex binding	0.0970957	YWHAE	1
GO: Gene Ontology
